# Supplementary material for: Deep immune profiling of patients treated with lenalidomide and dexamethasone with or without daratumumab
Source: PubMed Central journal article supplement (PMC7862054; doi:10.1038/s41375-020-0855-4), 2020-05-26

## SUPPLEMENTAL MATERIALS

This supplementary file contains additional methods, tables, and figures that are relevant to the methods and conclusions of the main text, regarding the immune modifications observed with daratumumab plus lenalidomide and dexamethasone treatment in relapsed/refractory multiple myeloma patients from the phase 3 POLLUX trial.

### Supplemental methods

#### *CyTOF<sup>®</sup> sample sources and staining*

Patient samples were handled as previously described<sup>1</sup> with minor modifications. Patients were classified as responders (ie, patients with best overall responses of partial response, very good partial response, complete response, or stringent complete response) or nonresponders (ie, patients with a best response of minimal response, stable disease, or progressive disease).

Patient whole blood (WB) samples were collected and fixed in SmartTubes<sup>®</sup> (Smart Tube, Inc. Palo Alto, CA, USA) for 10 minutes at room temperature and stored at  $-80^{\circ}\text{C}$  until analysis.

Purified metal-conjugated antibodies from Fluidigm (Fluidigm Corp, San Francisco, CA, USA) or labeled in-house using the Maxpar<sup>®</sup> Antibody Labeling Kit (Fluidigm) according to the manufacturer's protocol were used for cytometry by time-of-flight (CyTOF) staining and analysis. Prior to staining, samples were thawed in a  $10^{\circ}\text{C}$  water bath for 20 minutes, and red blood cells were lysed with the addition of a hypotonic thaw-lyse buffer (SmartTube<sup>®</sup>) according to the manufacturer's protocol. If complete lysis was not achieved after 2 lysis steps, a third lysis step was performed using lyse buffer 2 (SmartTube<sup>®</sup>). Samples still containing red blood cells after 3 lysis steps were further purified by CD235 depletion (MACSxpress Erythrocyte Depletion

Kit, Miltenyi Biotec, Teterow, Germany). Cells were washed with stain buffer (BD Biosciences, San Jose, CA, USA). To block surface Fc receptors, each sample received 10  $\mu$ l of Human TruStain FcX (BioLegend, San Diego, CA, USA) and was incubated for 15 minutes at 4°C. Cells were then incubated with a mixture of 35 surface marker metal-conjugated antibodies (not including intracellular antibodies active caspase-3, CTLA4, and granzyme B antibodies; **Table S1**) for 45 minutes at 4°C. Regarding staining of CD38, samples were stained with fluorescein isothiocyanate  $\alpha$ -CD38 (HuMax-003; Genmab/Janssen Research & Development), an antibody that binds to an epitope that is distinct from the epitope bound by daratumumab.<sup>2</sup> Samples were washed twice with staining buffer and subsequently permeabilized with 1 ml of ice cold PermWash buffer (BD Biosciences), added while vortexing and incubated for 20 minutes at 4°C. Cells were pelleted by centrifugation for 6 minutes at 600g and supernatant was discarded. Intracellular staining was performed using anti-caspase-3, anti-granzyme B, and anti-CTLA4 antibodies. Upon addition of intracellular antibodies, samples were incubated for 45 minutes at 4°C. Cells were washed twice with 2 ml of PermWash buffer and once with 2 ml of staining buffer. Then 1 ml of ice cold PermIII buffer (BD Biosciences) was added while vortexing and samples were incubated for 20 minutes at 4°C. Cells were washed twice with 2 ml of staining buffer, followed by 1 wash with 2 ml of phosphate-buffered saline. Cells were resuspended in phosphate-buffered saline containing Intercalator Iridium and Rhodium (Fluidigm) and barcoded using Cell-ID™ 20-Plex Pd Barcoding Kit (Fluidigm), followed by a 30-minute incubation at 4°C. Cells were washed twice with 2 ml of staining buffer, followed by 1 wash with ultrapure water. Labeled cells were then dissolved in ultrapure water with EQ™ Four Element Calibration Beads at a concentration of  $3.3 \times 10^4$  beads/mL (Fluidigm) for analysis with a CyTOF C5 system (Fluidigm). Samples were run at an acquisition rate of 300 to 500 cells/min. Each

experiment was run with a maximum of 20 samples per experiment, including an aliquot of WB from a healthy donor for quality control.

### ***Data preprocessing and quality control***

Data acquired on CyTOF<sup>®</sup> were obtained in FCS file format and normalized using CyTOF<sup>®</sup> Software 6.5.358 for Stand-Alone Processing Workstations (Fluidigm). FCS files were further analyzed in Cytobank software. Manual gating was used to define granulocyte, lymphocyte, and monocyte populations and spanning-tree progression analysis of density-normalized events (SPADE) analysis was performed on lymphocyte and monocyte populations using lineage markers (**Table S1**). CD38 positivity thresholds were set with a set of separately stained WB samples with a CD38 metal minus 1 antibody panel, and natural killer cells were used as the positive compensation population. B cells were used to set thresholds of other activation markers, based on expression levels of not expressed (ie, CTLA4, PD1, and CD137) or definitively expressed (HLA-DR). Quality control assessment of 19 WB control samples from 19 different batches was performed using the earth mover's distance (EMD)<sup>3</sup> algorithm across channels, by clustering on the pairwise EMD matrix (calculated from cell count distributions of 150 nodes in the samples' SPADE minimum spanning trees). For individual channel quality control analysis, marker enrichment modeling (MEM)<sup>4</sup> was used. MEM scores were calculated using the median control (batch 10) as a reference. Scaling between -10 and 10 was defined relative to the highest maximum MEM score across all channels for the controls and samples. The channels were subsequently ranked (from left to right) by mean absolute MEM scores for the 19 WB controls in descending order.

### ***Bootstrap P values***

To obtain  $P$  values ( $P^*$ ) corrected for the multiple dependent hypothesis tests, we used the bootstrap single-step minP multiple testing procedure.<sup>5,6</sup> Resampling was performed with replacement (“bootstrapping”) at both the sample and cell level (100 bootstrap runs) and a down-/up-sample relative to the median cell count was generated at the cell level. The assignment of sample group labels to bootstrap samples was randomized to generate a null distribution of smallest  $P$  values for comparison with raw  $P$  values.

### ***Imputation at the node level***

For each sample with 1 or more empty node(s) in the SPADE tree, the marker signal for each empty node was assigned to the mean marker intensity of the subset of cells from  $\leq 3$  nearest neighboring nodes, when all fell within the smallest parent population of the empty node. To identify the nearest neighbors of an empty node, the shortest-path length distance between nodes was calculated as the sum of edge weights in the SPADE minimum spanning tree.

### ***Bin analysis***

Cells were sorted from smallest to the highest value, and the empirical cumulative distribution function of each condition was computed to calculate the significance of the difference between any 2 conditions. To control for differences in cell numbers collected across different samples, the contribution of each cell to the empirical cumulative distribution function was divided by the total number of cells within each sample. The difference between the empirical cumulative distribution function of the test condition to the reference condition was integrated over the difference in values observed in each group, resulting in a signed value, which was used as the

test statistic and was compared to the bootstrap distribution obtained by repeating the procedure 400 times, each time randomly assigning samples to conditions to generate a 2-tailed  $P$  value showing the significance of the difference between conditions.

### *NanoString analysis*

RNA was extracted from aliquots of viably frozen peripheral-blood mononuclear cells using the Qiagen AllPrep kit (Qiagen, Germantown, MD, USA) according to the manufacturer's instructions. One hundred nanograms of total RNA from each of 316 samples were hybridized to the NanoString PanCancer Immune Profiling Panel. Hybridizations were purified and scanned using the NanoString nCounter Analysis System (file version: 1.7, software version: 3.1.0.1). Raw RCC files were loaded into R using the NanoStringNorm package (<https://CRAN.R-project.org/package=NanoStringNorm>; version 1.2.1). Samples were considered poorly quantified and removed from analysis if their median  $\log_2$  raw count was  $\leq 3$  ( $n=15$  samples), or if the  $R^2$  value of the positive control probes was  $< 0.95$  ( $n=1$  sample; also identified by the low expression filter). Upon removal of poorly quantified samples, the 301 samples remaining were normalized and quality controlled using procedures implemented in the NanoStringNorm package (**Figure S2**). Nine additional samples were subsequently removed during this process due to extreme positive normalization factors, backgrounds, or RNA content, resulting in a final data set of 292 samples and 730 endogenously targeted probes. Endogenous probes were also filtered to remove poorly quantified features and the postnormalization mean background probe level was calculated across the data set. A feature was preserved if it was expressed above mean background probe level in  $> 52$  samples (52 was determined by calculating three-fourths of the

number of samples in the smallest group of interest for the differential expression comparison [70 samples]).

Patients who were included in the final analysis represented a well-balanced subgroup of the entire patient population from POLLUX. Each differential expression model included a term for NanoString Plate ID to account for the batch effect (observed via Principal Variance Components Analysis). Batches were proactively randomized by treatment, time point, and response. A random-effect blocking term and the `limma::duplicateCorrelation` function were used to correct for increased correlation and statistically control for the pairing of samples due to repeated collection from patients across time points. Analyses were conducted using CyTOF-derived cellular abundance estimates as covariates in the model matrix (terms were used for: Memory\_CD8, Naive\_CD8, NK, Memory\_CD4, Naive\_CD4, T<sub>reg</sub>, Basophils, B\_cells, Monocytes, pDC, mDC, Aspecific), in addition to standard response-based differential expression tests, to remove the contribution of bulk cell type differences from the differential expression signal and allow for the focus on altered transcriptional behavior.

### ***T-cell clonality and richness analyses***

Paired samples were collected on Day 1 of Cycles 1 and 3 for 133 and 124 patients treated with daratumumab given with lenalidomide and dexamethasone and lenalidomide and dexamethasone alone, respectively, and T-cell clonality was measured by tracking the genomic T-cell receptors (TCRs) from DNA extracted from patient frozen peripheral-blood mononuclear cells. TCR rearrangements were analyzed using prequalified multiplex polymerase chain reaction assays (TR2015CRO-V-019) using primers targeting the variable and joining genes of the TCR. The

amplicon generated from the initial round of polymerase chain reaction was subsequently amplified with primers that contained the universal and adapter sequences required for DNA sequencing by Illumina<sup>®</sup> (Illumina Inc, San Diego, CA, USA).

### ***Calculation of clonality***

The extent of mono- or oligoclonal expansion was calculated and quantitated by measuring the shape of the clone frequency distribution by using the following equations.

$$\text{Entropy} = H = -\sum_{i=1}^N p_i \log_2(p_i) ; \text{Clonality} = 1 - (H/\log_2(N)), \text{ where } N \text{ is the total number of unique}$$

TCR $\beta$  clones and  $p_i$  is the frequency of the  $i$ th unique TCR $\beta$  clone. Calculated values ranged from 0 to 1, where values approaching 1 indicated a nearly monoclonal population.

### ***Estimation of richness***

Richness of a TCR $\beta$  repertoire is the number of clones defined by unique TCR $\beta$  rearrangements. In a given sample, the number of unique TCR $\beta$  clones detected was sensitive to sampling depth. The Daley and Smith estimator was used to correct for varying sampling depths and estimate the true richness of a repertoire. The height of the horizontal asymptote on the rarefaction curve was used as an estimator for richness.

### ***References for supplemental materials***

1. Smets T, Stevenaert F, Adams H 3rd, Vanhoof G. Deep profiling of the immune system of multiple myeloma patients using cytometry by time-of-flight (CyTOF). *Methods Mol Biol.* 2018; 1792: 47–54.

2. van de Donk NW, Moreau P, Plesner T, Palumbo A, Gay F, Laubach JP, *et al.* Clinical efficacy and management of monoclonal antibodies targeting CD38 and SLAMF7 in multiple myeloma. *Blood*. 2016; 127: 681–695.
3. Qiu P. Inferring phenotypic properties from single-cell characteristics. *PLoS One*. 2012; 7: e37038.
4. Diggins KE, Greenplate AR, Leelatian N, Wogsland CE, Irish JM. Characterizing cell subsets using marker enrichment modeling. *Nat Methods*. 2017; 14: 275–278.
5. Westfall P, Young S. *Resampling-based Multiple Testing: Examples and Methods for P-value Adjustment*. (Wiley, New York, 1993).
6. Sham PC, Purcell SM. Statistical power and significance testing in large-scale genetic studies. *Nat Rev Genet*. 2014; 15: 335–346.



## Supplemental Tables

**Table S1. CyTOF® antibody markers**

| <b>Specificity</b> | <b>Clone</b> | <b>Provider</b>  | <b>Catalog nr</b> | <b>Metal isotope</b> | <b>Purpose</b>                          |
|--------------------|--------------|------------------|-------------------|----------------------|-----------------------------------------|
| CD45*              | HI30         | Fluidigm         | 3089003B          | 89Y                  | Leukocytes                              |
| CD66b*             | 80H3         | Abnova           | custom            | 139La                | Granulocytes                            |
| Caspase 3          | C92-605      | BD               | 559565            | 141Nd                | Apoptotic cells                         |
| CD20*              | 2H7          | BD               | 555621            | 142Nd                | B lymphocytes                           |
| CD3*               | UCHT1        | BD               | 555329            | 143Nd                | T lymphocytes                           |
| CD11b*             | ICRF44       | Fluidigm         | 3144001B          | 144Nd                | Monocytes, NK                           |
| CD4*               | RPA-T4       | Fluidigm         | 3145001B          | 145Nd                | T-helper lymphocytes                    |
| CD8*               | RPA-T8       | Fluidigm         | 3146001B          | 146Nd                | Cytotoxic T lymphocytes                 |
| CD24*              | ML5          | BD               | 555426            | 147Sm                | Regulatory B cells                      |
| CD34*              | 581          | Fluidigm         | 3148001B          | 148Nd                | Hematopoietic progenitor cells          |
| CD45RO*            | UCHL1        | Fluidigm         | 3149001B          | 149Sm                | Memory T lymphocytes                    |
| CD138              | MI15         | BD               | 551902            | 150Nd                | Plasma cells, multiple myeloma cells    |
| CD33*              | WM53         | BD               | 555449            | 151Eu                | Myeloid cells                           |
| CD55               | MEM118       | Abcam            | ab1422            | 152Sm                | Complement inhibition                   |
| CD366 (TIM3)       | 344823       | R&D              | MAB2365           | 153Eu                | Effector T cells, T-cell exhaustion     |
| CD45RA*            | HI100        | BD               | 555486            | 154Sm                | Naive T lymphocytes                     |
| CD27*              | L128         | Fluidigm         | 3155001B          | 155Gd                | Memory B lymphocytes, T lymphocytes     |
| CD152 (CTLA4)      | L3D10        | Fluidigm         | 3158013B          | 156Gd                | Regulatory T cells, T-cell activation   |
| CD137              | 4B4-1        | Fluidigm         | 3158013B          | 158Gd                | Activated NK cells                      |
| CD123*             | 9F5          | BD               | 555642            | 159Tb                | Plasmacytoid dendritic cells, basophils |
| CD69               | FN50         | BD               | 555529            | 160Dy                | T-cell early activation                 |
| CD28*              | CD28.2       | BD               | 555725            | 161Dy                | T-cell costimulation                    |
| CD11c*             | Bu15         | Fluidigm         | 3162005B          | 162Dy                | Monocytes, myeloid dendritic cells      |
| Granzyme B*        | GB11         | Thermo Fisher Sc | MA1-80734         | 163Dy                | Activated T cells, NK cells             |
| CD15*              | W6D3         | Fluidigm         | 3164001B          | 164Dy                | Granulocytes                            |
| CD127*             | eBioRDR5     | E-Bioscience     | 14-1278-82        | 165Ho                | Activated and regulatory T lymphocytes  |

|                   |              |           |                      |               |                                                              |
|-------------------|--------------|-----------|----------------------|---------------|--------------------------------------------------------------|
| GPRC5D            | 571961       | R&D       | custom               | 166Er         | Plasma cells                                                 |
| CD19*             | HIB19        | BD        | 555409               | 167Er         | B lymphocytes                                                |
| CD269 (BCMA)      | Vicky        | Enzo      | ALX-804-<br>151-C100 | 168Er         | Plasma cells                                                 |
| CD25*             | M-A251       | BD        | 555429               | 169Tm         | Activated and regulatory T lymphocytes                       |
| CD279 (PD-1)      | EH12-1       | BD        | 562138               | 170Er         | T-cell co-inhibitory receptor/exhaustion                     |
| CD14*             | HCD14        | Biolegend | 325602               | 171Yb         | Monocytes, macrophages                                       |
| CD38              | HuMax        | Janssen   | custom               | 172Yb         | Daratumumab target, activation, plasma cells                 |
| VISTA             | GG8          | Janssen   | custom               | 173Yb         | T-cell co-inhibitory receptor                                |
| HLA-DR*           | 646-6        | BD        | 555809               | 174Yb         | Dendritic cells, monocytes, B lymphocytes, T cell activation |
| CD274 (PDL-1)     | 29E.2A3      | Fluidigm  | 3175017B             | 175Lu         | Activation PD-1                                              |
| CD56 <sup>a</sup> | R19-760      | BD        | 563237               | 176Yb         | NK and NKT cells                                             |
| DNA               | Intercalator | Fluidigm  | 201192B              | 191Ir, 193 Ir | Nucleated cells                                              |
| CD16              | 3G8          | Fluidigm  | 3209002B             | 209Bi         | Proinflammatory monocytes, NK subset, granulocytes           |

BCMA, B-cell maturation antigen; CTLA4, cytotoxic T-lymphocyte-associated protein 4; GPRC5D, G-protein coupled receptor family C group 5 member D; NK, natural killer; NKT, natural killer T cell; PD-1, programmed death-1; PDL-1, programmed death ligand-1; SPADE, spanning-tree progression of density-normalized events; TIM3, T-cell immunoglobulin mucin-3; VISTA, V-domain immunoglobulin suppressor of T-cell activation.

\*Markers used for SPADE annotation.

**Table S2. SPADE bubble marker annotations**

| <b>Population</b>                               | <b>Markers</b>                                                                                                             |
|-------------------------------------------------|----------------------------------------------------------------------------------------------------------------------------|
| Aspecific                                       | No definitive lineage staining pattern                                                                                     |
| CD45 <sup>neg/lo</sup>                          | CD45 <sup>-/low</sup>                                                                                                      |
| Basophils                                       | CD45 <sup>-/dim</sup> , CD123 <sup>+</sup> , HLADR <sup>-</sup>                                                            |
| PBMCs                                           | CD45 <sup>mid-bright</sup>                                                                                                 |
| Monos                                           | CD45 <sup>+</sup> CD14 <sup>+</sup>                                                                                        |
| ProInflamm Monos                                | CD16 <sup>+</sup> CD14 <sup>mid</sup>                                                                                      |
| pDCs                                            | CD45 <sup>+</sup> CD123 <sup>+</sup> , CD11c <sup>low</sup> , HLADR <sup>+</sup>                                           |
| mDCs                                            | CD45 <sup>+</sup> CD123 <sup>-</sup> , CD11c <sup>high</sup> , HLADR <sup>mid</sup>                                        |
| CD16 <sup>+</sup> mDC                           | CD45 <sup>+</sup> CD123 <sup>-</sup> , CD11c <sup>high</sup> , HLADR <sup>mid</sup> , CD16 <sup>+</sup>                    |
| CD16 <sup>-</sup> mDC                           | CD45 <sup>+</sup> CD123 <sup>-</sup> , CD11c <sup>high</sup> , HLADR <sup>mid</sup> , CD16 <sup>-</sup>                    |
| Lymphocytes                                     | All CD45 <sup>+</sup> CD3 <sup>+</sup> , CD56 <sup>+</sup> , CD19 <sup>+</sup> or CD20 <sup>+</sup><br>Nonmonocytes or DCs |
| B cells                                         | CD45 <sup>+</sup> , CD3 <sup>-</sup> , CD19 <sup>+</sup> , CD20 <sup>+/-</sup>                                             |
| Memory B cells                                  | CD45 <sup>+</sup> , CD3 <sup>-</sup> , CD19 <sup>+</sup> , CD20 <sup>+/-</sup> , CD27 <sup>+</sup>                         |
| B <sub>regs</sub>                               | CD45 <sup>+</sup> , CD3 <sup>-</sup> , CD19 <sup>+</sup> , CD20 <sup>+/-</sup> , CD24 <sup>+</sup> CD38 <sup>high</sup>    |
| NK cells                                        | CD45 <sup>+</sup> , CD3 <sup>-</sup> , CD19 <sup>-</sup> , CD20 <sup>-</sup> , CD56 <sup>+</sup>                           |
| CD56 <sup>Br</sup> (CD56 <sup>bright</sup> ) NK | CD45 <sup>+</sup> , CD3 <sup>-</sup> , CD19 <sup>-</sup> , CD20 <sup>-</sup> , CD56 <sup>bright</sup>                      |
| CD56 <sup>dim</sup> NK                          | CD45 <sup>+</sup> , CD3 <sup>-</sup> , CD19 <sup>-</sup> , CD20 <sup>-</sup> , CD56 <sup>dim</sup>                         |
| T cells                                         | CD45 <sup>+</sup> , CD3 <sup>+</sup> , CD19 <sup>-</sup> CD20 <sup>-</sup> , CD56 <sup>+/-</sup>                           |
| CD4 <sup>+</sup> T cells                        | CD45 <sup>+</sup> , CD3 <sup>+</sup> , CD4 <sup>+</sup> , CD8 <sup>-</sup>                                                 |
| Naive CD4 <sup>+</sup> T cells                  | CD45 <sup>+</sup> , CD3 <sup>+</sup> , CD4 <sup>+</sup> , CD8 <sup>-</sup> , CD45RA <sup>+</sup>                           |
| T <sub>EMRA</sub> CD4 <sup>+</sup> T cells      | CD45 <sup>+</sup> , CD3 <sup>+</sup> , CD4 <sup>+</sup> , CD8 <sup>-</sup> , CD45RA <sup>+</sup> , CD27 <sup>-</sup>       |
| Naive NKT CD4 <sup>+</sup>                      | CD45 <sup>+</sup> , CD3 <sup>+</sup> , CD4 <sup>+</sup> , CD8 <sup>-</sup> , CD45RA <sup>+</sup> , CD56 <sup>+</sup>       |
| Memory CD4 <sup>+</sup> T cells                 | CD45 <sup>+</sup> , CD3 <sup>+</sup> , CD4 <sup>+</sup> , CD8 <sup>-</sup> , CD45RO <sup>-</sup>                           |
| T <sub>EM</sub> CD4 <sup>+</sup> T cells        | CD45 <sup>+</sup> , CD3 <sup>+</sup> , CD4 <sup>+</sup> , CD8 <sup>-</sup> , CD45RO <sup>+</sup> , CD27 <sup>-</sup>       |
| T <sub>CM</sub> CD4 <sup>+</sup> T cells        | CD45 <sup>+</sup> , CD3 <sup>+</sup> , CD4 <sup>+</sup> , CD8 <sup>-</sup> , CD45RO <sup>+</sup> , CD27 <sup>+</sup>       |
| T <sub>regs</sub>                               | CD45 <sup>+</sup> , CD3 <sup>+</sup> , CD4 <sup>+</sup> , CD8 <sup>-</sup> , CD127 <sup>-</sup> CD25 <sup>+</sup>          |
| CD8 <sup>+</sup> T cells                        | CD45 <sup>+</sup> , CD3 <sup>+</sup> , CD8 <sup>+</sup> , CD4 <sup>-</sup>                                                 |
| Naive CD8 <sup>+</sup> T cells                  | CD45 <sup>+</sup> , CD3 <sup>+</sup> , CD8 <sup>+</sup> , CD4 <sup>-</sup> , CD45RA <sup>+</sup>                           |
| T <sub>EMRA</sub> CD8 <sup>+</sup> T cells      | CD45 <sup>+</sup> , CD3 <sup>+</sup> , CD8 <sup>+</sup> , CD4 <sup>-</sup> , CD45RA <sup>+</sup> , CD27 <sup>-</sup>       |
| Naive NKT CD8 <sup>+</sup> T cells              | CD45 <sup>+</sup> , CD3 <sup>+</sup> , CD8 <sup>+</sup> , CD4 <sup>-</sup> , CD45RA <sup>+</sup> , CD56 <sup>+</sup>       |
| Memory CD8 <sup>+</sup> T cells                 | CD45 <sup>+</sup> , CD3 <sup>+</sup> , CD8 <sup>+</sup> , CD4 <sup>-</sup> , CD45RO <sup>+</sup>                           |
| T <sub>EM</sub> CD8 <sup>+</sup> T cells        | CD45 <sup>+</sup> , CD3 <sup>+</sup> , CD8 <sup>+</sup> , CD4 <sup>-</sup> , CD45RO <sup>+</sup> , CD27 <sup>-</sup>       |
| T <sub>CM</sub> CD8 <sup>+</sup> T cells        | CD45 <sup>+</sup> , CD3 <sup>+</sup> , CD8 <sup>+</sup> , CD4 <sup>-</sup> , CD45RO <sup>+</sup> , CD27 <sup>+</sup>       |
| Memory NKT CD8 <sup>+</sup> T cells             | CD45 <sup>+</sup> , CD3 <sup>+</sup> , CD8 <sup>+</sup> , CD4 <sup>-</sup> , CD45RO <sup>+</sup> , CD56 <sup>+</sup>       |

B<sub>regs</sub>, regulatory B cells; DC, dendritic cells; mDC, myeloid dendritic cells; mono, monocytes; NK, natural killer; NKT, natural killer T cells; PBMC, peripheral-blood mononuclear cells; pDC, plasmacytoid dendritic cells; proinflamm mono, proinflammatory monocytes; SPADE, spanning-tree

progression analysis of density-normalized events;  $T_{CM}$ , central memory T cells;  $T_{EM}$ , effector memory T cells;  $T_{EMRA}$ , effector memory  $CD45RA^+ CD4^+$  T cells;  $T_{regs}$ , regulatory T cells.

**Table S3. Corresponding LIMMA analysis for Figures S3A and S3B.**

(A) D-Rd at C3D1 versus C1D1. (B) Rd at C3D1 versus C1D1. (C) D-Rd at C3D1 versus C1D1, CyTOF corrected. (D) Rd at C3D1 versus C1D1, CyTOF corrected.

| Name                               | Accession      | missing_frac | logFC    | AveExpr  | t        | P.Value  | adj.P.Val | B        |
|------------------------------------|----------------|--------------|----------|----------|----------|----------|-----------|----------|
| <b>A. D-Rd at C3D1 versus C1D1</b> |                |              |          |          |          |          |           |          |
| SH2D1B                             | NM_053282.4    | 0.205        | -3.41681 | 3.706056 | -14.9021 | 5.78E-37 | 2.83E-34  | 73.30119 |
| KLRF1                              | NM_016523.1    | 0.086        | -3.00283 | 5.228966 | -14.1678 | 2.30E-34 | 5.64E-32  | 67.38061 |
| KLRC1                              | NM_002259.3    | 0.079        | -2.19502 | 4.143517 | -10.4676 | 1.03E-21 | 1.69E-19  | 38.58832 |
| NCAM1                              | NM_000615.5    | 0.017        | -1.53667 | 4.312272 | -10.1965 | 7.80E-21 | 9.55E-19  | 36.59592 |
| KLRC2                              | NM_002260.3    | 0.134        | -1.99793 | 3.811944 | -8.45919 | 1.79E-15 | 1.75E-13  | 24.4365  |
| NCR1                               | NM_004829.5    | 0.017        | -1.35513 | 5.426898 | -7.80681 | 1.34E-13 | 1.09E-11  | 20.19922 |
| CCR5                               | NM_000579.1    | 0.462        | 1.740521 | 1.57749  | 7.740926 | 2.04E-13 | 1.43E-11  | 19.7829  |
| TXK                                | NM_003328.1    | 0.202        | -1.65782 | 2.831012 | -7.63704 | 3.97E-13 | 2.43E-11  | 19.13101 |
| TNFRSF18                           | NM_004195.2    | 0.247        | -1.48002 | 2.385066 | -6.88376 | 4.15E-11 | 2.26E-09  | 14.57908 |
| FEZ1                               | NM_005103.4    | 0.414        | -1.44229 | 1.635389 | -6.54278 | 3.07E-10 | 1.50E-08  | 12.62641 |
| AKT3                               | NM_181690.1    | 0.003        | -0.72754 | 6.132502 | -6.24445 | 1.67E-09 | 7.42E-08  | 10.97699 |
| GNLY                               | NM_006433.2    | 0.003        | -1.00535 | 9.647454 | -6.01491 | 5.90E-09 | 2.41E-07  | 9.746945 |
| KIR_Activating_Subgroup_2          | NM_014512.1    | 0.349        | -1.49462 | 2.233523 | -5.77725 | 2.11E-08 | 7.75E-07  | 8.51051  |
| CD8B                               | NM_004931.3    | 0.024        | 1.062014 | 5.952351 | 5.768002 | 2.21E-08 | 7.75E-07  | 8.463154 |
| PTPRC                              | NM_080921.3    | 0            | 0.655771 | 9.119697 | 5.752554 | 2.40E-08 | 7.85E-07  | 8.384219 |
| S100A12                            | NM_005621.1    | 0            | 0.792894 | 10.46119 | 5.692146 | 3.30E-08 | 1.01E-06  | 8.077119 |
| CCRL2                              | NM_003965.4    | 0.072        | 1.083262 | 3.840413 | 5.650747 | 4.09E-08 | 1.14E-06  | 7.868118 |
| CD84                               | NM_001184879.1 | 0            | 0.429798 | 6.841624 | 5.64538  | 4.21E-08 | 1.14E-06  | 7.841114 |
| CD8A                               | NM_001768.5    | 0            | 0.80596  | 7.865574 | 5.61845  | 4.84E-08 | 1.25E-06  | 7.705905 |
| CD70                               | NM_001252.2    | 0.346        | 1.251414 | 1.907375 | 5.565217 | 6.36E-08 | 1.56E-06  | 7.440137 |
| GZMK                               | NM_002104.2    | 0.01         | 1.054386 | 6.858668 | 5.515896 | 8.19E-08 | 1.91E-06  | 7.195684 |
| PDGFRB                             | NM_002609.3    | 0.349        | -1.14096 | 1.901005 | -5.32375 | 2.16E-07 | 4.80E-06  | 6.259943 |
| PVR                                | NM_006505.3    | 0.182        | 1.136021 | 2.843678 | 5.247303 | 3.15E-07 | 6.71E-06  | 5.895086 |
| MX1                                | NM_002462.2    | 0            | -0.77543 | 7.738464 | -5.121   | 5.82E-07 | 1.19E-05  | 5.301714 |

|                           |                |       |          |          |          |          |          |          |
|---------------------------|----------------|-------|----------|----------|----------|----------|----------|----------|
| ITGAM                     | NM_000632.3    | 0     | 0.483722 | 8.143104 | 5.061426 | 7.76E-07 | 1.52E-05 | 5.025928 |
| CD247                     | NM_198053.1    | 0.007 | -0.68805 | 7.876366 | -5.00378 | 1.02E-06 | 1.92E-05 | 4.761617 |
| KIR_Inhibiting_Subgroup_1 | NM_014218.2    | 0.243 | -1.14847 | 2.723496 | -4.80752 | 2.55E-06 | 4.64E-05 | 3.880651 |
| LAG3                      | NM_002286.5    | 0.065 | 1.086793 | 4.59753  | 4.789119 | 2.78E-06 | 4.86E-05 | 3.799551 |
| CR1                       | NM_000651.4    | 0     | 0.740897 | 8.079674 | 4.745726 | 3.39E-06 | 5.73E-05 | 3.60937  |
| KIR_Activating_Subgroup_1 | NM_001083539.1 | 0.469 | -1.22277 | 1.847964 | -4.70583 | 4.06E-06 | 6.64E-05 | 3.435808 |
| KLRB1                     | NM_002258.2    | 0.007 | -0.71353 | 7.909012 | -4.50459 | 9.95E-06 | 0.000157 | 2.57935  |
| IFITM1                    | NM_003641.3    | 0     | -0.45607 | 10.38768 | -4.26469 | 2.78E-05 | 0.000424 | 1.600485 |
| ITGB2                     | NM_000211.2    | 0     | 0.32014  | 10.81662 | 4.258522 | 2.85E-05 | 0.000424 | 1.575935 |
| IRF4                      | NM_002460.1    | 0.003 | -0.61667 | 6.314729 | -4.09722 | 5.55E-05 | 0.0008   | 0.94487  |
| ISG15                     | NM_005101.3    | 0     | -0.69021 | 7.013594 | -4.08937 | 5.73E-05 | 0.000802 | 0.914705 |
| ABCB1                     | NM_000927.3    | 0.092 | -0.8762  | 3.909035 | -4.04055 | 6.98E-05 | 0.00095  | 0.728275 |
| IL17RA                    | NM_014339.6    | 0.003 | 0.472284 | 7.084215 | 4.017942 | 7.64E-05 | 0.001005 | 0.642586 |
| CD44                      | NM_001001392.1 | 0     | 0.296753 | 11.27305 | 4.012959 | 7.79E-05 | 0.001005 | 0.62376  |
| KLRG1                     | NM_005810.3    | 0.051 | 0.933907 | 5.268751 | 3.98302  | 8.78E-05 | 0.00109  | 0.511088 |
| CYBB                      | NM_000397.3    | 0     | 0.458037 | 9.699284 | 3.979712 | 8.90E-05 | 0.00109  | 0.498682 |
| CD3D                      | NM_000732.4    | 0.003 | 0.570789 | 8.308636 | 3.950701 | 9.98E-05 | 0.001193 | 0.390294 |
| CD36                      | NM_001001548.2 | 0     | 0.524659 | 9.040517 | 3.918928 | 0.000113 | 0.001319 | 0.272398 |
| SIGLEC1                   | NM_023068.3    | 0.182 | -1.29751 | 3.955035 | -3.84717 | 0.00015  | 0.001704 | 0.009272 |
| MAF                       | NM_005360.4    | 0.021 | 0.599062 | 5.451789 | 3.834556 | 0.000157 | 0.001721 | -0.03655 |
| IFIT1                     | NM_001548.3    | 0.079 | -1.06272 | 4.665226 | -3.83281 | 0.000158 | 0.001721 | -0.04288 |
| ENTPD1                    | NM_001098175.1 | 0.092 | 0.778952 | 3.750198 | 3.75999  | 0.000209 | 0.0022   | -0.30458 |
| IRF7                      | NM_001572.3    | 0     | -0.40975 | 7.657972 | -3.75718 | 0.000211 | 0.0022   | -0.31458 |
| BCL6                      | NM_001706.2    | 0     | 0.479732 | 9.486685 | 3.702348 | 0.000259 | 0.002571 | -0.50853 |
| KLRD1                     | NM_002262.3    | 0.014 | -0.72143 | 6.719953 | -3.69959 | 0.000262 | 0.002571 | -0.51821 |
| TARP                      | NM_001003799.1 | 0.003 | 0.530529 | 6.887268 | 3.699418 | 0.000262 | 0.002571 | -0.51882 |
| TNFRSF14                  | NM_003820.2    | 0     | 0.186072 | 7.564073 | 3.643948 | 0.000323 | 0.003091 | -0.71226 |
| LTBR                      | NM_002342.1    | 0.007 | 0.42619  | 6.519281 | 3.639401 | 0.000328 | 0.003091 | -0.728   |
| BST1                      | NM_004334.2    | 0     | 0.400438 | 8.429325 | 3.631924 | 0.000337 | 0.003118 | -0.75384 |
| CD2                       | NM_001767.3    | 0.072 | 0.793883 | 4.100804 | 3.624966 | 0.000346 | 0.003139 | -0.77785 |

|         |                |       |          |          |          |          |          |          |
|---------|----------------|-------|----------|----------|----------|----------|----------|----------|
| CFP     | NM_002621.2    | 0     | 0.331617 | 8.896465 | 3.606935 | 0.00037  | 0.003294 | -0.83987 |
| BATF    | NM_006399.3    | 0.021 | 0.527219 | 4.187868 | 3.576466 | 0.000413 | 0.003523 | -0.94402 |
| KIR3DL2 | NM_006737.2    | 0.253 | -0.84899 | 2.487052 | -3.5754  | 0.000415 | 0.003523 | -0.94767 |
| MAPK3   | NM_001040056.1 | 0     | 0.31298  | 6.641203 | 3.574029 | 0.000417 | 0.003523 | -0.95232 |
| JAK3    | NM_000215.2    | 0     | 0.310342 | 7.79399  | 3.562975 | 0.000434 | 0.003546 | -0.98989 |
| SLC11A1 | NM_000578.2    | 0     | 0.410665 | 8.417996 | 3.562954 | 0.000434 | 0.003546 | -0.98996 |
| IL6R    | NM_000565.2    | 0     | 0.32378  | 6.492918 | 3.551058 | 0.000453 | 0.003622 | -1.03027 |
| AMICA1  | NM_153206.2    | 0     | 0.483811 | 8.896182 | 3.547248 | 0.00046  | 0.003622 | -1.04315 |
| CREB5   | NM_182898.2    | 0.007 | 0.636811 | 6.394364 | 3.543623 | 0.000466 | 0.003622 | -1.0554  |
| ANXA1   | NM_000700.1    | 0     | 0.331873 | 11.06019 | 3.53887  | 0.000474 | 0.003627 | -1.07144 |
| HLA-DOB | NM_002120.3    | 0.01  | -0.63928 | 5.225432 | -3.52261 | 0.000502 | 0.003734 | -1.12616 |
| CD40    | NM_001250.4    | 0.021 | 0.612597 | 5.137436 | 3.522345 | 0.000503 | 0.003734 | -1.12705 |
| CD79B   | NM_021602.2    | 0     | -0.57396 | 7.068639 | -3.5136  | 0.000519 | 0.003796 | -1.15641 |
| PSMB10  | NM_002801.2    | 0     | 0.227266 | 8.926977 | 3.43114  | 0.000696 | 0.005017 | -1.42974 |
| ITGB1   | NM_033666.2    | 0     | 0.25672  | 9.274698 | 3.412549 | 0.000743 | 0.005279 | -1.49055 |
| LCP1    | NM_002298.4    | 0     | 0.263542 | 11.29735 | 3.406474 | 0.000759 | 0.005286 | -1.51035 |
| CD33    | NM_001177608.1 | 0.024 | 0.555835 | 5.324418 | 3.40402  | 0.000766 | 0.005286 | -1.51834 |
| MARCO   | NM_006770.3    | 0.031 | 0.704341 | 5.582365 | 3.373583 | 0.000852 | 0.005798 | -1.61701 |
| CD24    | NM_013230.2    | 0.007 | -0.65722 | 5.745172 | -3.339   | 0.000961 | 0.006447 | -1.72815 |
| S100A8  | NM_002964.3    | 0     | 0.557673 | 12.77144 | 3.297923 | 0.001106 | 0.007325 | -1.85877 |
| CD46    | NM_172350.1    | 0     | 0.184901 | 8.729013 | 3.285543 | 0.001154 | 0.007496 | -1.89784 |
| CD163   | NM_004244.4    | 0.007 | 0.652912 | 7.064932 | 3.283346 | 0.001163 | 0.007496 | -1.90476 |
| CCL5    | NM_002985.2    | 0     | 0.379724 | 10.74778 | 3.213697 | 0.001471 | 0.009306 | -2.12194 |
| FCER1G  | NM_004106.1    | 0     | 0.304969 | 10.93316 | 3.211651 | 0.001481 | 0.009306 | -2.12825 |
| CD7     | NM_006137.6    | 0.007 | -0.35531 | 6.90442  | -3.20036 | 0.001538 | 0.009542 | -2.16302 |
| CTSS    | NM_004079.3    | 0     | 0.296626 | 12.66577 | 3.188827 | 0.001599 | 0.009792 | -2.19844 |
| IL18    | NM_001562.2    | 0.024 | 0.492262 | 5.163597 | 3.162812 | 0.001743 | 0.010455 | -2.27788 |
| CXCL1   | NM_001511.1    | 0.144 | 0.950258 | 4.529862 | 3.161534 | 0.00175  | 0.010455 | -2.28176 |
| STAT5B  | NM_012448.3    | 0     | 0.29585  | 6.965891 | 3.157978 | 0.001771 | 0.010455 | -2.29257 |
| CD14    | NM_000591.2    | 0     | 0.454038 | 9.392181 | 3.129524 | 0.001945 | 0.011346 | -2.37864 |

|                           |                |       |          |          |          |          |          |          |
|---------------------------|----------------|-------|----------|----------|----------|----------|----------|----------|
| TLR4                      | NM_138554.2    | 0.003 | 0.429478 | 6.63778  | 3.102603 | 0.002124 | 0.012245 | -2.45941 |
| MAP2K1                    | NM_002755.2    | 0     | 0.267301 | 7.536886 | 3.081023 | 0.002278 | 0.012982 | -2.52369 |
| CD47                      | NM_001777.3    | 0     | -0.14662 | 8.84671  | -3.05494 | 0.002479 | 0.013961 | -2.6008  |
| LRP1                      | NM_002332.2    | 0     | 0.312869 | 7.60475  | 3.050507 | 0.002514 | 0.014    | -2.61386 |
| ICAM3                     | NM_002162.3    | 0     | 0.181665 | 9.390235 | 3.026442 | 0.002716 | 0.014954 | -2.68439 |
| PRKCE                     | NM_005400.2    | 0.151 | -0.63034 | 3.082404 | -3.00676 | 0.002892 | 0.015745 | -2.74167 |
| KIR_Inhibiting_Subgroup_2 | NM_014511.3    | 0.466 | -0.70009 | 1.691103 | -3.001   | 0.002945 | 0.01586  | -2.75837 |
| MEFV                      | NM_000243.2    | 0.003 | 0.406438 | 7.319955 | 2.992718 | 0.003024 | 0.015956 | -2.78234 |
| IFNG                      | NM_000619.2    | 0.007 | 0.55437  | 6.625883 | 2.99223  | 0.003028 | 0.015956 | -2.78375 |
| PYCARD                    | NM_013258.3    | 0     | 0.28966  | 7.013016 | 2.98793  | 0.00307  | 0.016003 | -2.79616 |
| ITGA5                     | NM_002205.2    | 0     | 0.225765 | 7.295539 | 2.938682 | 0.003584 | 0.018487 | -2.93715 |
| OAS3                      | NM_006187.2    | 0.024 | -0.67505 | 5.979037 | -2.92645 | 0.003723 | 0.018944 | -2.97182 |
| PIK3CD                    | NM_005026.3    | 0     | 0.269563 | 7.459838 | 2.924165 | 0.00375  | 0.018944 | -2.97829 |
| PAX5                      | NM_016734.1    | 0.178 | -0.81488 | 3.896755 | -2.90305 | 0.004004 | 0.02002  | -3.03778 |
| NLRC5                     | NM_032206.4    | 0.003 | 0.327928 | 7.113546 | 2.895917 | 0.004093 | 0.02026  | -3.05779 |
| CD27                      | NM_001242.4    | 0.031 | 0.552271 | 5.303214 | 2.868439 | 0.004454 | 0.021588 | -3.13443 |
| REPS1                     | NM_001128617.2 | 0     | -0.23993 | 7.134522 | -2.86672 | 0.004478 | 0.021588 | -3.13921 |
| TYK2                      | NM_003331.3    | 0     | 0.222789 | 6.65378  | 2.865558 | 0.004494 | 0.021588 | -3.14243 |
| BAX                       | NM_138761.3    | 0     | 0.14886  | 8.163919 | 2.84639  | 0.004765 | 0.022668 | -3.19543 |
| CD6                       | NM_006725.3    | 0.014 | 0.434557 | 6.383183 | 2.829149 | 0.005021 | 0.023657 | -3.24283 |
| NOD2                      | NM_022162.1    | 0     | 0.30178  | 6.60489  | 2.823654 | 0.005105 | 0.023826 | -3.25787 |
| PRF1                      | NM_005041.3    | 0.007 | -0.49842 | 8.437403 | -2.80111 | 0.005465 | 0.025263 | -3.31933 |
| JAK2                      | NM_004972.2    | 0     | 0.249047 | 7.932236 | 2.796542 | 0.005541 | 0.025358 | -3.33171 |
| NCF4                      | NM_000631.4    | 0     | 0.371764 | 7.36641  | 2.793273 | 0.005595 | 0.025358 | -3.34057 |
| CAMP                      | NM_004345.3    | 0.253 | -0.81128 | 2.845462 | -2.78954 | 0.005658 | 0.025358 | -3.35066 |
| XCL2                      | NM_003175.3    | 0.038 | -0.59723 | 5.62487  | -2.78752 | 0.005693 | 0.025358 | -3.35614 |
| NFATC1                    | NM_172389.1    | 0.007 | -0.2985  | 5.23277  | -2.76644 | 0.006063 | 0.026764 | -3.4129  |
| APP                       | NM_000484.3    | 0     | 0.23494  | 7.901192 | 2.761502 | 0.006153 | 0.026918 | -3.42615 |
| HCK                       | NM_002110.2    | 0     | 0.320142 | 9.069937 | 2.748681 | 0.006392 | 0.027715 | -3.46042 |
| CD99                      | NM_002414.3    | 0     | 0.211892 | 10.01378 | 2.717751 | 0.007003 | 0.030091 | -3.54249 |



|         |                |       |          |          |          |          |          |          |
|---------|----------------|-------|----------|----------|----------|----------|----------|----------|
| MYD88   | NM_002468.3    | 0     | 0.238502 | 8.563028 | 2.714866 | 0.007062 | 0.030091 | -3.5501  |
| GPI     | NM_000175.2    | 0     | 0.158869 | 7.81144  | 2.709321 | 0.007178 | 0.030321 | -3.5647  |
| TOLLIP  | NM_019009.2    | 0.01  | 0.297228 | 5.198327 | 2.690139 | 0.007592 | 0.031796 | -3.615   |
| MAP2K2  | NM_030662.2    | 0     | 0.17964  | 8.356256 | 2.685174 | 0.007703 | 0.031986 | -3.62797 |
| GTF3C1  | NM_001520.3    | 0.007 | 0.246212 | 5.445361 | 2.677614 | 0.007874 | 0.032423 | -3.64766 |
| SH2D1A  | NM_001114937.2 | 0.024 | 0.465125 | 5.74523  | 2.67069  | 0.008034 | 0.032805 | -3.66566 |
| LAMP1   | NM_005561.3    | 0     | 0.145852 | 8.754433 | 2.650769 | 0.00851  | 0.034463 | -3.71719 |
| CD3G    | NM_000073.2    | 0.021 | 0.499929 | 6.111588 | 2.645475 | 0.008641 | 0.034706 | -3.73082 |
| GZMH    | NM_033423.3    | 0.007 | 0.502992 | 8.230464 | 2.619782 | 0.009302 | 0.036877 | -3.7966  |
| CD38    | NM_001775.2    | 0.007 | -0.4401  | 5.552394 | -2.61708 | 0.009374 | 0.036877 | -3.80349 |
| CLEC4A  | NM_194448.2    | 0     | 0.249446 | 7.873964 | 2.615834 | 0.009407 | 0.036877 | -3.80666 |
| CD274   | NM_014143.3    | 0.469 | 0.643583 | 1.515544 | 2.61043  | 0.009553 | 0.037152 | -3.8204  |
| ICOSLG  | NM_015259.4    | 0.055 | -0.52573 | 4.973823 | -2.60391 | 0.009732 | 0.037551 | -3.83695 |
| FCGR1A  | NM_000566.3    | 0.202 | 0.549029 | 2.38127  | 2.562312 | 0.010947 | 0.041905 | -3.94155 |
| PLAUR   | NM_001005376.1 | 0     | 0.326902 | 9.382228 | 2.553371 | 0.011225 | 0.042013 | -3.96383 |
| LILRB2  | NM_005874.1    | 0     | 0.245869 | 7.646844 | 2.552178 | 0.011262 | 0.042013 | -3.96679 |
| TLR8    | NM_016610.2    | 0.014 | 0.36324  | 5.396971 | 2.551389 | 0.011287 | 0.042013 | -3.96876 |
| DUSP6   | NM_001946.2    | 0     | 0.361146 | 8.345518 | 2.550419 | 0.011318 | 0.042013 | -3.97116 |
| CLEC4C  | NM_203503.1    | 0.455 | -0.58754 | 1.61876  | -2.5388  | 0.011691 | 0.043073 | -3.99996 |
| IKBKG   | NM_003639.2    | 0.003 | 0.239628 | 6.347981 | 2.529468 | 0.011999 | 0.043878 | -4.02301 |
| IL2RB   | NM_000878.2    | 0.014 | -0.40458 | 7.075061 | -2.52224 | 0.012243 | 0.044436 | -4.04081 |
| LILRA1  | NM_006863.1    | 0.038 | 0.503271 | 5.249274 | 2.508556 | 0.012716 | 0.045698 | -4.07436 |
| TNFSF12 | NM_003809.2    | 0     | 0.219304 | 7.404735 | 2.506818 | 0.012777 | 0.045698 | -4.07861 |
| CTSW    | NM_001335.3    | 0.003 | -0.3448  | 7.625144 | -2.49979 | 0.013027 | 0.046256 | -4.09577 |
| TAL1    | NM_003189.2    | 0.058 | 0.57327  | 4.306962 | 2.474891 | 0.013949 | 0.049172 | -4.15616 |
| CTSH    | NM_004390.3    | 0     | 0.239789 | 8.795855 | 2.469389 | 0.01416  | 0.049319 | -4.16943 |
| CD4     | NM_000616.4    | 0     | 0.255158 | 7.792406 | 2.468574 | 0.014192 | 0.049319 | -4.1714  |
| CD3E    | NM_000733.2    | 0.003 | 0.336242 | 7.960763 | 2.45971  | 0.014539 | 0.049957 | -4.19271 |
| FPR2    | NM_001462.3    | 0.041 | 0.544979 | 5.147605 | 2.456968 | 0.014648 | 0.049957 | -4.19929 |
| ITGAX   | NM_000887.3    | 0     | 0.224065 | 9.114923 | 2.456127 | 0.014681 | 0.049957 | -4.2013  |

|          |                |       |          |          |          |          |          |          |
|----------|----------------|-------|----------|----------|----------|----------|----------|----------|
| CSF2RB   | NM_000395.2    | 0     | 0.352959 | 8.605077 | 2.428805 | 0.015809 | 0.053423 | -4.26644 |
| CCL3     | NM_002983.2    | 0     | -0.33221 | 9.06783  | -2.41761 | 0.016293 | 0.054681 | -4.29294 |
| SBNO2    | NM_014963.2    | 0.003 | 0.324087 | 6.477355 | 2.40959  | 0.016647 | 0.05549  | -4.31183 |
| ISG20    | NM_002201.4    | 0     | -0.24452 | 7.838453 | -2.39845 | 0.017151 | 0.056784 | -4.338   |
| TBX21    | NM_013351.1    | 0.007 | -0.36026 | 6.936496 | -2.3861  | 0.017725 | 0.058291 | -4.36686 |
| CXCL2    | NM_002089.3    | 0.058 | 0.743106 | 6.138127 | 2.380986 | 0.017968 | 0.058441 | -4.37876 |
| GZMA     | NM_006144.2    | 0.01  | 0.476721 | 8.236576 | 2.377494 | 0.018135 | 0.058441 | -4.38688 |
| CCR2     | NM_001123041.2 | 0.175 | 0.694222 | 3.44741  | 2.377374 | 0.018141 | 0.058441 | -4.38716 |
| STAT4    | NM_003151.2    | 0.003 | -0.31897 | 6.168636 | -2.37515 | 0.018248 | 0.058441 | -4.39232 |
| CD55     | NM_000574.3    | 0.264 | 0.5755   | 2.574407 | 2.369065 | 0.018545 | 0.059006 | -4.40643 |
| TNFSF4   | NM_003326.2    | 0.007 | 0.385024 | 4.998437 | 2.365422 | 0.018724 | 0.059193 | -4.41486 |
| CCL4     | NM_002984.2    | 0     | -0.43388 | 7.435982 | -2.35957 | 0.019016 | 0.05973  | -4.42838 |
| BCL2     | NM_000657.2    | 0     | -0.25148 | 5.932649 | -2.35611 | 0.01919  | 0.059892 | -4.43634 |
| TICAM2   | NM_021649.4    | 0.158 | 0.530881 | 3.007295 | 2.347055 | 0.019653 | 0.060949 | -4.45717 |
| RUNX1    | NM_001754.4    | 0     | 0.202637 | 6.612867 | 2.342903 | 0.019869 | 0.06123  | -4.46669 |
| ECSIT    | NM_001142464.2 | 0.003 | 0.264785 | 5.140958 | 2.33816  | 0.020117 | 0.061609 | -4.47754 |
| MAPK14   | NM_001315.1    | 0     | 0.299062 | 8.18495  | 2.331188 | 0.020488 | 0.061995 | -4.49346 |
| GZMB     | NM_004131.3    | 0.003 | -0.35074 | 8.566658 | -2.33103 | 0.020496 | 0.061995 | -4.49383 |
| LCK      | NM_005356.2    | 0.003 | 0.285389 | 7.600179 | 2.320101 | 0.021089 | 0.063397 | -4.51868 |
| CTLA4    | NM_005214.3    | 0.01  | 0.365911 | 5.860546 | 2.303732 | 0.022006 | 0.065749 | -4.5557  |
| FCGR3A   | NM_000569.6    | 0     | -0.32026 | 8.819493 | -2.27467 | 0.023719 | 0.070437 | -4.62082 |
| PRKCD    | NM_006254.3    | 0     | 0.237448 | 8.691483 | 2.269047 | 0.024063 | 0.07103  | -4.63332 |
| CD160    | NM_007053.2    | 0.171 | -0.62107 | 3.418159 | -2.26458 | 0.02434  | 0.071418 | -4.64325 |
| SYK      | NM_003177.3    | 0     | 0.2308   | 7.845749 | 2.26224  | 0.024486 | 0.071418 | -4.64842 |
| BTK      | NM_000061.1    | 0     | 0.188386 | 6.738055 | 2.236171 | 0.026166 | 0.075303 | -4.70585 |
| CCL3L1   | NM_021006.4    | 0     | -0.30834 | 8.932008 | -2.23611 | 0.026171 | 0.075303 | -4.70599 |
| TNFRSF1A | NM_001065.2    | 0     | 0.208707 | 7.604868 | 2.234478 | 0.026279 | 0.075303 | -4.70955 |
| TLR6     | NM_006068.2    | 0.024 | 0.347632 | 4.722826 | 2.2291   | 0.026639 | 0.075891 | -4.72131 |
| MAPK1    | NM_138957.2    | 0     | 0.163464 | 8.063744 | 2.226368 | 0.026824 | 0.075973 | -4.72727 |
| CD68     | NM_001251.2    | 0     | 0.198991 | 9.788476 | 2.224096 | 0.026978 | 0.075973 | -4.73223 |

|           |                |       |          |          |          |          |          |          |
|-----------|----------------|-------|----------|----------|----------|----------|----------|----------|
| PECAM1    | NM_000442.3    | 0     | 0.179892 | 9.144289 | 2.198016 | 0.028806 | 0.08009  | -4.78874 |
| CXCR3     | NM_001504.1    | 0.11  | 0.475396 | 3.638518 | 2.194281 | 0.029077 | 0.08009  | -4.79678 |
| ARG1      | NM_000045.2    | 0.408 | 0.691967 | 2.243983 | 2.194138 | 0.029087 | 0.08009  | -4.79708 |
| FCGR2A    | NM_021642.3    | 0     | 0.28213  | 9.886013 | 2.194039 | 0.029094 | 0.08009  | -4.7973  |
| NLRP3     | NM_001079821.2 | 0     | 0.291763 | 7.913347 | 2.186845 | 0.029621 | 0.081086 | -4.81275 |
| PSMB8     | NM_004159.4    | 0     | 0.143517 | 8.709897 | 2.178847 | 0.030217 | 0.082258 | -4.82986 |
| SLAMF1    | NM_003037.2    | 0.205 | 0.489197 | 2.599121 | 2.167578 | 0.031074 | 0.084124 | -4.85388 |
| F13A1     | NM_000129.3    | 0     | 0.333896 | 9.569633 | 2.14357  | 0.03297  | 0.088767 | -4.90464 |
| TNFRSF13C | NM_052945.3    | 0.045 | -0.53199 | 6.038428 | -2.1378  | 0.033441 | 0.08954  | -4.91675 |
| C3AR1     | NM_004054.2    | 0.147 | 0.556983 | 3.763189 | 2.097793 | 0.036863 | 0.097599 | -4.99991 |
| FUT7      | NM_004479.3    | 0.058 | 0.501392 | 4.629216 | 2.097493 | 0.03689  | 0.097599 | -5.00053 |
| CD53      | NM_001040033.1 | 0     | 0.149053 | 10.1139  | 2.095727 | 0.037048 | 0.097599 | -5.00416 |
| THBD      | NM_000361.2    | 0.003 | 0.439923 | 8.640481 | 2.090443 | 0.037523 | 0.098323 | -5.01502 |
| DPP4      | NM_001935.3    | 0.366 | 0.461306 | 1.721784 | 2.084983 | 0.03802  | 0.098805 | -5.02621 |
| CD5       | NM_014207.2    | 0.007 | 0.28897  | 7.202144 | 2.084002 | 0.03811  | 0.098805 | -5.02822 |
| RIPK2     | NM_003821.5    | 0     | 0.250255 | 8.656458 | 2.074521 | 0.038989 | 0.099953 | -5.04758 |
| RPS6      | NM_001010.2    | 0     | -0.1768  | 12.82758 | -2.07334 | 0.0391   | 0.099953 | -5.04999 |
| ITGA2B    | NM_000419.3    | 0     | 0.365633 | 7.925738 | 2.072638 | 0.039165 | 0.099953 | -5.05141 |
| TLR5      | NM_003268.3    | 0.202 | 0.531728 | 3.00475  | 2.064061 | 0.039978 | 0.101348 | -5.06884 |
| FYN       | NM_002037.3    | 0     | 0.164473 | 8.537363 | 2.062514 | 0.040126 | 0.101348 | -5.07197 |
| CKLF      | NM_181640.2    | 0     | 0.291154 | 7.308658 | 2.059725 | 0.040394 | 0.101502 | -5.07762 |
| TLR2      | NM_003264.3    | 0     | 0.266334 | 7.639966 | 2.049766 | 0.041364 | 0.103409 | -5.09772 |
| ATG7      | NM_001136031.2 | 0.014 | 0.358224 | 5.433937 | 2.035535 | 0.042784 | 0.106417 | -5.12629 |
| IL1R2     | NM_173343.1    | 0.027 | 0.675714 | 5.976301 | 2.026329 | 0.043725 | 0.108208 | -5.14466 |
| TNFRSF9   | NM_001561.4    | 0.329 | 0.432551 | 1.935197 | 2.014698 | 0.044938 | 0.110212 | -5.16776 |
| SMAD2     | NM_005901.5    | 0     | 0.138294 | 6.605892 | 2.014261 | 0.044985 | 0.110212 | -5.16862 |
| CD9       | NM_001769.2    | 0     | 0.290111 | 6.234418 | 2.011642 | 0.045262 | 0.11034  | -5.17381 |
| SIGIRR    | NM_021805.2    | 0.007 | 0.233946 | 6.441101 | 2.005464 | 0.045922 | 0.111395 | -5.18601 |
| CASP1     | NM_001223.3    | 0     | 0.202287 | 8.02859  | 1.993983 | 0.04717  | 0.113353 | -5.20858 |
| IKBKE     | NM_014002.2    | 0.027 | 0.386498 | 5.211535 | 1.993788 | 0.047192 | 0.113353 | -5.20896 |

|          |                |       |          |          |          |          |          |          |
|----------|----------------|-------|----------|----------|----------|----------|----------|----------|
| NUP107   | NM_020401.2    | 0.003 | -0.15193 | 5.14324  | -1.9827  | 0.048425 | 0.115603 | -5.23064 |
| LGALS3   | NM_001177388.1 | 0     | 0.245447 | 9.566068 | 1.981146 | 0.0486   | 0.115603 | -5.23367 |
| PIK3CG   | NM_002649.2    | 0.003 | 0.181245 | 7.079316 | 1.973193 | 0.049504 | 0.117184 | -5.24914 |
| LILRA5   | NM_181879.2    | 0     | 0.230913 | 9.279045 | 1.967672 | 0.05014  | 0.118119 | -5.25984 |
| TNFSF13B | NM_006573.4    | 0.003 | 0.296887 | 6.505515 | 1.96088  | 0.050932 | 0.118925 | -5.27296 |
| BTLA     | NM_181780.2    | 0.034 | -0.39411 | 4.895995 | -1.96057 | 0.050968 | 0.118925 | -5.27355 |
| BLNK     | NM_013314.2    | 0.432 | -0.46884 | 1.715381 | -1.95816 | 0.051252 | 0.11902  | -5.2782  |
| MERTK    | NM_006343.2    | 0.171 | 0.43155  | 2.826829 | 1.936018 | 0.05392  | 0.124628 | -5.32062 |
| CSF1     | NM_000757.4    | 0.236 | 0.519842 | 2.980229 | 1.925146 | 0.055273 | 0.127153 | -5.34128 |
| LILRB3   | NM_006864.2    | 0     | 0.287106 | 7.73877  | 1.869507 | 0.062646 | 0.143443 | -5.44523 |
| IL2RA    | NM_000417.1    | 0.318 | -0.39047 | 1.886076 | -1.86306 | 0.063552 | 0.144839 | -5.45708 |
| MIF      | NM_002415.1    | 0     | -0.13941 | 8.121836 | -1.85721 | 0.064382 | 0.145623 | -5.4678  |
| CD86     | NM_175862.3    | 0.024 | 0.314964 | 5.845976 | 1.856451 | 0.06449  | 0.145623 | -5.46919 |
| IGF2R    | NM_000876.1    | 0.003 | 0.217785 | 6.933908 | 1.850033 | 0.065413 | 0.146586 | -5.48091 |
| STAT6    | NM_003153.3    | 0     | 0.177015 | 9.220851 | 1.84933  | 0.065515 | 0.146586 | -5.48219 |
| HLA-DRB3 | NM_022555.3    | 0     | 0.16786  | 11.31087 | 1.834446 | 0.0677   | 0.150786 | -5.5092  |
| ANP32B   | NM_006401.2    | 0     | 0.159597 | 8.430959 | 1.831395 | 0.068155 | 0.151113 | -5.51472 |
| IFI27    | NM_005532.3    | 0.202 | -0.84351 | 4.944098 | -1.82081 | 0.069755 | 0.153963 | -5.53377 |
| CD63     | NM_001780.4    | 0     | 0.187677 | 9.740343 | 1.815047 | 0.070638 | 0.154492 | -5.5441  |
| MAP2K4   | NM_003010.2    | 0.171 | 0.402001 | 2.860254 | 1.813294 | 0.070909 | 0.154492 | -5.54723 |
| LAMP2    | NM_001122606.1 | 0     | 0.138036 | 7.314486 | 1.81309  | 0.07094  | 0.154492 | -5.54759 |
| SELL     | NR_029467.1    | 0     | 0.231525 | 9.719688 | 1.807002 | 0.071887 | 0.155862 | -5.55846 |
| CARD11   | NM_032415.2    | 0     | -0.17702 | 6.856218 | -1.8031  | 0.072499 | 0.156496 | -5.5654  |
| CCR4     | NM_005508.4    | 0.062 | 0.360719 | 4.225344 | 1.792409 | 0.074199 | 0.159463 | -5.58435 |
| STAT3    | NM_139276.2    | 0     | 0.131285 | 8.852237 | 1.790312 | 0.074536 | 0.159488 | -5.58806 |
| CCR7     | NM_001838.2    | 0.113 | -0.40158 | 3.873809 | -1.76406 | 0.078865 | 0.167157 | -5.63407 |
| CSF1R    | NM_005211.2    | 0.164 | 0.448694 | 3.669342 | 1.763889 | 0.078894 | 0.167157 | -5.63437 |
| BCL10    | NM_003921.2    | 0     | -0.1225  | 8.121733 | -1.76241 | 0.079144 | 0.167157 | -5.63694 |
| MAVS     | NM_020746.3    | 0.031 | 0.281078 | 4.40858  | 1.758621 | 0.079787 | 0.167793 | -5.64352 |
| CD1D     | NM_001766.3    | 0     | 0.196275 | 6.7726   | 1.739177 | 0.083156 | 0.174129 | -5.67708 |

|           |                |       |          |          |          |          |          |          |
|-----------|----------------|-------|----------|----------|----------|----------|----------|----------|
| IL12RB1   | NM_005535.1    | 0     | 0.147886 | 5.68807  | 1.734363 | 0.084007 | 0.175164 | -5.68533 |
| PPBP      | NM_002704.2    | 0     | 0.291871 | 11.85189 | 1.731233 | 0.084565 | 0.17558  | -5.69068 |
| CD59      | NM_000611.4    | 0     | -0.25373 | 6.047519 | -1.72094 | 0.08642  | 0.17799  | -5.70822 |
| ABL1      | NM_005157.3    | 0.014 | -0.20131 | 4.733803 | -1.71954 | 0.086674 | 0.17799  | -5.71058 |
| CSF3R     | NM_156038.2    | 0     | 0.266759 | 10.23874 | 1.718767 | 0.086815 | 0.17799  | -5.7119  |
| PTGS2     | NM_000963.1    | 0.034 | 0.457425 | 6.713789 | 1.71658  | 0.087215 | 0.178064 | -5.71561 |
| CD58      | NM_001779.2    | 0     | 0.134737 | 7.622745 | 1.714148 | 0.087662 | 0.178233 | -5.71973 |
| MME       | NM_000902.2    | 0.216 | 0.601901 | 4.285765 | 1.706816 | 0.089018 | 0.180244 | -5.73211 |
| CMKLR1    | NM_004072.1    | 0.301 | -0.46717 | 2.531657 | -1.6984  | 0.090597 | 0.182685 | -5.74625 |
| HLA-DMA   | NM_006120.3    | 0     | 0.141123 | 8.650773 | 1.684709 | 0.093213 | 0.187189 | -5.76912 |
| ITGAL     | NM_002209.2    | 0     | 0.137909 | 8.40379  | 1.668326 | 0.096423 | 0.191015 | -5.79624 |
| ICOS      | NM_012092.2    | 0.048 | 0.346148 | 5.292234 | 1.667893 | 0.096509 | 0.191015 | -5.79696 |
| NFKB2     | NM_002502.2    | 0     | -0.2444  | 9.49988  | -1.66707 | 0.096672 | 0.191015 | -5.79831 |
| CD200     | NM_005944.5    | 0.226 | -0.3983  | 2.696199 | -1.66705 | 0.096677 | 0.191015 | -5.79835 |
| CD83      | NM_004233.3    | 0     | -0.20491 | 10.15734 | -1.66437 | 0.097212 | 0.191301 | -5.80276 |
| ITGB3     | NM_000212.2    | 0.003 | 0.324411 | 6.991195 | 1.659975 | 0.098093 | 0.192262 | -5.80997 |
| TICAM1    | NM_014261.1    | 0.003 | -0.18054 | 6.452073 | -1.63835 | 0.102525 | 0.200149 | -5.8452  |
| TNFRSF10C | NM_003841.3    | 0.106 | 0.524647 | 5.144526 | 1.630503 | 0.104174 | 0.20256  | -5.85788 |
| INPP5D    | NM_005541.3    | 0     | 0.101407 | 7.592274 | 1.62661  | 0.104999 | 0.203358 | -5.86414 |
| MAP3K1    | NM_005921.1    | 0     | -0.09879 | 8.030733 | -1.61473 | 0.107549 | 0.207477 | -5.88316 |
| CD79A     | NM_001783.3    | 0.003 | -0.32874 | 7.378975 | -1.60655 | 0.109334 | 0.210093 | -5.89618 |
| CD81      | NM_004356.3    | 0     | 0.108501 | 9.013876 | 1.600666 | 0.110633 | 0.211759 | -5.90552 |
| SELPLG    | NM_001206609.1 | 0     | 0.217235 | 7.156874 | 1.571082 | 0.117347 | 0.223736 | -5.9519  |
| CARD9     | NM_052813.4    | 0.089 | 0.337109 | 4.2204   | 1.564369 | 0.118915 | 0.225263 | -5.96231 |
| STAT1     | NM_007315.2    | 0     | 0.176626 | 8.891621 | 1.563336 | 0.119157 | 0.225263 | -5.9639  |
| TXNIP     | NM_006472.1    | 0     | -0.13231 | 12.29742 | -1.56177 | 0.119527 | 0.225263 | -5.96633 |
| CXCR4     | NM_003467.2    | 0     | -0.16252 | 11.62269 | -1.55761 | 0.120509 | 0.226243 | -5.97274 |
| PSMB9     | NM_002800.4    | 0     | 0.176752 | 8.658391 | 1.553184 | 0.121563 | 0.227351 | -5.97955 |
| LILRB1    | NM_001081637.1 | 0.007 | 0.249265 | 6.524287 | 1.547335 | 0.122966 | 0.228235 | -5.98852 |
| CYLD      | NM_015247.1    | 0     | -0.11888 | 8.50695  | -1.54552 | 0.123405 | 0.228235 | -5.9913  |

|          |             |       |          |          |          |          |          |          |
|----------|-------------|-------|----------|----------|----------|----------|----------|----------|
| IRF3     | NM_001571.5 | 0.01  | 0.166218 | 5.322492 | 1.5454   | 0.123433 | 0.228235 | -5.99148 |
| CXCL3    | NM_002090.2 | 0.267 | 0.533637 | 3.587643 | 1.540035 | 0.124736 | 0.229776 | -5.99966 |
| C2       | NM_000063.3 | 0.243 | 0.378901 | 2.578399 | 1.532053 | 0.126693 | 0.232507 | -6.01179 |
| TNFRSF8  | NM_152942.2 | 0.373 | -0.32676 | 1.712385 | -1.5224  | 0.129092 | 0.236026 | -6.02638 |
| CASP3    | NM_032991.2 | 0.007 | -0.16381 | 5.030588 | -1.51277 | 0.131521 | 0.239573 | -6.04084 |
| BST2     | NM_004335.2 | 0     | -0.15642 | 6.971434 | -1.50811 | 0.132709 | 0.240843 | -6.04781 |
| IL10RA   | NM_001558.2 | 0     | 0.099196 | 9.67183  | 1.501943 | 0.134293 | 0.242818 | -6.05699 |
| CD244    | NM_016382.2 | 0.017 | 0.227955 | 6.020149 | 1.490724 | 0.137214 | 0.247187 | -6.0736  |
| CHUK     | NM_001278.3 | 0     | 0.140904 | 6.720205 | 1.484485 | 0.138859 | 0.249235 | -6.08279 |
| HLA-DRA  | NM_019111.3 | 0     | 0.130451 | 12.5209  | 1.470147 | 0.142699 | 0.255191 | -6.10375 |
| TAP2     | NM_000544.3 | 0     | 0.12125  | 7.793236 | 1.44842  | 0.148672 | 0.264907 | -6.13514 |
| SMAD3    | NM_005902.3 | 0     | -0.16599 | 6.376146 | -1.44312 | 0.150158 | 0.266585 | -6.14273 |
| TIGIT    | NM_173799.2 | 0.096 | 0.321056 | 3.561425 | 1.44107  | 0.150736 | 0.266645 | -6.14566 |
| JAM3     | NM_032801.3 | 0.027 | 0.310485 | 4.903156 | 1.430013 | 0.153882 | 0.270679 | -6.16138 |
| CTSL     | NM_001912.4 | 0.205 | 0.373504 | 2.912495 | 1.428553 | 0.154301 | 0.270679 | -6.16345 |
| IL18R1   | NM_003855.2 | 0.106 | 0.364047 | 3.790822 | 1.427258 | 0.154674 | 0.270679 | -6.16528 |
| RUNX3    | NM_004350.1 | 0     | -0.15498 | 8.954162 | -1.41944 | 0.156937 | 0.273363 | -6.1763  |
| CEBPB    | NM_005194.2 | 0     | 0.15375  | 9.52179  | 1.418114 | 0.157323 | 0.273363 | -6.17816 |
| PIN1     | NM_006221.2 | 0     | 0.093019 | 6.588471 | 1.405379 | 0.161071 | 0.278886 | -6.19597 |
| NOTCH1   | NM_017617.3 | 0.007 | 0.177519 | 6.163288 | 1.401063 | 0.162356 | 0.279916 | -6.20197 |
| LTB      | NM_002341.1 | 0     | 0.168483 | 9.500478 | 1.39955  | 0.162808 | 0.279916 | -6.20407 |
| ETS1     | NM_005238.3 | 0     | -0.1474  | 9.109918 | -1.39095 | 0.165397 | 0.282395 | -6.21595 |
| PLAU     | NM_002658.2 | 0.226 | 0.552814 | 4.195883 | 1.390934 | 0.165403 | 0.282395 | -6.21598 |
| LAIR2    | NM_002288.3 | 0.014 | -0.22649 | 4.845662 | -1.38641 | 0.166779 | 0.283756 | -6.22221 |
| JAK1     | NM_002227.1 | 0     | -0.05898 | 9.228152 | -1.38147 | 0.168288 | 0.285333 | -6.22898 |
| POU2AF1  | NM_006235.2 | 0.455 | -0.36936 | 1.816663 | -1.37777 | 0.169428 | 0.285652 | -6.23404 |
| CCR1     | NM_001295.2 | 0.007 | 0.220317 | 6.178898 | 1.377075 | 0.169642 | 0.285652 | -6.23499 |
| IKBKB    | NM_001556.1 | 0.024 | 0.227596 | 4.661722 | 1.370672 | 0.171628 | 0.287762 | -6.2437  |
| CD180    | NM_005582.2 | 0.164 | -0.35221 | 3.296288 | -1.36771 | 0.172553 | 0.287762 | -6.24772 |
| HLA-DPB1 | NM_002121.4 | 0     | 0.128797 | 10.31264 | 1.367376 | 0.172657 | 0.287762 | -6.24818 |

|           |                |       |          |          |          |          |          |          |
|-----------|----------------|-------|----------|----------|----------|----------|----------|----------|
| ICAM4     | NM_001039132.1 | 0.068 | 0.27321  | 3.664074 | 1.348974 | 0.178488 | 0.296471 | -6.27295 |
| SOCS1     | NM_003745.1    | 0.024 | 0.252825 | 5.279282 | 1.335089 | 0.182984 | 0.302912 | -6.29142 |
| LTF       | NM_002343.2    | 0.075 | -0.43479 | 5.321943 | -1.32866 | 0.185096 | 0.304678 | -6.29991 |
| IL6       | NM_000600.1    | 0.027 | 0.254807 | 5.194713 | 1.327407 | 0.185508 | 0.304678 | -6.30156 |
| CD97      | NM_078481.2    | 0     | 0.103223 | 10.53952 | 1.324908 | 0.186334 | 0.304678 | -6.30484 |
| TAB1      | NM_153497.2    | 0.027 | 0.201001 | 4.727958 | 1.324294 | 0.186537 | 0.304678 | -6.30565 |
| TLR1      | NM_003263.3    | 0     | 0.133115 | 7.545529 | 1.317599 | 0.188767 | 0.307158 | -6.31442 |
| MFGE8     | NM_001114614.1 | 0.055 | -0.25521 | 3.704272 | -1.31598 | 0.18931  | 0.307158 | -6.31653 |
| PSEN2     | NM_000447.2    | 0.058 | -0.22722 | 3.557444 | -1.30246 | 0.193881 | 0.313536 | -6.33408 |
| FCGR2B    | NM_001002273.1 | 0.048 | -0.2737  | 5.088996 | -1.29084 | 0.197874 | 0.318942 | -6.34902 |
| CD74      | NM_001025159.1 | 0     | 0.097469 | 12.72202 | 1.285973 | 0.199566 | 0.320614 | -6.35525 |
| HLA-DMB   | NM_002118.3    | 0     | 0.128575 | 8.280356 | 1.282529 | 0.200769 | 0.321446 | -6.35963 |
| IFIH1     | NM_022168.2    | 0.003 | 0.184728 | 6.062449 | 1.28074  | 0.201396 | 0.321446 | -6.36191 |
| TNFSF13   | NM_003808.3    | 0     | 0.162787 | 6.691757 | 1.267778 | 0.205981 | 0.32668  | -6.37829 |
| SLAMF6    | NM_001184714.1 | 0.267 | 0.330842 | 2.493996 | 1.266962 | 0.206272 | 0.32668  | -6.37932 |
| NOD1      | NM_006092.1    | 0.082 | -0.2416  | 3.62329  | -1.26584 | 0.206675 | 0.32668  | -6.38073 |
| TNFRSF13B | NM_012452.2    | 0.418 | -0.31274 | 1.686095 | -1.23981 | 0.216135 | 0.340534 | -6.41308 |
| ATG5      | NM_004849.2    | 0     | -0.08647 | 6.209561 | -1.22835 | 0.220397 | 0.346136 | -6.42712 |
| BLK       | NM_001715.2    | 0.12  | -0.28945 | 3.655608 | -1.21111 | 0.226923 | 0.354869 | -6.44798 |
| IL21R     | NM_021798.2    | 0.082 | -0.25475 | 3.908427 | -1.20842 | 0.227953 | 0.354869 | -6.45121 |
| TGFB1     | NM_000660.3    | 0     | 0.096284 | 10.95069 | 1.207962 | 0.22813  | 0.354869 | -6.45176 |
| UBC       | NM_021009.3    | 0     | 0.089996 | 14.08619 | 1.201947 | 0.230449 | 0.357341 | -6.45896 |
| TRAF6     | NM_145803.1    | 0     | -0.09946 | 6.432924 | -1.1894  | 0.235339 | 0.363773 | -6.47385 |
| STAT2     | NM_005419.2    | 0     | 0.144952 | 7.762665 | 1.179109 | 0.239404 | 0.368893 | -6.48595 |
| IL1RN     | NM_000577.3    | 0.003 | -0.23336 | 7.56642  | -1.17574 | 0.240747 | 0.36978  | -6.48989 |
| SERPINB2  | NM_002575.1    | 0.075 | 0.398617 | 5.633046 | 1.17388  | 0.241489 | 0.36978  | -6.49206 |
| IL8       | NM_000584.2    | 0     | 0.238813 | 13.13576 | 1.161298 | 0.246558 | 0.374256 | -6.50664 |
| TAPBP     | NM_003190.4    | 0     | 0.083916 | 9.857129 | 1.160946 | 0.2467   | 0.374256 | -6.50705 |
| PSMD7     | NM_002811.3    | 0     | -0.0742  | 8.443101 | -1.16094 | 0.246704 | 0.374256 | -6.50706 |
| TIRAP     | NM_148910.2    | 0.144 | 0.208686 | 2.624071 | 1.1524   | 0.250187 | 0.37837  | -6.51687 |

|          |                |       |          |          |          |          |          |          |
|----------|----------------|-------|----------|----------|----------|----------|----------|----------|
| MAP4K2   | NM_004579.2    | 0     | -0.07364 | 6.797415 | -1.13127 | 0.258958 | 0.390428 | -6.54083 |
| BCL2L1   | NM_001191.2    | 0     | 0.252998 | 8.230849 | 1.121969 | 0.262883 | 0.395131 | -6.55124 |
| IL6ST    | NM_002184.2    | 0     | 0.089363 | 8.300979 | 1.117016 | 0.264991 | 0.395603 | -6.55674 |
| VEGFA    | NM_001025366.1 | 0     | 0.133195 | 7.925177 | 1.116633 | 0.265155 | 0.395603 | -6.55717 |
| LYN      | NM_002350.1    | 0     | -0.10259 | 8.412352 | -1.11555 | 0.265619 | 0.395603 | -6.55837 |
| EWSR1    | NM_013986.3    | 0     | 0.048272 | 8.235811 | 1.111353 | 0.267416 | 0.396654 | -6.56301 |
| ICAM2    | NM_000873.3    | 0     | -0.11122 | 6.419583 | -1.11012 | 0.267944 | 0.396654 | -6.56437 |
| DUSP4    | NM_057158.2    | 0.164 | 0.307541 | 3.536306 | 1.106762 | 0.269392 | 0.397597 | -6.56807 |
| IRF2     | NM_002199.3    | 0     | 0.125825 | 6.093233 | 1.103807 | 0.27067  | 0.398284 | -6.57131 |
| HLA-B    | NM_005514.6    | 0     | 0.06257  | 13.57856 | 1.099096 | 0.272716 | 0.400092 | -6.57647 |
| HLA-DPA1 | NM_033554.2    | 0     | 0.10823  | 10.29383 | 1.0922   | 0.275729 | 0.402578 | -6.58398 |
| CXCR2    | NM_001557.2    | 0.058 | -0.34404 | 6.028551 | -1.09146 | 0.276054 | 0.402578 | -6.58478 |
| CCL20    | NM_004591.1    | 0.411 | 0.304193 | 1.999293 | 1.08764  | 0.277734 | 0.403827 | -6.58891 |
| C1QB     | NM_000491.3    | 0.195 | 0.313921 | 3.38991  | 1.085578 | 0.278644 | 0.403952 | -6.59114 |
| ITGA6    | NM_000210.1    | 0.062 | -0.22526 | 4.19563  | -1.08271 | 0.279912 | 0.404593 | -6.59423 |
| CD19     | NM_001770.4    | 0.055 | -0.26062 | 4.816248 | -1.07958 | 0.281304 | 0.405409 | -6.59759 |
| IL16     | NM_004513.4    | 0     | -0.06057 | 7.722864 | -1.07575 | 0.283008 | 0.405746 | -6.60169 |
| IFNAR2   | NM_000874.3    | 0     | -0.0721  | 8.301537 | -1.07534 | 0.283194 | 0.405746 | -6.60213 |
| IFI16    | NM_005531.1    | 0     | -0.09556 | 6.908296 | -1.07132 | 0.284994 | 0.407135 | -6.60642 |
| DDX58    | NM_014314.3    | 0.031 | -0.21558 | 5.32417  | -1.03466 | 0.301764 | 0.429839 | -6.64479 |
| ADA      | NM_000022.2    | 0.007 | 0.125845 | 5.724951 | 1.021704 | 0.307845 | 0.43723  | -6.65803 |
| TP53     | NM_000546.2    | 0.014 | 0.160834 | 5.277781 | 1.006197 | 0.315231 | 0.446426 | -6.67366 |
| CTSG     | NM_001911.2    | 0.462 | -0.27137 | 1.792806 | -1.00393 | 0.316323 | 0.446681 | -6.67593 |
| ENG      | NM_001114753.1 | 0.051 | 0.194946 | 4.763187 | 0.98663  | 0.324717 | 0.457216 | -6.69304 |
| IFNAR1   | NM_000629.2    | 0.171 | 0.213625 | 2.674679 | 0.974803 | 0.33054  | 0.46402  | -6.70458 |
| TRAF2    | NM_021138.3    | 0.048 | 0.168356 | 3.923246 | 0.972981 | 0.331443 | 0.46402  | -6.70634 |
| ICAM1    | NM_000201.2    | 0     | 0.146275 | 7.861002 | 0.963163 | 0.336337 | 0.467682 | -6.71579 |
| FCER2    | NM_002002.4    | 0.082 | -0.25436 | 4.805759 | -0.96106 | 0.337389 | 0.467682 | -6.7178  |
| THBS1    | NM_003246.2    | 0     | 0.25518  | 10.2535  | 0.960582 | 0.337631 | 0.467682 | -6.71826 |
| TFE3     | NM_006521.3    | 0.007 | 0.107958 | 4.911264 | 0.960093 | 0.337877 | 0.467682 | -6.71873 |



|         |                |       |          |          |          |          |          |          |
|---------|----------------|-------|----------|----------|----------|----------|----------|----------|
| CD28    | NM_001243078.1 | 0.178 | -0.23537 | 3.234351 | -0.9537  | 0.341096 | 0.469709 | -6.72481 |
| HMGB1   | NM_002128.4    | 0     | 0.052678 | 9.277236 | 0.953384 | 0.341258 | 0.469709 | -6.72511 |
| IRAK2   | NM_001570.3    | 0.021 | 0.1818   | 4.751827 | 0.951481 | 0.34222  | 0.469714 | -6.72692 |
| IL13RA1 | NM_001560.2    | 0     | 0.102063 | 7.233484 | 0.923108 | 0.356784 | 0.488104 | -6.75337 |
| TFRC    | NM_003234.1    | 0     | 0.1063   | 7.850671 | 0.92152  | 0.357611 | 0.488104 | -6.75483 |
| HLA-G   | NM_002127.4    | 0     | 0.06908  | 7.159786 | 0.913162 | 0.361981 | 0.491478 | -6.76246 |
| IL10    | NM_000572.2    | 0.253 | 0.257615 | 2.957527 | 0.912957 | 0.362089 | 0.491478 | -6.76264 |
| C1QA    | NM_015991.2    | 0.127 | -0.21881 | 4.247896 | -0.89677 | 0.370648 | 0.501707 | -6.77721 |
| CXCL16  | NM_001100812.1 | 0.003 | 0.139032 | 7.241422 | 0.891576 | 0.373423 | 0.504069 | -6.78184 |
| SLAMF7  | NM_021181.3    | 0     | -0.10366 | 6.269028 | -0.88419 | 0.377386 | 0.50737  | -6.78836 |
| IL15RA  | NM_002189.2    | 0     | 0.085227 | 5.735257 | 0.883169 | 0.377939 | 0.50737  | -6.78926 |
| POU2F2  | NM_002698.2    | 0.003 | 0.096551 | 6.756974 | 0.875423 | 0.38213  | 0.511595 | -6.79604 |
| CXCR5   | NM_001716.3    | 0.171 | -0.20507 | 3.232261 | -0.87282 | 0.383545 | 0.512091 | -6.7983  |
| EP300   | NM_001429.2    | 0     | 0.061543 | 8.468199 | 0.854861 | 0.393394 | 0.523813 | -6.81374 |
| TNFSF8  | NM_001244.3    | 0.007 | 0.105252 | 5.546341 | 0.851631 | 0.395182 | 0.524767 | -6.81648 |
| C1QBP   | NM_001212.3    | 0     | -0.06452 | 7.336941 | -0.83765 | 0.402978 | 0.533674 | -6.82824 |
| IL2RG   | NM_000206.1    | 0     | 0.086111 | 8.597442 | 0.826763 | 0.409109 | 0.539772 | -6.83726 |
| HLA-E   | NM_005516.4    | 0     | 0.05273  | 11.6039  | 0.825567 | 0.409786 | 0.539772 | -6.83824 |
| IRF1    | NM_002198.1    | 0     | 0.10842  | 10.08568 | 0.811403 | 0.417857 | 0.547776 | -6.84978 |
| CCR3    | NM_001837.2    | 0.455 | 0.184827 | 1.557105 | 0.810982 | 0.418098 | 0.547776 | -6.85012 |
| ADORA2A | NM_000675.3    | 0.003 | 0.15153  | 6.562508 | 0.807525 | 0.420083 | 0.548908 | -6.85291 |
| CLEC7A  | NM_197954.2    | 0     | 0.113574 | 8.481846 | 0.805373 | 0.421321 | 0.549061 | -6.85463 |
| ST6GAL1 | NM_003032.2    | 0.003 | -0.10351 | 7.03997  | -0.8028  | 0.422806 | 0.549536 | -6.8567  |
| BMI1    | NM_005180.5    | 0     | -0.10325 | 7.752925 | -0.78136 | 0.435284 | 0.562806 | -6.8736  |
| RELB    | NM_006509.2    | 0     | -0.0971  | 6.86915  | -0.78131 | 0.435313 | 0.562806 | -6.87364 |
| REL     | NM_002908.2    | 0     | -0.07364 | 7.632005 | -0.77686 | 0.437931 | 0.5647   | -6.8771  |
| CDKN1A  | NM_000389.2    | 0     | 0.081272 | 9.091459 | 0.773701 | 0.439792 | 0.565611 | -6.87953 |
| GZMM    | NM_005317.2    | 0.01  | -0.10206 | 5.841592 | -0.76406 | 0.445508 | 0.571463 | -6.88692 |
| DOCK9   | NM_001130048.1 | 0.024 | -0.11841 | 4.756119 | -0.75865 | 0.448729 | 0.574092 | -6.89101 |
| LY9     | NM_001033667.1 | 0     | -0.07538 | 6.883577 | -0.74605 | 0.456292 | 0.580377 | -6.90045 |

|         |                |       |          |          |          |          |          |          |
|---------|----------------|-------|----------|----------|----------|----------|----------|----------|
| IGF1R   | NM_000875.2    | 0     | -0.11133 | 6.296926 | -0.74591 | 0.456377 | 0.580377 | -6.90056 |
| RORA    | NM_134261.2    | 0.003 | -0.10543 | 6.797615 | -0.74456 | 0.457195 | 0.580377 | -6.90157 |
| MICB    | NM_005931.3    | 0     | -0.05404 | 6.878711 | -0.74203 | 0.458719 | 0.580808 | -6.90343 |
| CX3CR1  | NM_001337.3    | 0.021 | 0.185298 | 5.610803 | 0.72505  | 0.469056 | 0.589108 | -6.91584 |
| PNMA1   | NM_006029.4    | 0     | 0.074089 | 5.465363 | 0.721493 | 0.471238 | 0.589108 | -6.9184  |
| HLA-A   | NM_002116.5    | 0     | 0.043542 | 13.45711 | 0.721279 | 0.471369 | 0.589108 | -6.91856 |
| KLRK1   | NM_007360.3    | 0.007 | 0.099749 | 8.067134 | 0.721143 | 0.471452 | 0.589108 | -6.91865 |
| IL23A   | NM_016584.2    | 0.291 | -0.16181 | 1.983131 | -0.71953 | 0.472446 | 0.589108 | -6.91981 |
| TCF7    | NM_003202.2    | 0.021 | 0.132013 | 7.021768 | 0.719457 | 0.472488 | 0.589108 | -6.91986 |
| MSR1    | NM_002445.3    | 0.082 | 0.182315 | 4.379792 | 0.704504 | 0.481733 | 0.599109 | -6.93047 |
| FOXJ1   | NM_001454.3    | 0     | -0.08887 | 5.448176 | -0.68943 | 0.491154 | 0.609279 | -6.94094 |
| HAVCR2  | NM_032782.3    | 0.014 | 0.09501  | 5.285496 | 0.661639 | 0.508773 | 0.629542 | -6.95964 |
| NFATC2  | NM_012340.3    | 0     | -0.06476 | 7.254581 | -0.65178 | 0.515106 | 0.635773 | -6.96609 |
| CD37    | NM_001774.2    | 0.003 | -0.05473 | 7.4318   | -0.64921 | 0.516759 | 0.636176 | -6.96775 |
| S100B   | NM_006272.1    | 0.5   | 0.169354 | 1.716099 | 0.647246 | 0.518029 | 0.636176 | -6.96902 |
| TREM1   | NM_018643.3    | 0     | 0.104434 | 9.971133 | 0.639519 | 0.523033 | 0.640716 | -6.97398 |
| IL18RAP | NM_003853.2    | 0.065 | -0.17737 | 4.95418  | -0.63668 | 0.524878 | 0.641067 | -6.97578 |
| CYFIP2  | NM_001037332.2 | 0     | 0.051621 | 7.800324 | 0.635054 | 0.525937 | 0.641067 | -6.97681 |
| CD40LG  | NM_000074.2    | 0.082 | 0.131066 | 3.887451 | 0.610916 | 0.541774 | 0.658296 | -6.9918  |
| TAP1    | NM_000593.5    | 0     | 0.057792 | 7.406064 | 0.607463 | 0.544059 | 0.658296 | -6.9939  |
| NFATC3  | NM_004555.2    | 0     | -0.04096 | 6.85298  | -0.60452 | 0.546011 | 0.658296 | -6.99567 |
| FLT3LG  | NM_001459.3    | 0     | 0.055733 | 7.150165 | 0.603496 | 0.546691 | 0.658296 | -6.99629 |
| CXCL5   | NM_002994.3    | 0.027 | 0.135741 | 5.612661 | 0.603349 | 0.546788 | 0.658296 | -6.99638 |
| IL3RA   | NM_002183.2    | 0.161 | 0.13334  | 2.90557  | 0.595084 | 0.552291 | 0.663291 | -7.00131 |
| HLA-C   | NM_002117.4    | 0     | 0.040013 | 12.6451  | 0.590276 | 0.555505 | 0.665519 | -7.00415 |
| PSEN1   | NM_000021.2    | 0     | 0.038059 | 6.638653 | 0.579943 | 0.562442 | 0.672187 | -7.01018 |
| TNFAIP3 | NM_006290.2    | 0     | 0.078881 | 11.40526 | 0.577028 | 0.564406 | 0.672893 | -7.01186 |
| CREB1   | NM_004379.3    | 0     | -0.04851 | 5.91797  | -0.53694 | 0.591756 | 0.703787 | -7.03412 |
| ATF1    | NM_005171.2    | 0.007 | -0.05594 | 5.483778 | -0.529   | 0.597247 | 0.707297 | -7.03834 |
| IRAK4   | NM_016123.1    | 0.007 | 0.058234 | 5.477751 | 0.528496 | 0.597594 | 0.707297 | -7.0386  |

|          |                |       |          |          |          |          |          |          |
|----------|----------------|-------|----------|----------|----------|----------|----------|----------|
| IRF8     | NM_002163.2    | 0     | -0.04601 | 7.381763 | -0.51217 | 0.608956 | 0.718601 | -7.04707 |
| TLR10    | NM_030956.2    | 0.096 | 0.10918  | 3.325336 | 0.509452 | 0.610856 | 0.718601 | -7.04846 |
| ATG16L1  | NM_198890.2    | 0.007 | 0.056687 | 5.877359 | 0.506868 | 0.612666 | 0.718601 | -7.04977 |
| IL11RA   | NM_147162.1    | 0.161 | 0.11266  | 3.040718 | 0.506376 | 0.61301  | 0.718601 | -7.05002 |
| IL7R     | NM_002185.2    | 0.01  | 0.078198 | 7.407723 | 0.483232 | 0.629327 | 0.735967 | -7.06143 |
| FCER1A   | NM_002001.2    | 0.12  | 0.139981 | 4.494639 | 0.472221 | 0.637155 | 0.743347 | -7.06668 |
| BID      | NM_001196.2    | 0.038 | 0.056804 | 5.419228 | 0.465418 | 0.642011 | 0.747234 | -7.06986 |
| CD96     | NM_005816.4    | 0.007 | 0.061617 | 6.991743 | 0.459163 | 0.646491 | 0.747959 | -7.07274 |
| HLA-DQB1 | NM_002123.3    | 0.315 | -0.21103 | 5.682745 | -0.45823 | 0.647163 | 0.747959 | -7.07317 |
| PSMB7    | NM_002799.2    | 0     | -0.02535 | 8.642375 | -0.45816 | 0.647213 | 0.747959 | -7.0732  |
| CD22     | NM_001771.2    | 0.068 | -0.12103 | 5.534534 | -0.45153 | 0.651977 | 0.751691 | -7.07621 |
| PLA2G6   | NM_001004426.1 | 0.034 | 0.070664 | 4.049692 | 0.439319 | 0.660786 | 0.759036 | -7.08163 |
| LTA      | NM_000595.2    | 0.017 | -0.08495 | 5.180914 | -0.43841 | 0.661446 | 0.759036 | -7.08203 |
| ILF3     | NM_001137673.1 | 0     | -0.02553 | 8.574618 | -0.4227  | 0.672855 | 0.770325 | -7.08878 |
| OSM      | NM_020530.4    | 0.014 | 0.079023 | 6.986592 | 0.417738 | 0.676474 | 0.772663 | -7.09086 |
| ZAP70    | NM_001079.3    | 0.003 | -0.05358 | 7.294081 | -0.39317 | 0.69451  | 0.791419 | -7.10079 |
| FOS      | NM_005252.2    | 0     | -0.03882 | 12.90851 | -0.37914 | 0.704883 | 0.801375 | -7.10619 |
| IRF5     | NM_002200.3    | 0     | 0.033421 | 6.507566 | 0.364433 | 0.715823 | 0.811929 | -7.11165 |
| CD1C     | NM_001765.2    | 0.113 | 0.094423 | 4.009041 | 0.359838 | 0.719252 | 0.81347  | -7.11331 |
| LCN2     | NM_005564.3    | 0.007 | -0.0795  | 6.196887 | -0.35817 | 0.720502 | 0.81347  | -7.11391 |
| ITGAE    | NM_002208.4    | 0     | -0.03505 | 6.747701 | -0.35362 | 0.723902 | 0.815429 | -7.11552 |
| IL1RAP   | NM_002182.2    | 0     | -0.05549 | 6.01225  | -0.33445 | 0.738306 | 0.828346 | -7.1221  |
| YTHDF2   | NM_001172828.1 | 0.01  | 0.038528 | 5.984099 | 0.332977 | 0.739413 | 0.828346 | -7.12259 |
| CD48     | NM_001778.2    | 0     | -0.02725 | 10.49278 | -0.33162 | 0.74044  | 0.828346 | -7.12304 |
| IL1B     | NM_000576.2    | 0.031 | 0.096229 | 6.876044 | 0.325897 | 0.744757 | 0.831278 | -7.12492 |
| CFD      | NM_001928.2    | 0     | -0.04064 | 6.853647 | -0.31312 | 0.754431 | 0.840085 | -7.12899 |
| CXCR1    | NM_000634.2    | 0.38  | 0.08596  | 2.291848 | 0.310956 | 0.756076 | 0.840085 | -7.12967 |
| ITGA4    | NM_000885.4    | 0     | -0.02192 | 7.624805 | -0.29045 | 0.771695 | 0.855499 | -7.13582 |
| LY86     | NM_004271.3    | 0     | 0.0302   | 7.733498 | 0.285574 | 0.775426 | 0.857695 | -7.13722 |
| NFKBIA   | NM_020529.1    | 0     | -0.03704 | 13.49199 | -0.27474 | 0.783728 | 0.864925 | -7.14025 |

|           |                |       |          |          |          |          |          |          |
|-----------|----------------|-------|----------|----------|----------|----------|----------|----------|
| MAPKAPK2  | NM_004759.3    | 0     | -0.0265  | 8.333636 | -0.25475 | 0.799114 | 0.878633 | -7.14553 |
| ATF2      | NM_001256090.1 | 0     | -0.01359 | 6.355255 | -0.25394 | 0.799736 | 0.878633 | -7.14573 |
| LY96      | NM_015364.2    | 0     | 0.032096 | 7.682891 | 0.241835 | 0.809094 | 0.886926 | -7.14873 |
| HLA-DQA1  | NM_002122.3    | 0.325 | -0.11175 | 6.135714 | -0.22641 | 0.821057 | 0.898032 | -7.15233 |
| ITK       | NM_005546.3    | 0.007 | -0.02951 | 7.219445 | -0.22109 | 0.825194 | 0.899854 | -7.15352 |
| MS4A1     | NM_152866.2    | 0.051 | -0.05722 | 5.816769 | -0.21954 | 0.826396 | 0.899854 | -7.15386 |
| CD164     | NM_006016.4    | 0     | -0.01464 | 8.347077 | -0.21378 | 0.830881 | 0.902731 | -7.1551  |
| IFNGR1    | NM_000416.1    | 0     | -0.02342 | 8.654605 | -0.20884 | 0.834729 | 0.904906 | -7.15614 |
| TNFSF10   | NM_003810.2    | 0     | -0.03057 | 7.480651 | -0.20519 | 0.837584 | 0.905996 | -7.1569  |
| IFITM2    | NM_006435.2    | 0     | 0.023987 | 10.97691 | 0.195966 | 0.844786 | 0.911774 | -7.15875 |
| EGR2      | NM_000399.3    | 0.164 | -0.06166 | 3.880796 | -0.19315 | 0.846987 | 0.91214  | -7.15929 |
| TNFRSF10B | NM_003842.3    | 0.014 | -0.02073 | 5.712225 | -0.18922 | 0.850062 | 0.913444 | -7.16004 |
| MICA      | NM_000247.1    | 0.178 | -0.03878 | 2.747806 | -0.18356 | 0.854501 | 0.916204 | -7.1611  |
| NT5E      | NM_002526.2    | 0.137 | -0.03921 | 2.742171 | -0.17679 | 0.859808 | 0.919882 | -7.16231 |
| SERPING1  | NM_000062.2    | 0.024 | 0.038353 | 5.201847 | 0.162896 | 0.870723 | 0.928173 | -7.16467 |
| TNFRSF1B  | NM_001066.2    | 0     | 0.013391 | 9.797379 | 0.159926 | 0.87306  | 0.928173 | -7.16515 |
| TFEB      | NM_007162.2    | 0.014 | 0.020696 | 5.444916 | 0.159697 | 0.87324  | 0.928173 | -7.16518 |
| CCND3     | NM_001760.2    | 0     | 0.013033 | 8.801348 | 0.154851 | 0.877056 | 0.930211 | -7.16594 |
| IL32      | NM_001012633.1 | 0     | -0.01784 | 10.97232 | -0.14732 | 0.882987 | 0.931925 | -7.16708 |
| RELA      | NM_021975.2    | 0     | 0.01208  | 6.820764 | 0.146826 | 0.88338  | 0.931925 | -7.16715 |
| SH2B2     | NM_020979.3    | 0     | -0.01703 | 6.215647 | -0.14556 | 0.884378 | 0.931925 | -7.16733 |
| TBK1      | NM_013254.2    | 0     | 0.012682 | 6.272289 | 0.140713 | 0.888202 | 0.933947 | -7.16803 |
| PDGFC     | NM_016205.2    | 0.147 | -0.02704 | 3.027464 | -0.12105 | 0.903746 | 0.948256 | -7.1706  |
| ELK1      | NM_005229.3    | 0.031 | -0.01725 | 4.493141 | -0.11209 | 0.910835 | 0.950519 | -7.17164 |
| IL15      | NM_172174.1    | 0.024 | -0.01641 | 4.529072 | -0.11187 | 0.911011 | 0.950519 | -7.17166 |
| IRAK1     | NM_001569.3    | 0     | 0.007457 | 7.226552 | 0.106911 | 0.91494  | 0.950519 | -7.1722  |
| MAPK8     | NM_002750.2    | 0.017 | 0.013963 | 4.508    | 0.106636 | 0.915158 | 0.950519 | -7.17223 |
| HLA-DRB4  | NM_021983.4    | 0.586 | -0.05579 | 3.564225 | -0.10404 | 0.917216 | 0.950519 | -7.17251 |
| NFKB1     | NM_003998.2    | 0.003 | -0.01186 | 5.891648 | -0.10363 | 0.917542 | 0.950519 | -7.17255 |
| ALCAM     | NM_001627.3    | 0.048 | 0.014925 | 3.985995 | 0.08761  | 0.930252 | 0.961653 | -7.17408 |

|                                  |                |       |          |          |          |          |          |          |
|----------------------------------|----------------|-------|----------|----------|----------|----------|----------|----------|
| CASP8                            | NM_001228.4    | 0     | -0.00908 | 8.914187 | -0.08264 | 0.934202 | 0.963703 | -7.1745  |
| MAP3K7                           | NM_145333.1    | 0     | 0.004387 | 6.651272 | 0.074807 | 0.940424 | 0.968084 | -7.17511 |
| TANK                             | NM_004180.2    | 0     | -0.00596 | 8.704286 | -0.07053 | 0.943827 | 0.96955  | -7.17543 |
| MEF2C                            | NM_002397.3    | 0.01  | 0.012584 | 6.102815 | 0.067942 | 0.945882 | 0.969628 | -7.1756  |
| IFI35                            | NM_005533.3    | 0.027 | -0.01384 | 5.329995 | -0.06431 | 0.948771 | 0.970559 | -7.17584 |
| MR1                              | NM_001531.2    | 0.062 | 0.008867 | 3.313179 | 0.05128  | 0.959141 | 0.979123 | -7.1766  |
| ITCH                             | NM_001257138.1 | 0     | 0.002758 | 8.069219 | 0.041977 | 0.966548 | 0.984634 | -7.17703 |
| EGR1                             | NM_001964.2    | 0.031 | 0.010525 | 6.703873 | 0.03938  | 0.968617 | 0.984693 | -7.17713 |
| SPN                              | NM_003123.3    | 0.017 | -0.00554 | 5.328756 | -0.03139 | 0.974985 | 0.989115 | -7.17742 |
| TNF                              | NM_000594.2    | 0     | 0.003392 | 7.861256 | 0.025027 | 0.980052 | 0.992202 | -7.17759 |
| TLR7                             | NM_016562.3    | 0.473 | -0.00364 | 1.375682 | -0.01651 | 0.986838 | 0.994998 | -7.17777 |
| MAP3K5                           | NM_005923.3    | 0     | 0.001323 | 7.51705  | 0.016466 | 0.986875 | 0.994998 | -7.17777 |
| TRAF3                            | NM_145725.1    | 0     | -0.00075 | 7.01356  | -0.01025 | 0.99183  | 0.99794  | -7.17785 |
| IL4R                             | NM_000418.2    | 0     | -0.00035 | 7.572045 | -0.00357 | 0.997152 | 0.999437 | -7.1779  |
| IFIT2                            | NM_001547.4    | 0.003 | -0.00071 | 6.889349 | -0.00326 | 0.997398 | 0.999437 | -7.1779  |
| CCR6                             | NM_031409.2    | 0.301 | 0.000153 | 2.05276  | 0.000706 | 0.999437 | 0.999437 | -7.17791 |
| <b>B. Rd at C3D1 versus C1D1</b> |                |       |          |          |          |          |          |          |
| SLC11A1                          | NM_000578.2    | 0     | 0.649853 | 8.417996 | 5.398942 | 1.48E-07 | 7.26E-05 | 7.102108 |
| PVR                              | NM_006505.3    | 0.182 | 1.110499 | 2.843678 | 4.911774 | 1.57E-06 | 0.000306 | 4.895668 |
| CD163                            | NM_004244.4    | 0.007 | 1.006155 | 7.064932 | 4.84504  | 2.15E-06 | 0.000306 | 4.606771 |
| AKT3                             | NM_181690.1    | 0.003 | -0.58549 | 6.132502 | -4.81202 | 2.50E-06 | 0.000306 | 4.465031 |
| PTPRC                            | NM_080921.3    | 0     | 0.556757 | 9.119697 | 4.676755 | 4.63E-06 | 0.000454 | 3.892933 |
| LTBR                             | NM_002342.1    | 0.007 | 0.54105  | 6.519281 | 4.42419  | 1.41E-05 | 0.001152 | 2.861749 |
| FCGR1A                           | NM_000566.3    | 0.202 | 0.966237 | 2.38127  | 4.318082 | 2.22E-05 | 0.00144  | 2.443168 |
| CLEC4C                           | NM_203503.1    | 0.455 | -1.03891 | 1.61876  | -4.29878 | 2.41E-05 | 0.00144  | 2.367971 |
| C1QA                             | NM_015991.2    | 0.127 | 1.089717 | 4.247896 | 4.276552 | 2.65E-05 | 0.00144  | 2.28173  |
| S100A12                          | NM_005621.1    | 0     | 0.592689 | 10.46119 | 4.074347 | 6.09E-05 | 0.002983 | 1.515151 |
| TLR5                             | NM_003268.3    | 0.202 | 1.044633 | 3.00475  | 3.882995 | 0.00013  | 0.005796 | 0.819838 |
| CD19                             | NM_001770.4    | 0.055 | -0.96608 | 4.816248 | -3.83208 | 0.000158 | 0.006471 | 0.639815 |
| PSMB10                           | NM_002801.2    | 0     | 0.260148 | 8.926977 | 3.760922 | 0.000208 | 0.006944 | 0.39181  |

|           |                |       |          |          |          |          |          |          |
|-----------|----------------|-------|----------|----------|----------|----------|----------|----------|
| C1QB      | NM_000491.3    | 0.195 | 1.135341 | 3.38991  | 3.759569 | 0.000209 | 0.006944 | 0.387136 |
| FCER1G    | NM_004106.1    | 0     | 0.372388 | 10.93316 | 3.755241 | 0.000213 | 0.006944 | 0.372192 |
| CD33      | NM_001177608.1 | 0.024 | 0.637066 | 5.324418 | 3.735947 | 0.000229 | 0.007003 | 0.305749 |
| TNFRSF13C | NM_052945.3    | 0.045 | -0.95699 | 6.038428 | -3.68252 | 0.000279 | 0.008055 | 0.123366 |
| REPS1     | NM_001128617.2 | 0     | -0.3198  | 7.134522 | -3.65881 | 0.000305 | 0.00831  | 0.043177 |
| CYBB      | NM_000397.3    | 0     | 0.433378 | 9.699284 | 3.605692 | 0.000371 | 0.009578 | -0.13474 |
| CD1D      | NM_001766.3    | 0     | 0.422858 | 6.7726   | 3.587927 | 0.000396 | 0.009711 | -0.19372 |
| BTLA      | NM_181780.2    | 0.034 | -0.74037 | 4.895995 | -3.52687 | 0.000495 | 0.01121  | -0.39444 |
| MARCO     | NM_006770.3    | 0.031 | 0.76794  | 5.582365 | 3.522134 | 0.000503 | 0.01121  | -0.40987 |
| PAX5      | NM_016734.1    | 0.178 | -1.02839 | 3.896755 | -3.50826 | 0.000529 | 0.011271 | -0.45499 |
| NLRP3     | NM_001079821.2 | 0     | 0.462995 | 7.913347 | 3.323034 | 0.001015 | 0.02072  | -1.04173 |
| CD79A     | NM_001783.3    | 0.003 | -0.69935 | 7.378975 | -3.27274 | 0.001205 | 0.023473 | -1.19601 |
| YTHDF2    | NM_001172828.1 | 0.01  | -0.39429 | 5.984099 | -3.26309 | 0.001246 | 0.023473 | -1.22537 |
| IL17RA    | NM_014339.6    | 0.003 | 0.392085 | 7.084215 | 3.194116 | 0.001571 | 0.028507 | -1.43286 |
| TLR4      | NM_138554.2    | 0.003 | 0.457586 | 6.63778  | 3.165404 | 0.001728 | 0.030241 | -1.51803 |
| MAP2K1    | NM_002755.2    | 0     | 0.278369 | 7.536886 | 3.072457 | 0.002342 | 0.03958  | -1.78884 |
| CD79B     | NM_021602.2    | 0     | -0.52153 | 7.068639 | -3.05715 | 0.002461 | 0.0402   | -1.83273 |
| TNFRSF9   | NM_001561.4    | 0.329 | 0.675476 | 1.935197 | 3.012679 | 0.002838 | 0.040448 | -1.95905 |
| CD22      | NM_001771.2    | 0.068 | -0.84185 | 5.534534 | -3.00746 | 0.002886 | 0.040448 | -1.97376 |
| MEFV      | NM_000243.2    | 0.003 | 0.42648  | 7.319955 | 3.007048 | 0.002889 | 0.040448 | -1.97492 |
| CD14      | NM_000591.2    | 0     | 0.455382 | 9.392181 | 3.005605 | 0.002903 | 0.040448 | -1.97898 |
| HCK       | NM_002110.2    | 0     | 0.365201 | 9.069937 | 3.002509 | 0.002931 | 0.040448 | -1.98769 |
| ST6GAL1   | NM_003032.2    | 0.003 | -0.40176 | 7.03997  | -2.98377 | 0.003111 | 0.040448 | -2.04023 |
| CTSS      | NM_004079.3    | 0     | 0.289475 | 12.66577 | 2.979909 | 0.003149 | 0.040448 | -2.05103 |
| CFP       | NM_002621.2    | 0     | 0.286048 | 8.896465 | 2.979278 | 0.003155 | 0.040448 | -2.05279 |
| STAT1     | NM_007315.2    | 0     | 0.350761 | 8.891621 | 2.972893 | 0.003219 | 0.040448 | -2.0706  |
| ENTPD1    | NM_001098175.1 | 0.092 | 0.630554 | 3.750198 | 2.914531 | 0.003864 | 0.043183 | -2.23173 |
| LRP1      | NM_002332.2    | 0     | 0.311489 | 7.60475  | 2.908183 | 0.003941 | 0.043183 | -2.24908 |
| ITGAM     | NM_000632.3    | 0     | 0.289988 | 8.143104 | 2.90555  | 0.003973 | 0.043183 | -2.25626 |
| IL18RAP   | NM_003853.2    | 0.065 | 0.844331 | 4.95418  | 2.902213 | 0.004014 | 0.043183 | -2.26536 |

|         |             |       |          |          |          |          |          |          |
|---------|-------------|-------|----------|----------|----------|----------|----------|----------|
| ITGB2   | NM_000211.2 | 0     | 0.226878 | 10.81662 | 2.889894 | 0.00417  | 0.043183 | -2.29886 |
| IL13RA1 | NM_001560.2 | 0     | 0.333556 | 7.233484 | 2.888847 | 0.004184 | 0.043183 | -2.3017  |
| TLR8    | NM_016610.2 | 0.014 | 0.429362 | 5.396971 | 2.887871 | 0.004196 | 0.043183 | -2.30435 |
| IRF8    | NM_002163.2 | 0     | 0.270587 | 7.381763 | 2.884113 | 0.004245 | 0.043183 | -2.31453 |
| IL6R    | NM_000565.2 | 0     | 0.273818 | 6.492918 | 2.875677 | 0.004357 | 0.043183 | -2.33735 |
| FPR2    | NM_001462.3 | 0.041 | 0.665984 | 5.147605 | 2.875106 | 0.004364 | 0.043183 | -2.33889 |
| RPS6    | NM_001010.2 | 0     | -0.25575 | 12.82758 | -2.87196 | 0.004406 | 0.043183 | -2.34737 |
| NOD2    | NM_022162.1 | 0     | 0.317584 | 6.60489  | 2.845446 | 0.004779 | 0.045911 | -2.4186  |
| TLR2    | NM_003264.3 | 0     | 0.382829 | 7.639966 | 2.821326 | 0.005142 | 0.04788  | -2.48285 |
| IL18    | NM_001562.2 | 0.024 | 0.457216 | 5.163597 | 2.812994 | 0.005273 | 0.04788  | -2.50493 |
| PYCARD  | NM_013258.3 | 0     | 0.284235 | 7.013016 | 2.807569 | 0.00536  | 0.04788  | -2.51927 |
| TOLLIP  | NM_019009.2 | 0.01  | 0.323312 | 5.198327 | 2.802061 | 0.005449 | 0.04788  | -2.5338  |
| NFATC1  | NM_172389.1 | 0.007 | -0.31559 | 5.23277  | -2.80069 | 0.005472 | 0.04788  | -2.53742 |
| MS4A1   | NM_152866.2 | 0.051 | -0.75848 | 5.816769 | -2.78658 | 0.005709 | 0.049076 | -2.57452 |
| CARD9   | NM_052813.4 | 0.089 | 0.622355 | 4.2204   | 2.765526 | 0.006079 | 0.05136  | -2.62952 |
| RIPK2   | NM_003821.5 | 0     | 0.347649 | 8.656458 | 2.759609 | 0.006187 | 0.051387 | -2.64491 |
| IL10    | NM_000572.2 | 0.253 | 0.809981 | 2.957527 | 2.748686 | 0.006391 | 0.052197 | -2.67324 |
| IL18R1  | NM_003855.2 | 0.106 | 0.727393 | 3.790822 | 2.730764 | 0.006739 | 0.054136 | -2.7195  |
| ANXA1   | NM_000700.1 | 0     | 0.266762 | 11.06019 | 2.723883 | 0.006877 | 0.054354 | -2.73718 |
| ITGA5   | NM_002205.2 | 0     | 0.21663  | 7.295539 | 2.700133 | 0.007374 | 0.057352 | -2.79789 |
| HAVCR2  | NM_032782.3 | 0.014 | 0.399003 | 5.285496 | 2.660709 | 0.00827  | 0.062624 | -2.89755 |
| CASP1   | NM_001223.3 | 0     | 0.281518 | 8.02859  | 2.65724  | 0.008353 | 0.062624 | -2.90626 |
| FCER2   | NM_002002.4 | 0.082 | -0.73308 | 4.805759 | -2.65235 | 0.008472 | 0.062624 | -2.91852 |
| BLK     | NM_001715.2 | 0.12  | -0.66107 | 3.655608 | -2.64863 | 0.008563 | 0.062624 | -2.92781 |
| HLA-DMB | NM_002118.3 | 0     | 0.275923 | 8.280356 | 2.635523 | 0.008892 | 0.064074 | -2.9605  |
| AMICA1  | NM_153206.2 | 0     | 0.369879 | 8.896182 | 2.596844 | 0.00993  | 0.070516 | -3.05606 |
| CD68    | NM_001251.2 | 0     | 0.241568 | 9.788476 | 2.585415 | 0.010257 | 0.071796 | -3.08404 |
| JAK2    | NM_004972.2 | 0     | 0.239842 | 7.932236 | 2.578903 | 0.010447 | 0.072099 | -3.09993 |
| MIF     | NM_002415.1 | 0     | -0.20136 | 8.121836 | -2.56869 | 0.010752 | 0.073175 | -3.12478 |
| KLRC2   | NM_002260.3 | 0.134 | 0.632118 | 3.811944 | 2.56281  | 0.010931 | 0.073375 | -3.13903 |

|          |                |       |          |          |          |          |          |          |
|----------|----------------|-------|----------|----------|----------|----------|----------|----------|
| HLA-DOB  | NM_002120.3    | 0.01  | -0.48195 | 5.225432 | -2.54299 | 0.011555 | 0.076515 | -3.18687 |
| HLA-DMA  | NM_006120.3    | 0     | 0.218716 | 8.650773 | 2.500209 | 0.013012 | 0.085011 | -3.28894 |
| CD36     | NM_001001548.2 | 0     | 0.348625 | 9.040517 | 2.493555 | 0.013253 | 0.085444 | -3.30466 |
| LILRA1   | NM_006863.1    | 0.038 | 0.518531 | 5.249274 | 2.474952 | 0.013946 | 0.087884 | -3.34842 |
| IL10RA   | NM_001558.2    | 0     | 0.170624 | 9.67183  | 2.473823 | 0.01399  | 0.087884 | -3.35107 |
| CCRL2    | NM_003965.4    | 0.072 | 0.493346 | 3.840413 | 2.464305 | 0.014358 | 0.089056 | -3.37332 |
| MERTK    | NM_006343.2    | 0.171 | 0.571311 | 2.826829 | 2.454263 | 0.014756 | 0.089781 | -3.39671 |
| TNFSF13  | NM_003808.3    | 0     | 0.328814 | 6.691757 | 2.452137 | 0.014841 | 0.089781 | -3.40165 |
| APP      | NM_000484.3    | 0     | 0.216949 | 7.901192 | 2.441838 | 0.015262 | 0.090407 | -3.42553 |
| BST1     | NM_004334.2    | 0     | 0.279936 | 8.429325 | 2.431263 | 0.015704 | 0.090407 | -3.44995 |
| LY9      | NM_001033667.1 | 0     | -0.25652 | 6.883577 | -2.43112 | 0.01571  | 0.090407 | -3.45027 |
| LILRB2   | NM_005874.1    | 0     | 0.244214 | 7.646844 | 2.427443 | 0.015867 | 0.090407 | -3.45874 |
| TNFRSF1A | NM_001065.2    | 0     | 0.236777 | 7.604868 | 2.427435 | 0.015867 | 0.090407 | -3.45876 |
| MX1      | NM_002462.2    | 0     | -0.38316 | 7.738464 | -2.42307 | 0.016055 | 0.090426 | -3.4688  |
| MAPK14   | NM_001315.1    | 0     | 0.323065 | 8.18495  | 2.411446 | 0.016564 | 0.092234 | -3.49543 |
| THBS1    | NM_003246.2    | 0     | 0.662285 | 10.2535  | 2.387285 | 0.017669 | 0.09728  | -3.5504  |
| ATG5     | NM_004849.2    | 0     | -0.1742  | 6.209561 | -2.36956 | 0.01852  | 0.100085 | -3.59039 |
| BCL6     | NM_001706.2    | 0     | 0.320457 | 9.486685 | 2.368199 | 0.018587 | 0.100085 | -3.59345 |
| FYN      | NM_002037.3    | 0     | 0.19631  | 8.537363 | 2.357312 | 0.019129 | 0.101885 | -3.61786 |
| C2       | NM_000063.3    | 0.243 | 0.607295 | 2.578399 | 2.351354 | 0.019432 | 0.102384 | -3.63117 |
| CCR2     | NM_001123041.2 | 0.175 | 0.70728  | 3.44741  | 2.31932  | 0.021132 | 0.110157 | -3.70219 |
| S100A8   | NM_002964.3    | 0     | 0.407041 | 12.77144 | 2.304992 | 0.021934 | 0.112043 | -3.73366 |
| POU2AF1  | NM_006235.2    | 0.455 | -0.64524 | 1.816663 | -2.30469 | 0.021951 | 0.112043 | -3.73432 |
| CD47     | NM_001777.3    | 0     | -0.11342 | 8.84671  | -2.2628  | 0.024451 | 0.123518 | -3.82523 |
| IFITM1   | NM_003641.3    | 0     | -0.24982 | 10.38768 | -2.23693 | 0.026116 | 0.130581 | -3.88055 |
| CD200    | NM_005944.5    | 0.226 | -0.55472 | 2.696199 | -2.22323 | 0.027037 | 0.133213 | -3.90961 |
| TLR10    | NM_030956.2    | 0.096 | -0.49708 | 3.325336 | -2.22105 | 0.027186 | 0.133213 | -3.91422 |
| CD24     | NM_013230.2    | 0.007 | -0.4546  | 5.745172 | -2.21158 | 0.027843 | 0.133577 | -3.9342  |
| S100B    | NM_006272.1    | 0.5   | 0.60387  | 1.716099 | 2.20998  | 0.027955 | 0.133577 | -3.93755 |
| CEBPB    | NM_005194.2    | 0     | 0.25002  | 9.52179  | 2.208221 | 0.028078 | 0.133577 | -3.94125 |



|                           |                |       |          |          |          |          |          |          |
|---------------------------|----------------|-------|----------|----------|----------|----------|----------|----------|
| ISG15                     | NM_005101.3    | 0     | -0.38291 | 7.013594 | -2.1724  | 0.030705 | 0.144668 | -4.01592 |
| ECSIT                     | NM_001142464.2 | 0.003 | 0.255897 | 5.140958 | 2.163798 | 0.031366 | 0.146377 | -4.03368 |
| ARG1                      | NM_000045.2    | 0.408 | 0.709211 | 2.243983 | 2.153398 | 0.032183 | 0.148768 | -4.05505 |
| IKBKB                     | NM_001556.1    | 0.024 | 0.369268 | 4.661722 | 2.129514 | 0.034126 | 0.155876 | -4.10377 |
| NLRC5                     | NM_032206.4    | 0.003 | 0.251502 | 7.113546 | 2.126765 | 0.034356 | 0.155876 | -4.10934 |
| LCP1                      | NM_002298.4    | 0     | 0.170876 | 11.29735 | 2.114978 | 0.035358 | 0.15849  | -4.13316 |
| CD4                       | NM_000616.4    | 0     | 0.228019 | 7.792406 | 2.11241  | 0.035579 | 0.15849  | -4.13834 |
| IGF2R                     | NM_000876.1    | 0.003 | 0.258861 | 6.933908 | 2.105662 | 0.036167 | 0.158934 | -4.1519  |
| EWSR1                     | NM_013986.3    | 0     | 0.095431 | 8.235811 | 2.103836 | 0.036328 | 0.158934 | -4.15556 |
| IFIT1                     | NM_001548.3    | 0.079 | -0.60582 | 4.665226 | -2.09225 | 0.03736  | 0.162005 | -4.17873 |
| JAK3                      | NM_000215.2    | 0     | 0.187426 | 7.79399  | 2.060498 | 0.040319 | 0.170947 | -4.24159 |
| TXK                       | NM_003328.1    | 0.202 | -0.46705 | 2.831012 | -2.06026 | 0.040342 | 0.170947 | -4.24206 |
| SERPING1                  | NM_000062.2    | 0.024 | 0.506245 | 5.201847 | 2.058943 | 0.040469 | 0.170947 | -4.24465 |
| TYK2                      | NM_003331.3    | 0     | 0.166719 | 6.65378  | 2.053387 | 0.041009 | 0.171746 | -4.25554 |
| IL11RA                    | NM_147162.1    | 0.161 | 0.474122 | 3.040718 | 2.040632 | 0.042271 | 0.174776 | -4.28045 |
| PLAUR                     | NM_001005376.1 | 0     | 0.2726   | 9.382228 | 2.038888 | 0.042446 | 0.174776 | -4.28384 |
| MAPK1                     | NM_138957.2    | 0     | 0.155235 | 8.063744 | 2.024576 | 0.043906 | 0.179282 | -4.31159 |
| KIR_Activating_Subgroup_2 | NM_014512.1    | 0.349 | 0.542072 | 2.233523 | 2.006404 | 0.045821 | 0.185556 | -4.34654 |
| ITGAX                     | NM_000887.3    | 0     | 0.189696 | 9.114923 | 1.99116  | 0.047482 | 0.190706 | -4.37563 |
| IFNGR1                    | NM_000416.1    | 0     | 0.231399 | 8.654605 | 1.976196 | 0.049161 | 0.194662 | -4.40397 |
| IL3RA                     | NM_002183.2    | 0.161 | 0.460785 | 2.90557  | 1.969183 | 0.049966 | 0.194662 | -4.41718 |
| LTA                       | NM_000595.2    | 0.017 | -0.39844 | 5.180914 | -1.96893 | 0.049995 | 0.194662 | -4.41766 |
| PNMA1                     | NM_006029.4    | 0     | -0.21109 | 5.465363 | -1.9684  | 0.050056 | 0.194662 | -4.41866 |
| STAT2                     | NM_005419.2    | 0     | 0.25222  | 7.762665 | 1.964631 | 0.050493 | 0.194817 | -4.42574 |
| IRF5                      | NM_002200.3    | 0     | 0.187137 | 6.507566 | 1.954044 | 0.05174  | 0.196714 | -4.44555 |
| IL1R2                     | NM_173343.1    | 0.027 | 0.678679 | 5.976301 | 1.948863 | 0.052359 | 0.196714 | -4.45521 |
| CTSH                      | NM_004390.3    | 0     | 0.197465 | 8.795855 | 1.947248 | 0.052553 | 0.196714 | -4.45821 |
| GZMK                      | NM_002104.2    | 0.01  | 0.388655 | 6.858668 | 1.946933 | 0.052591 | 0.196714 | -4.4588  |
| DUSP6                     | NM_001946.2    | 0     | 0.287268 | 8.345518 | 1.942615 | 0.053114 | 0.197164 | -4.46682 |
| ITGB1                     | NM_033666.2    | 0     | 0.151899 | 9.274698 | 1.9335   | 0.054231 | 0.199799 | -4.4837  |

|        |                |       |          |          |          |          |          |          |
|--------|----------------|-------|----------|----------|----------|----------|----------|----------|
| CCR4   | NM_005508.4    | 0.062 | 0.40484  | 4.225344 | 1.92629  | 0.055129 | 0.201592 | -4.497   |
| IRF1   | NM_002198.1    | 0     | 0.268003 | 10.08568 | 1.920608 | 0.055846 | 0.201963 | -4.50744 |
| CD40   | NM_001250.4    | 0.021 | 0.348471 | 5.137436 | 1.918643 | 0.056095 | 0.201963 | -4.51105 |
| STAT6  | NM_003153.3    | 0     | 0.191287 | 9.220851 | 1.913643 | 0.056735 | 0.201963 | -4.52021 |
| SYK    | NM_003177.3    | 0     | 0.203681 | 7.845749 | 1.911712 | 0.056983 | 0.201963 | -4.52374 |
| CR1    | NM_000651.4    | 0     | 0.31129  | 8.079674 | 1.909324 | 0.057292 | 0.201963 | -4.5281  |
| FCGR2A | NM_021642.3    | 0     | 0.251237 | 9.886013 | 1.870898 | 0.062452 | 0.217856 | -4.59754 |
| CXCL16 | NM_001100812.1 | 0.003 | 0.304399 | 7.241422 | 1.869201 | 0.062689 | 0.217856 | -4.60058 |
| CD63   | NM_001780.4    | 0     | 0.201039 | 9.740343 | 1.861781 | 0.063732 | 0.219921 | -4.61382 |
| CREB5  | NM_182898.2    | 0.007 | 0.342881 | 6.394364 | 1.827054 | 0.068807 | 0.235774 | -4.6751  |
| CD27   | NM_001242.4    | 0.031 | 0.366202 | 5.303214 | 1.82131  | 0.069678 | 0.235942 | -4.68513 |
| IL15   | NM_172174.1    | 0.024 | 0.278795 | 4.529072 | 1.820384 | 0.06982  | 0.235942 | -4.68675 |
| MFGE8  | NM_001114614.1 | 0.055 | 0.367137 | 3.704272 | 1.812776 | 0.070989 | 0.237231 | -4.69998 |
| CLEC4A | NM_194448.2    | 0     | 0.180087 | 7.873964 | 1.808366 | 0.071674 | 0.237231 | -4.70762 |
| STAT3  | NM_139276.2    | 0     | 0.138286 | 8.852237 | 1.805768 | 0.07208  | 0.237231 | -4.71211 |
| THBD   | NM_000361.2    | 0.003 | 0.396772 | 8.640481 | 1.805403 | 0.072138 | 0.237231 | -4.71274 |
| BMI1   | NM_005180.5    | 0     | -0.24835 | 7.752925 | -1.79966 | 0.073043 | 0.237993 | -4.72266 |
| CAMP   | NM_004345.3    | 0.253 | -0.54601 | 2.845462 | -1.79778 | 0.073341 | 0.237993 | -4.72589 |
| LGALS3 | NM_001177388.1 | 0     | 0.231598 | 9.566068 | 1.790041 | 0.07458  | 0.240422 | -4.73918 |
| OAS3   | NM_006187.2    | 0.024 | -0.4302  | 5.979037 | -1.78585 | 0.075258 | 0.241022 | -4.74636 |
| CYFIP2 | NM_001037332.2 | 0     | -0.1507  | 7.800324 | -1.77532 | 0.076984 | 0.244949 | -4.76432 |
| CD53   | NM_001040033.1 | 0     | 0.130297 | 10.1139  | 1.75428  | 0.080529 | 0.254576 | -4.79988 |
| PSEN1  | NM_000021.2    | 0     | 0.119523 | 6.638653 | 1.744023 | 0.082305 | 0.258523 | -4.81707 |
| IKBKG  | NM_003639.2    | 0.003 | 0.171899 | 6.347981 | 1.737537 | 0.083445 | 0.260434 | -4.82789 |
| SBNO2  | NM_014963.2    | 0.003 | 0.242296 | 6.477355 | 1.725033 | 0.085678 | 0.265055 | -4.84863 |
| CCL20  | NM_004591.1    | 0.411 | 0.503224 | 1.999293 | 1.722927 | 0.086059 | 0.265055 | -4.85211 |
| IKBKE  | NM_014002.2    | 0.027 | 0.348245 | 5.211535 | 1.720232 | 0.086548 | 0.265055 | -4.85656 |
| FEZ1   | NM_005103.4    | 0.414 | -0.39471 | 1.635389 | -1.71457 | 0.087585 | 0.265057 | -4.86589 |
| MYD88  | NM_002468.3    | 0     | 0.157277 | 8.563028 | 1.714314 | 0.087631 | 0.265057 | -4.8663  |
| IL15RA | NM_002189.2    | 0     | 0.171828 | 5.735257 | 1.705019 | 0.089354 | 0.26806  | -4.88153 |

|          |                |       |          |          |          |          |          |          |
|----------|----------------|-------|----------|----------|----------|----------|----------|----------|
| HLA-DRB3 | NM_022555.3    | 0     | 0.162623 | 11.31087 | 1.701806 | 0.089955 | 0.26806  | -4.88678 |
| ATG7     | NM_001136031.2 | 0.014 | 0.312047 | 5.433937 | 1.697908 | 0.09069  | 0.26806  | -4.89313 |
| ABL1     | NM_005157.3    | 0.014 | 0.207507 | 4.733803 | 1.697261 | 0.090812 | 0.26806  | -4.89418 |
| BLNK     | NM_013314.2    | 0.432 | -0.42253 | 1.715381 | -1.68986 | 0.092222 | 0.270592 | -4.90621 |
| LAIR2    | NM_002288.3    | 0.014 | 0.283682 | 4.845662 | 1.662802 | 0.097525 | 0.284448 | -4.9497  |
| CTSG     | NM_001911.2    | 0.462 | 0.466499 | 1.792806 | 1.652566 | 0.099594 | 0.287402 | -4.96597 |
| SMAD3    | NM_005902.3    | 0     | -0.19844 | 6.376146 | -1.65199 | 0.099711 | 0.287402 | -4.96688 |
| SIGLEC1  | NM_023068.3    | 0.182 | -0.57625 | 3.955035 | -1.63612 | 0.102992 | 0.293524 | -4.99192 |
| FCGR2B   | NM_001002273.1 | 0.048 | -0.36223 | 5.088996 | -1.63592 | 0.103033 | 0.293524 | -4.99222 |
| TRAF6    | NM_145803.1    | 0     | -0.14214 | 6.432924 | -1.6277  | 0.104767 | 0.294891 | -5.0051  |
| IL6ST    | NM_002184.2    | 0     | 0.13593  | 8.300979 | 1.626997 | 0.104917 | 0.294891 | -5.0062  |
| ZAP70    | NM_001079.3    | 0.003 | 0.231296 | 7.294081 | 1.625111 | 0.105318 | 0.294891 | -5.00914 |
| TAL1     | NM_003189.2    | 0.058 | 0.391792 | 4.306962 | 1.619658 | 0.106486 | 0.295847 | -5.01763 |
| PDGFRB   | NM_002609.3    | 0.349 | -0.36159 | 1.901005 | -1.6156  | 0.107362 | 0.295847 | -5.02393 |
| SPN      | NM_003123.3    | 0.017 | 0.297969 | 5.328756 | 1.615094 | 0.107471 | 0.295847 | -5.02472 |
| PSMB9    | NM_002800.4    | 0     | 0.191226 | 8.658391 | 1.609071 | 0.108782 | 0.297783 | -5.03403 |
| GZMA     | NM_006144.2    | 0.01  | 0.33559  | 8.236576 | 1.602637 | 0.110197 | 0.29998  | -5.04395 |
| FLT3LG   | NM_001459.3    | 0     | -0.15312 | 7.150165 | -1.58771 | 0.113534 | 0.307357 | -5.0668  |
| TRAF2    | NM_021138.3    | 0.048 | -0.28625 | 3.923246 | -1.58413 | 0.114347 | 0.307857 | -5.07226 |
| IFI16    | NM_005531.1    | 0     | 0.146863 | 6.908296 | 1.576568 | 0.116078 | 0.310811 | -5.08373 |
| CD59     | NM_000611.4    | 0     | -0.24161 | 6.047519 | -1.56923 | 0.117779 | 0.313093 | -5.09482 |
| NFATC3   | NM_004555.2    | 0     | -0.1109  | 6.85298  | -1.56739 | 0.118209 | 0.313093 | -5.09759 |
| IRF4     | NM_002460.1    | 0.003 | -0.24488 | 6.314729 | -1.55799 | 0.120419 | 0.317233 | -5.11169 |
| CXCR5    | NM_001716.3    | 0.171 | -0.38    | 3.232261 | -1.54869 | 0.122641 | 0.321303 | -5.12557 |
| CXCL2    | NM_002089.3    | 0.058 | 0.503904 | 6.138127 | 1.546054 | 0.123276 | 0.321303 | -5.12949 |
| LILRA5   | NM_181879.2    | 0     | 0.18787  | 9.279045 | 1.532967 | 0.126467 | 0.327879 | -5.14884 |
| CXCL1    | NM_001511.1    | 0.144 | 0.479658 | 4.529862 | 1.528123 | 0.127665 | 0.329242 | -5.15596 |
| BCL2     | NM_000657.2    | 0     | -0.16938 | 5.932649 | -1.51955 | 0.129807 | 0.333014 | -5.16852 |
| ITGA2B   | NM_000419.3    | 0     | 0.277841 | 7.925738 | 1.508151 | 0.132698 | 0.336045 | -5.18509 |
| INPP5D   | NM_005541.3    | 0     | 0.098115 | 7.592274 | 1.507026 | 0.132986 | 0.336045 | -5.18672 |

|                           |                |       |          |          |          |          |          |          |
|---------------------------|----------------|-------|----------|----------|----------|----------|----------|----------|
| KIR_Inhibiting_Subgroup_2 | NM_014511.3    | 0.466 | 0.366432 | 1.691103 | 1.504105 | 0.133736 | 0.336045 | -5.19095 |
| RUNX1                     | NM_001754.4    | 0     | 0.135726 | 6.612867 | 1.502697 | 0.134099 | 0.336045 | -5.19298 |
| TICAM2                    | NM_021649.4    | 0.158 | 0.354664 | 3.007295 | 1.501459 | 0.134418 | 0.336045 | -5.19477 |
| CSF2RB                    | NM_000395.2    | 0     | 0.227045 | 8.605077 | 1.496065 | 0.135817 | 0.337819 | -5.20254 |
| CD44                      | NM_001001392.1 | 0     | 0.115002 | 11.27305 | 1.489173 | 0.137622 | 0.340579 | -5.21243 |
| MAPK3                     | NM_001040056.1 | 0     | 0.135772 | 6.641203 | 1.484638 | 0.138819 | 0.341815 | -5.21891 |
| STAT5B                    | NM_012448.3    | 0     | 0.1449   | 6.965891 | 1.481073 | 0.139766 | 0.342426 | -5.22399 |
| DOCK9                     | NM_001130048.1 | 0.024 | -0.24066 | 4.756119 | -1.47651 | 0.140985 | 0.343694 | -5.23048 |
| TFEB                      | NM_007162.2    | 0.014 | 0.198568 | 5.444916 | 1.467191 | 0.1435   | 0.348095 | -5.24366 |
| C3AR1                     | NM_004054.2    | 0.147 | 0.404109 | 3.763189 | 1.457435 | 0.146171 | 0.352827 | -5.25738 |
| TAP2                      | NM_000544.3    | 0     | 0.126885 | 7.793236 | 1.451425 | 0.147835 | 0.355094 | -5.26578 |
| TNFSF13B                  | NM_006573.4    | 0.003 | 0.228729 | 6.505515 | 1.44661  | 0.149179 | 0.356573 | -5.27249 |
| ADORA2A                   | NM_000675.3    | 0.003 | -0.28249 | 6.562508 | -1.44157 | 0.150595 | 0.358212 | -5.27949 |
| CHUK                      | NM_001278.3    | 0     | 0.142044 | 6.720205 | 1.433005 | 0.153026 | 0.362235 | -5.29133 |
| LILRB3                    | NM_006864.2    | 0     | 0.227995 | 7.73877  | 1.421607 | 0.156307 | 0.366304 | -5.30698 |
| CD244                     | NM_016382.2    | 0.017 | 0.227002 | 6.020149 | 1.421503 | 0.156337 | 0.366304 | -5.30712 |
| TLR6                      | NM_006068.2    | 0.024 | 0.231144 | 4.722826 | 1.419266 | 0.156987 | 0.366304 | -5.31018 |
| KLRC1                     | NM_002259.3    | 0.079 | 0.308205 | 4.143517 | 1.407404 | 0.16047  | 0.372656 | -5.3263  |
| TNFRSF14                  | NM_003820.2    | 0     | 0.074707 | 7.564073 | 1.400958 | 0.162387 | 0.375329 | -5.33501 |
| TICAM1                    | NM_014261.1    | 0.003 | -0.15947 | 6.452073 | -1.38576 | 0.166976 | 0.38251  | -5.35539 |
| GZMM                      | NM_005317.2    | 0.01  | -0.19299 | 5.841592 | -1.38344 | 0.167686 | 0.38251  | -5.35848 |
| CSF1R                     | NM_005211.2    | 0.164 | 0.367074 | 3.669342 | 1.381801 | 0.168187 | 0.38251  | -5.36066 |
| TNFRSF1B                  | NM_001066.2    | 0     | 0.12029  | 9.797379 | 1.37563  | 0.170089 | 0.38251  | -5.36885 |
| VEGFA                     | NM_001025366.1 | 0     | 0.170801 | 7.925177 | 1.37115  | 0.171479 | 0.38251  | -5.37477 |
| ATF2                      | NM_001256090.1 | 0     | -0.07659 | 6.355255 | -1.37055 | 0.171666 | 0.38251  | -5.37556 |
| MAP3K1                    | NM_005921.1    | 0     | -0.08756 | 8.030733 | -1.37039 | 0.171715 | 0.38251  | -5.37577 |
| LILRB1                    | NM_001081637.1 | 0.007 | 0.23053  | 6.524287 | 1.370314 | 0.171739 | 0.38251  | -5.37587 |
| CCND3                     | NM_001760.2    | 0     | 0.120015 | 8.801348 | 1.365466 | 0.173256 | 0.384141 | -5.38225 |
| TFRC                      | NM_003234.1    | 0     | 0.163735 | 7.850671 | 1.359198 | 0.17523  | 0.386769 | -5.39047 |
| TLR1                      | NM_003263.3    | 0     | 0.143132 | 7.545529 | 1.356638 | 0.176042 | 0.386818 | -5.39382 |

|           |                |       |          |          |          |          |          |          |
|-----------|----------------|-------|----------|----------|----------|----------|----------|----------|
| CD180     | NM_005582.2    | 0.164 | -0.35978 | 3.296288 | -1.33782 | 0.182094 | 0.397744 | -5.41823 |
| BCL10     | NM_003921.2    | 0     | -0.09699 | 8.121733 | -1.33615 | 0.182637 | 0.397744 | -5.42037 |
| SIGIRR    | NM_021805.2    | 0.007 | 0.162053 | 6.441101 | 1.330232 | 0.184577 | 0.400188 | -5.42797 |
| ETS1      | NM_005238.3    | 0     | -0.14402 | 9.109918 | -1.30143 | 0.194231 | 0.419266 | -5.46446 |
| CD84      | NM_001184879.1 | 0     | 0.103051 | 6.841624 | 1.296144 | 0.196045 | 0.421324 | -5.47107 |
| RELA      | NM_021975.2    | 0     | -0.11051 | 6.820764 | -1.2863  | 0.199453 | 0.424922 | -5.48332 |
| RUNX3     | NM_004350.1    | 0     | -0.14655 | 8.954162 | -1.28533 | 0.199792 | 0.424922 | -5.48452 |
| ITGAL     | NM_002209.2    | 0     | 0.110709 | 8.40379  | 1.282449 | 0.200797 | 0.424922 | -5.48808 |
| F13A1     | NM_000129.3    | 0     | 0.208432 | 9.569633 | 1.281333 | 0.201188 | 0.424922 | -5.48946 |
| MAPK8     | NM_002750.2    | 0.017 | -0.17437 | 4.508    | -1.27521 | 0.203341 | 0.427627 | -5.49699 |
| SELPLG    | NM_001206609.1 | 0     | 0.180803 | 7.156874 | 1.25212  | 0.211621 | 0.443139 | -5.52511 |
| BTK       | NM_000061.1    | 0     | 0.109534 | 6.738055 | 1.24502  | 0.214216 | 0.446662 | -5.53365 |
| CDKN1A    | NM_000389.2    | 0     | 0.136136 | 9.091459 | 1.241019 | 0.215688 | 0.446902 | -5.53845 |
| ICAM4     | NM_001039132.1 | 0.068 | 0.262216 | 3.664074 | 1.239754 | 0.216154 | 0.446902 | -5.53996 |
| IL16      | NM_004513.4    | 0     | -0.07198 | 7.722864 | -1.22411 | 0.221988 | 0.457034 | -5.55853 |
| ITGA6     | NM_000210.1    | 0.062 | -0.26395 | 4.19563  | -1.21486 | 0.225491 | 0.462304 | -5.5694  |
| CX3CR1    | NM_001337.3    | 0.021 | 0.321416 | 5.610803 | 1.204303 | 0.229539 | 0.464849 | -5.58171 |
| TNFRSF13B | NM_012452.2    | 0.418 | -0.31701 | 1.686095 | -1.20343 | 0.229877 | 0.464849 | -5.58273 |
| CXCR4     | NM_003467.2    | 0     | -0.13112 | 11.62269 | -1.20333 | 0.229915 | 0.464849 | -5.58285 |
| PSMB8     | NM_004159.4    | 0     | 0.082664 | 8.709897 | 1.201744 | 0.230527 | 0.464849 | -5.58468 |
| ITGAE     | NM_002208.4    | 0     | -0.12333 | 6.747701 | -1.19167 | 0.234448 | 0.470818 | -5.5963  |
| ALCAM     | NM_001627.3    | 0.048 | 0.211222 | 3.985995 | 1.187308 | 0.236161 | 0.472144 | -5.60131 |
| RORA      | NM_134261.2    | 0.003 | -0.17524 | 6.797615 | -1.18509 | 0.237036 | 0.472144 | -5.60384 |
| PIK3CD    | NM_005026.3    | 0     | 0.113814 | 7.459838 | 1.18224  | 0.238162 | 0.472467 | -5.6071  |
| CTLA4     | NM_005214.3    | 0.01  | 0.195131 | 5.860546 | 1.176395 | 0.240485 | 0.475151 | -5.61374 |
| CD9       | NM_001769.2    | 0     | 0.176341 | 6.234418 | 1.170875 | 0.242692 | 0.477587 | -5.61999 |
| CLEC7A    | NM_197954.2    | 0     | 0.171825 | 8.481846 | 1.166744 | 0.244354 | 0.477732 | -5.62465 |
| CD86      | NM_175862.3    | 0.024 | 0.206561 | 5.845976 | 1.165848 | 0.244716 | 0.477732 | -5.62565 |
| TNF       | NM_000594.2    | 0     | -0.16262 | 7.861256 | -1.14891 | 0.25162  | 0.489261 | -5.64456 |
| SH2B2     | NM_020979.3    | 0     | 0.140015 | 6.215647 | 1.146196 | 0.25274  | 0.489496 | -5.64756 |

|          |                |       |          |          |          |          |          |          |
|----------|----------------|-------|----------|----------|----------|----------|----------|----------|
| CD46     | NM_172350.1    | 0     | 0.066854 | 8.729013 | 1.137536 | 0.256334 | 0.494502 | -5.6571  |
| TFE3     | NM_006521.3    | 0.007 | 0.133184 | 4.911264 | 1.134183 | 0.257735 | 0.495255 | -5.66077 |
| TBK1     | NM_013254.2    | 0     | 0.106346 | 6.272289 | 1.129884 | 0.259539 | 0.496773 | -5.66547 |
| MICB     | NM_005931.3    | 0     | -0.08566 | 6.878711 | -1.12635 | 0.261028 | 0.497494 | -5.66931 |
| IFI35    | NM_005533.3    | 0.027 | 0.252497 | 5.329995 | 1.123857 | 0.262083 | 0.497494 | -5.67202 |
| ICOS     | NM_012092.2    | 0.048 | -0.24291 | 5.292234 | -1.12078 | 0.263389 | 0.497494 | -5.67535 |
| CXCL5    | NM_002994.3    | 0.027 | -0.263   | 5.612661 | -1.1194  | 0.263976 | 0.497494 | -5.67685 |
| IRF7     | NM_001572.3    | 0     | -0.12638 | 7.657972 | -1.10964 | 0.268153 | 0.503429 | -5.68734 |
| CTSL     | NM_001912.4    | 0.205 | 0.301792 | 2.912495 | 1.105296 | 0.270026 | 0.503527 | -5.69198 |
| TNFSF12  | NM_003809.2    | 0     | 0.10093  | 7.404735 | 1.104754 | 0.27026  | 0.503527 | -5.69256 |
| TNFRSF18 | NM_004195.2    | 0.247 | -0.24565 | 2.385066 | -1.09407 | 0.274909 | 0.507626 | -5.70389 |
| TNFAIP3  | NM_006290.2    | 0     | 0.156    | 11.40526 | 1.092742 | 0.275492 | 0.507626 | -5.70529 |
| IL2RG    | NM_000206.1    | 0     | -0.11863 | 8.597442 | -1.0907  | 0.276387 | 0.507626 | -5.70744 |
| MAP2K2   | NM_030662.2    | 0     | 0.076097 | 8.356256 | 1.089203 | 0.277046 | 0.507626 | -5.70902 |
| SELL     | NR_029467.1    | 0     | 0.145559 | 9.719688 | 1.087853 | 0.277641 | 0.507626 | -5.71043 |
| NUP107   | NM_020401.2    | 0.003 | -0.08573 | 5.14324  | -1.07134 | 0.284983 | 0.519115 | -5.72764 |
| TNFSF8   | NM_001244.3    | 0.007 | 0.137647 | 5.546341 | 1.066498 | 0.287161 | 0.521145 | -5.73263 |
| TAB1     | NM_153497.2    | 0.027 | 0.168658 | 4.727958 | 1.06405  | 0.288267 | 0.521221 | -5.73515 |
| GPI      | NM_000175.2    | 0     | 0.064859 | 7.81144  | 1.059153 | 0.290487 | 0.523304 | -5.74017 |
| NFKB1    | NM_003998.2    | 0.003 | -0.12429 | 5.891648 | -1.03959 | 0.29947  | 0.537509 | -5.75998 |
| PLAU     | NM_002658.2    | 0.226 | 0.429511 | 4.195883 | 1.034839 | 0.30168  | 0.539501 | -5.76474 |
| TNFRSF8  | NM_152942.2    | 0.373 | -0.23021 | 1.712385 | -1.02707 | 0.305317 | 0.544019 | -5.77248 |
| SOCS1    | NM_003745.1    | 0.024 | 0.20106  | 5.279282 | 1.016683 | 0.310224 | 0.550298 | -5.78272 |
| CD5      | NM_014207.2    | 0.007 | -0.14696 | 7.202144 | -1.01487 | 0.311087 | 0.550298 | -5.7845  |
| KLRK1    | NM_007360.3    | 0.007 | 0.145483 | 8.067134 | 1.007153 | 0.314772 | 0.554815 | -5.79203 |
| PSMD7    | NM_002811.3    | 0     | -0.06573 | 8.443101 | -0.98477 | 0.325626 | 0.570076 | -5.81356 |
| MAP4K2   | NM_004579.2    | 0     | -0.06663 | 6.797415 | -0.98007 | 0.327938 | 0.570076 | -5.81802 |
| CD7      | NM_006137.6    | 0.007 | 0.11356  | 6.90442  | 0.979467 | 0.328235 | 0.570076 | -5.81859 |
| SH2D1A   | NM_001114937.2 | 0.024 | 0.177791 | 5.74523  | 0.977542 | 0.329185 | 0.570076 | -5.82041 |
| CD274    | NM_014143.3    | 0.469 | 0.251653 | 1.515544 | 0.977416 | 0.329248 | 0.570076 | -5.82053 |

|          |                |       |          |          |          |          |          |          |
|----------|----------------|-------|----------|----------|----------|----------|----------|----------|
| CCR1     | NM_001295.2    | 0.007 | 0.160784 | 6.178898 | 0.96233  | 0.336754 | 0.580469 | -5.83466 |
| HLA-DRA  | NM_019111.3    | 0     | 0.089015 | 12.5209  | 0.960605 | 0.33762  | 0.580469 | -5.83627 |
| PRF1     | NM_005041.3    | 0.007 | 0.177752 | 8.437403 | 0.956581 | 0.339644 | 0.581907 | -5.83999 |
| NT5E     | NM_002526.2    | 0.137 | -0.21835 | 2.742171 | -0.94282 | 0.346625 | 0.591799 | -5.85262 |
| IFNAR1   | NM_000629.2    | 0.171 | 0.214814 | 2.674679 | 0.938635 | 0.348766 | 0.593387 | -5.85642 |
| CD48     | NM_001778.2    | 0     | -0.08022 | 10.49278 | -0.93497 | 0.350651 | 0.594388 | -5.85974 |
| IL1RN    | NM_000577.3    | 0.003 | -0.19334 | 7.56642  | -0.93277 | 0.351781 | 0.594388 | -5.86172 |
| TCF7     | NM_003202.2    | 0.021 | -0.17797 | 7.021768 | -0.92874 | 0.35386  | 0.594388 | -5.86534 |
| NCF4     | NM_000631.4    | 0     | 0.128993 | 7.36641  | 0.928075 | 0.354207 | 0.594388 | -5.86594 |
| CSF3R    | NM_156038.2    | 0     | 0.14935  | 10.23874 | 0.921454 | 0.357645 | 0.596571 | -5.87186 |
| CFD      | NM_001928.2    | 0     | 0.124804 | 6.853647 | 0.920883 | 0.357943 | 0.596571 | -5.87237 |
| MSR1     | NM_002445.3    | 0.082 | 0.246619 | 4.379792 | 0.912552 | 0.362301 | 0.601788 | -5.87975 |
| HMGB1    | NM_002128.4    | 0     | 0.052205 | 9.277236 | 0.904732 | 0.366423 | 0.606578 | -5.88661 |
| BCL2L1   | NM_001191.2    | 0     | 0.211185 | 8.230849 | 0.896804 | 0.370631 | 0.611479 | -5.89351 |
| BATF     | NM_006399.3    | 0.021 | 0.137106 | 4.187868 | 0.890613 | 0.373938 | 0.614865 | -5.89886 |
| CARD11   | NM_032415.2    | 0     | 0.089951 | 6.856218 | 0.877357 | 0.381081 | 0.624514 | -5.91019 |
| GZMB     | NM_004131.3    | 0.003 | 0.135831 | 8.566658 | 0.864433 | 0.388126 | 0.633939 | -5.92107 |
| CD37     | NM_001774.2    | 0.003 | -0.07534 | 7.4318   | -0.85578 | 0.392886 | 0.638186 | -5.92826 |
| MAPKAPK2 | NM_004759.3    | 0     | -0.09288 | 8.333636 | -0.85498 | 0.393331 | 0.638186 | -5.92892 |
| ITGB3    | NM_000212.2    | 0.003 | 0.173387 | 6.991195 | 0.849559 | 0.396331 | 0.640932 | -5.93339 |
| CD40LG   | NM_000074.2    | 0.082 | -0.18764 | 3.887451 | -0.83753 | 0.403045 | 0.649645 | -5.9432  |
| IL23A    | NM_016584.2    | 0.291 | -0.19586 | 1.983131 | -0.834   | 0.405027 | 0.650698 | -5.94605 |
| CYLD     | NM_015247.1    | 0     | -0.06649 | 8.50695  | -0.82771 | 0.408572 | 0.65237  | -5.9511  |
| ICAM1    | NM_000201.2    | 0     | 0.131221 | 7.861002 | 0.82738  | 0.40876  | 0.65237  | -5.95137 |
| LAMP1    | NM_005561.3    | 0     | 0.04741  | 8.754433 | 0.825082 | 0.410061 | 0.65237  | -5.9532  |
| DDX58    | NM_014314.3    | 0.031 | -0.17794 | 5.32417  | -0.81779 | 0.414209 | 0.656048 | -5.959   |
| TNFSF10  | NM_003810.2    | 0     | 0.127017 | 7.480651 | 0.816309 | 0.415051 | 0.656048 | -5.96016 |
| TNFSF4   | NM_003326.2    | 0.007 | 0.138104 | 4.998437 | 0.812449 | 0.417258 | 0.657416 | -5.9632  |
| IFIT2    | NM_001547.4    | 0.003 | 0.182496 | 6.889349 | 0.802861 | 0.422769 | 0.663551 | -5.97069 |
| ENG      | NM_001114753.1 | 0.051 | 0.165274 | 4.763187 | 0.800972 | 0.42386  | 0.663551 | -5.97216 |

|                           |                |       |          |          |          |          |          |          |
|---------------------------|----------------|-------|----------|----------|----------|----------|----------|----------|
| ANP32B                    | NM_006401.2    | 0     | 0.072397 | 8.430959 | 0.795511 | 0.427022 | 0.665921 | -5.97637 |
| KIR_Inhibiting_Subgroup_1 | NM_014218.2    | 0.243 | 0.198002 | 2.723496 | 0.79367  | 0.428092 | 0.665921 | -5.97778 |
| LTB                       | NM_002341.1    | 0     | -0.09931 | 9.500478 | -0.78993 | 0.430267 | 0.667187 | -5.98065 |
| LAG3                      | NM_002286.5    | 0.065 | 0.18651  | 4.59753  | 0.787012 | 0.431973 | 0.667718 | -5.98287 |
| PSEN2                     | NM_000447.2    | 0.058 | -0.14173 | 3.557444 | -0.77797 | 0.437274 | 0.673787 | -5.98971 |
| PRKCD                     | NM_006254.3    | 0     | 0.08415  | 8.691483 | 0.770011 | 0.441974 | 0.677755 | -5.99567 |
| IRF2                      | NM_002199.3    | 0     | 0.091535 | 6.093233 | 0.768928 | 0.442616 | 0.677755 | -5.99648 |
| LAMP2                     | NM_001122606.1 | 0     | 0.060872 | 7.314486 | 0.765619 | 0.444579 | 0.678641 | -5.99894 |
| TNFRSF10C                 | NM_003841.3    | 0.106 | 0.252148 | 5.144526 | 0.750379 | 0.453687 | 0.688358 | -6.01011 |
| IFIH1                     | NM_022168.2    | 0.003 | 0.112874 | 6.062449 | 0.749364 | 0.454297 | 0.688358 | -6.01085 |
| SERPINB2                  | NM_002575.1    | 0.075 | 0.264692 | 5.633046 | 0.746413 | 0.456075 | 0.688358 | -6.01298 |
| CXCL3                     | NM_002090.2    | 0.267 | 0.269806 | 3.587643 | 0.745601 | 0.456564 | 0.688358 | -6.01357 |
| PIN1                      | NM_006221.2    | 0     | 0.050952 | 6.588471 | 0.737149 | 0.461679 | 0.693934 | -6.01963 |
| KLRB1                     | NM_002258.2    | 0.007 | -0.1207  | 7.909012 | -0.72968 | 0.466225 | 0.698117 | -6.02493 |
| CKLF                      | NM_181640.2    | 0     | 0.107452 | 7.308658 | 0.727902 | 0.467311 | 0.698117 | -6.02618 |
| BAX                       | NM_138761.3    | 0     | 0.038979 | 8.163919 | 0.713712 | 0.476028 | 0.708978 | -6.03608 |
| TBX21                     | NM_013351.1    | 0.007 | -0.11193 | 6.936496 | -0.70986 | 0.478412 | 0.709951 | -6.03873 |
| DUSP4                     | NM_057158.2    | 0.164 | 0.205445 | 3.536306 | 0.707973 | 0.479579 | 0.709951 | -6.04002 |
| RELB                      | NM_006509.2    | 0     | -0.09121 | 6.86915  | -0.7028  | 0.482795 | 0.712559 | -6.04356 |
| GTF3C1                    | NM_001520.3    | 0.007 | 0.066569 | 5.445361 | 0.69324  | 0.488761 | 0.717427 | -6.05001 |
| CD38                      | NM_001775.2    | 0.007 | 0.121672 | 5.552394 | 0.692824 | 0.489022 | 0.717427 | -6.05029 |
| IRF3                      | NM_001571.5    | 0.01  | -0.07695 | 5.322492 | -0.68509 | 0.493884 | 0.722314 | -6.05545 |
| KLRG1                     | NM_005810.3    | 0.051 | 0.166372 | 5.268751 | 0.679453 | 0.497439 | 0.722314 | -6.05917 |
| DPP4                      | NM_001935.3    | 0.366 | -0.15601 | 1.721784 | -0.6752  | 0.500134 | 0.722314 | -6.06196 |
| FOXJ1                     | NM_001454.3    | 0     | -0.09016 | 5.448176 | -0.66972 | 0.503613 | 0.722314 | -6.06552 |
| EGR2                      | NM_000399.3    | 0.164 | -0.22262 | 3.880796 | -0.66774 | 0.504876 | 0.722314 | -6.0668  |
| CXCR2                     | NM_001557.2    | 0.058 | -0.21933 | 6.028551 | -0.66629 | 0.505803 | 0.722314 | -6.06774 |
| CCL5                      | NM_002985.2    | 0     | 0.082077 | 10.74778 | 0.665168 | 0.506517 | 0.722314 | -6.06846 |
| CCR5                      | NM_000579.1    | 0.462 | 0.155936 | 1.57749  | 0.664095 | 0.507202 | 0.722314 | -6.06915 |
| CD3G                      | NM_000073.2    | 0.021 | -0.1302  | 6.111588 | -0.65975 | 0.509981 | 0.722314 | -6.07193 |



|                           |                |       |          |          |          |          |          |          |
|---------------------------|----------------|-------|----------|----------|----------|----------|----------|----------|
| IRAK2                     | NM_001570.3    | 0.021 | -0.13135 | 4.751827 | -0.65829 | 0.51092  | 0.722314 | -6.07287 |
| TIGIT                     | NM_173799.2    | 0.096 | -0.15282 | 3.561425 | -0.65682 | 0.511862 | 0.722314 | -6.0738  |
| IL2RB                     | NM_000878.2    | 0.014 | 0.109737 | 7.075061 | 0.655099 | 0.512968 | 0.722314 | -6.07489 |
| PPBP                      | NM_002704.2    | 0     | 0.115215 | 11.85189 | 0.654403 | 0.513415 | 0.722314 | -6.07533 |
| PRKCE                     | NM_005400.2    | 0.151 | -0.14312 | 3.082404 | -0.65371 | 0.513861 | 0.722314 | -6.07577 |
| IRAK4                     | NM_016123.1    | 0.007 | 0.075115 | 5.477751 | 0.652772 | 0.514465 | 0.722314 | -6.07637 |
| C1QBP                     | NM_001212.3    | 0     | -0.05194 | 7.336941 | -0.64573 | 0.519007 | 0.72661  | -6.08079 |
| FUT7                      | NM_004479.3    | 0.058 | 0.160506 | 4.629216 | 0.642962 | 0.5208   | 0.727043 | -6.08252 |
| SLAMF6                    | NM_001184714.1 | 0.267 | 0.174256 | 2.493996 | 0.639    | 0.523371 | 0.728556 | -6.08498 |
| IRAK1                     | NM_001569.3    | 0     | 0.046043 | 7.226552 | 0.63211  | 0.527856 | 0.729807 | -6.08921 |
| MAF                       | NM_005360.4    | 0.021 | 0.102955 | 5.451789 | 0.631047 | 0.528549 | 0.729807 | -6.08986 |
| LY86                      | NM_004271.3    | 0     | 0.06966  | 7.733498 | 0.630759 | 0.528738 | 0.729807 | -6.09004 |
| TAP1                      | NM_000593.5    | 0     | 0.061778 | 7.406064 | 0.621813 | 0.534595 | 0.735819 | -6.09546 |
| ITK                       | NM_005546.3    | 0.007 | -0.08546 | 7.219445 | -0.61307 | 0.540351 | 0.741658 | -6.10069 |
| IGF1R                     | NM_000875.2    | 0     | -0.09329 | 6.296926 | -0.59851 | 0.550005 | 0.752801 | -6.10922 |
| JAK1                      | NM_002227.1    | 0     | -0.02647 | 9.228152 | -0.59358 | 0.553298 | 0.755198 | -6.11207 |
| ATF1                      | NM_005171.2    | 0.007 | 0.064509 | 5.483778 | 0.584195 | 0.559582 | 0.755281 | -6.11742 |
| KLRF1                     | NM_016523.1    | 0.086 | 0.128842 | 5.228966 | 0.582103 | 0.560989 | 0.755281 | -6.1186  |
| CD6                       | NM_006725.3    | 0.014 | -0.09331 | 6.383183 | -0.5817  | 0.561262 | 0.755281 | -6.11883 |
| MAP3K5                    | NM_005923.3    | 0     | 0.048765 | 7.51705  | 0.58132  | 0.561515 | 0.755281 | -6.11904 |
| KIR_Activating_Subgroup_1 | NM_001083539.1 | 0.469 | 0.157441 | 1.847964 | 0.580201 | 0.562268 | 0.755281 | -6.11967 |
| CD8A                      | NM_001768.5    | 0     | 0.086842 | 7.865574 | 0.579697 | 0.562607 | 0.755281 | -6.11996 |
| NCAM1                     | NM_000615.5    | 0.017 | 0.090715 | 4.312272 | 0.576399 | 0.564831 | 0.755488 | -6.1218  |
| TXNIP                     | NM_006472.1    | 0     | 0.050863 | 12.29742 | 0.574896 | 0.565845 | 0.755488 | -6.12264 |
| LYN                       | NM_002350.1    | 0     | -0.05401 | 8.412352 | -0.56243 | 0.574293 | 0.763836 | -6.1295  |
| CD74                      | NM_001025159.1 | 0     | 0.044411 | 12.72202 | 0.561077 | 0.575215 | 0.763836 | -6.13024 |
| LTF                       | NM_002343.2    | 0.075 | -0.18905 | 5.321943 | -0.55319 | 0.580597 | 0.765386 | -6.13449 |
| ICOSLG                    | NM_015259.4    | 0.055 | -0.11617 | 4.973823 | -0.55096 | 0.582125 | 0.765386 | -6.13569 |
| HLA-E                     | NM_005516.4    | 0     | -0.03671 | 11.6039  | -0.5504  | 0.582508 | 0.765386 | -6.13599 |
| CMKLR1                    | NM_004072.1    | 0.301 | -0.15721 | 2.531657 | -0.54728 | 0.584642 | 0.765386 | -6.13764 |

|          |             |       |          |          |          |          |          |          |
|----------|-------------|-------|----------|----------|----------|----------|----------|----------|
| PDGFC    | NM_016205.2 | 0.147 | 0.127587 | 3.027464 | 0.546938 | 0.584878 | 0.765386 | -6.13782 |
| NFKB2    | NM_002502.2 | 0     | -0.08354 | 9.49988  | -0.54566 | 0.585755 | 0.765386 | -6.1385  |
| TIRAP    | NM_148910.2 | 0.144 | 0.10212  | 2.624071 | 0.539999 | 0.589648 | 0.768424 | -6.14147 |
| SH2D1B   | NM_053282.4 | 0.205 | 0.127367 | 3.706056 | 0.531929 | 0.595217 | 0.772076 | -6.14566 |
| CCL4     | NM_002984.2 | 0     | -0.10204 | 7.435982 | -0.53137 | 0.595602 | 0.772076 | -6.14595 |
| TAPBP    | NM_003190.4 | 0     | -0.03953 | 9.857129 | -0.52364 | 0.600964 | 0.775909 | -6.1499  |
| OSM      | NM_020530.4 | 0.014 | 0.103228 | 6.986592 | 0.522543 | 0.601726 | 0.775909 | -6.15045 |
| SLAMF7   | NM_021181.3 | 0     | -0.0631  | 6.269028 | -0.51533 | 0.606749 | 0.780333 | -6.15408 |
| IL6      | NM_000600.1 | 0.027 | -0.1025  | 5.194713 | -0.5113  | 0.609566 | 0.781904 | -6.15608 |
| NOTCH1   | NM_017617.3 | 0.007 | 0.065892 | 6.163288 | 0.497987 | 0.618903 | 0.791808 | -6.16259 |
| LY96     | NM_015364.2 | 0     | 0.068447 | 7.682891 | 0.49385  | 0.621818 | 0.792174 | -6.16458 |
| MAP2K4   | NM_003010.2 | 0.171 | 0.114138 | 2.860254 | 0.492993 | 0.622422 | 0.792174 | -6.16499 |
| CD99     | NM_002414.3 | 0     | 0.039699 | 10.01378 | 0.487579 | 0.626248 | 0.794978 | -6.16756 |
| IL1RAP   | NM_002182.2 | 0     | 0.082964 | 6.01225  | 0.478809 | 0.632466 | 0.800797 | -6.17166 |
| MAVS     | NM_020746.3 | 0.031 | 0.079156 | 4.40858  | 0.474239 | 0.635717 | 0.802838 | -6.17377 |
| CREB1    | NM_004379.3 | 0     | -0.04394 | 5.91797  | -0.46567 | 0.64183  | 0.808475 | -6.17767 |
| ITGA4    | NM_000885.4 | 0     | -0.03618 | 7.624805 | -0.45906 | 0.646562 | 0.812347 | -6.18063 |
| NFATC2   | NM_012340.3 | 0     | -0.04736 | 7.254581 | -0.45645 | 0.648437 | 0.81262  | -6.18179 |
| CD247    | NM_198053.1 | 0.007 | -0.0648  | 7.876366 | -0.45124 | 0.652183 | 0.815228 | -6.18408 |
| CCR7     | NM_001838.2 | 0.113 | -0.10635 | 3.873809 | -0.44737 | 0.654971 | 0.81663  | -6.18576 |
| IL7R     | NM_002185.2 | 0.01  | 0.074895 | 7.407723 | 0.443184 | 0.657991 | 0.818314 | -6.18757 |
| CTSW     | NM_001335.3 | 0.003 | -0.06211 | 7.625144 | -0.43115 | 0.666705 | 0.825267 | -6.19266 |
| FCGR3A   | NM_000569.6 | 0     | 0.063344 | 8.819493 | 0.430815 | 0.66695  | 0.825267 | -6.1928  |
| CD70     | NM_001252.2 | 0.346 | 0.099249 | 1.907375 | 0.422646 | 0.672894 | 0.828542 | -6.19618 |
| CD2      | NM_001767.3 | 0.072 | -0.09664 | 4.100804 | -0.42253 | 0.672979 | 0.828542 | -6.19623 |
| GNLY     | NM_006433.2 | 0.003 | 0.072766 | 9.647454 | 0.416881 | 0.6771   | 0.831526 | -6.19852 |
| KIR3DL2  | NM_006737.2 | 0.253 | 0.101491 | 2.487052 | 0.409278 | 0.682664 | 0.836263 | -6.20157 |
| HLA-DPA1 | NM_033554.2 | 0     | 0.041226 | 10.29383 | 0.398379 | 0.690669 | 0.842505 | -6.20583 |
| CCR6     | NM_031409.2 | 0.301 | 0.089742 | 2.05276  | 0.396606 | 0.691975 | 0.842505 | -6.20651 |
| STAT4    | NM_003151.2 | 0.003 | 0.055443 | 6.168636 | 0.395326 | 0.692918 | 0.842505 | -6.20701 |

|          |                |       |          |          |          |          |          |          |
|----------|----------------|-------|----------|----------|----------|----------|----------|----------|
| PLA2G6   | NM_001004426.1 | 0.034 | 0.062979 | 4.049692 | 0.374932 | 0.708008 | 0.858723 | -6.21462 |
| ICAM2    | NM_000873.3    | 0     | 0.038713 | 6.419583 | 0.370028 | 0.711655 | 0.861015 | -6.21639 |
| MAP3K7   | NM_145333.1    | 0     | -0.02225 | 6.651272 | -0.36331 | 0.716661 | 0.864935 | -6.21877 |
| CD8B     | NM_004931.3    | 0.024 | -0.06884 | 5.952351 | -0.35804 | 0.720594 | 0.866057 | -6.22061 |
| HLA-A    | NM_002116.5    | 0     | -0.02245 | 13.45711 | -0.35616 | 0.722004 | 0.866057 | -6.22126 |
| NOD1     | NM_006092.1    | 0.082 | 0.070752 | 3.62329  | 0.35497  | 0.722892 | 0.866057 | -6.22167 |
| TREM1    | NM_018643.3    | 0     | 0.05993  | 9.971133 | 0.351419 | 0.725551 | 0.867086 | -6.22289 |
| HLA-C    | NM_002117.4    | 0     | -0.02462 | 12.6451  | -0.34772 | 0.728322 | 0.867086 | -6.22414 |
| HLA-G    | NM_002127.4    | 0     | 0.027393 | 7.159786 | 0.34674  | 0.72906  | 0.867086 | -6.22447 |
| FCER1A   | NM_002001.2    | 0.12  | -0.10606 | 4.494639 | -0.34261 | 0.732159 | 0.868663 | -6.22585 |
| CD83     | NM_004233.3    | 0     | -0.04348 | 10.15734 | -0.33821 | 0.735468 | 0.870481 | -6.2273  |
| ATG16L1  | NM_198890.2    | 0.007 | 0.038797 | 5.877359 | 0.332187 | 0.740008 | 0.873745 | -6.22926 |
| SMAD2    | NM_005901.5    | 0     | -0.02256 | 6.605892 | -0.31467 | 0.753261 | 0.887255 | -6.23475 |
| HLA-DQB1 | NM_002123.3    | 0.315 | 0.146759 | 5.682745 | 0.305144 | 0.760494 | 0.887905 | -6.23761 |
| CD55     | NM_000574.3    | 0.264 | -0.0769  | 2.574407 | -0.30312 | 0.762034 | 0.887905 | -6.23821 |
| CCR3     | NM_001837.2    | 0.455 | 0.07209  | 1.557105 | 0.302895 | 0.762206 | 0.887905 | -6.23827 |
| CCL3     | NM_002983.2    | 0     | 0.043411 | 9.06783  | 0.302508 | 0.7625   | 0.887905 | -6.23839 |
| CASP3    | NM_032991.2    | 0.007 | -0.03391 | 5.030588 | -0.29985 | 0.764524 | 0.887905 | -6.23916 |
| REL      | NM_002908.2    | 0     | 0.029579 | 7.632005 | 0.298811 | 0.765316 | 0.887905 | -6.23946 |
| JAM3     | NM_032801.3    | 0.027 | 0.067402 | 4.903156 | 0.297262 | 0.766497 | 0.887905 | -6.23991 |
| IFNG     | NM_000619.2    | 0.007 | -0.0556  | 6.625883 | -0.28737 | 0.774054 | 0.89368  | -6.24271 |
| ITCH     | NM_001257138.1 | 0     | 0.019578 | 8.069219 | 0.285335 | 0.775608 | 0.89368  | -6.24328 |
| CD96     | NM_005816.4    | 0.007 | 0.039741 | 6.991743 | 0.283576 | 0.776955 | 0.89368  | -6.24376 |
| TRAF3    | NM_145725.1    | 0     | -0.02097 | 7.01356  | -0.27291 | 0.78513  | 0.900969 | -6.24664 |
| IFNAR2   | NM_000874.3    | 0     | -0.0178  | 8.301537 | -0.25417 | 0.799561 | 0.915386 | -6.25142 |
| NFKBIA   | NM_020529.1    | 0     | -0.03524 | 13.49199 | -0.2503  | 0.802547 | 0.916662 | -6.25237 |
| SLAMF1   | NM_003037.2    | 0.205 | 0.056232 | 2.599121 | 0.238585 | 0.81161  | 0.922816 | -6.25515 |
| ELK1     | NM_005229.3    | 0.031 | -0.03834 | 4.493141 | -0.23847 | 0.811702 | 0.922816 | -6.25517 |
| CD58     | NM_001779.2    | 0     | 0.019209 | 7.622745 | 0.234017 | 0.815151 | 0.924593 | -6.25619 |
| ICAM3    | NM_002162.3    | 0     | -0.01441 | 9.390235 | -0.22991 | 0.818337 | 0.926063 | -6.25711 |

|          |                |       |          |          |          |          |          |          |
|----------|----------------|-------|----------|----------|----------|----------|----------|----------|
| EGR1     | NM_001964.2    | 0.031 | -0.06297 | 6.703873 | -0.22559 | 0.821694 | 0.927719 | -6.25807 |
| PIK3CG   | NM_002649.2    | 0.003 | 0.021167 | 7.079316 | 0.220663 | 0.825523 | 0.928016 | -6.25913 |
| IL32     | NM_001012633.1 | 0     | -0.02787 | 10.97232 | -0.22038 | 0.825745 | 0.928016 | -6.2592  |
| IFITM2   | NM_006435.2    | 0     | 0.027574 | 10.97691 | 0.21571  | 0.829378 | 0.929966 | -6.26018 |
| CD81     | NM_004356.3    | 0     | -0.01507 | 9.013876 | -0.21286 | 0.8316   | 0.930329 | -6.26077 |
| IL1B     | NM_000576.2    | 0.031 | -0.0632  | 6.876044 | -0.20496 | 0.837758 | 0.933469 | -6.26237 |
| MICA     | NM_000247.1    | 0.178 | 0.045088 | 2.747806 | 0.204374 | 0.838217 | 0.933469 | -6.26249 |
| GZMH     | NM_033423.3    | 0.007 | -0.03749 | 8.230464 | -0.18699 | 0.851814 | 0.944169 | -6.26579 |
| BID      | NM_001196.2    | 0.038 | 0.023479 | 5.419228 | 0.184212 | 0.853987 | 0.944169 | -6.26629 |
| TANK     | NM_004180.2    | 0     | 0.016213 | 8.704286 | 0.183679 | 0.854405 | 0.944169 | -6.26638 |
| XCL2     | NM_003175.3    | 0.038 | 0.040662 | 5.62487  | 0.181733 | 0.85593  | 0.944169 | -6.26673 |
| IFI27    | NM_005532.3    | 0.202 | -0.08698 | 4.944098 | -0.17978 | 0.85746  | 0.944169 | -6.26707 |
| CD28     | NM_001243078.1 | 0.178 | 0.045639 | 3.234351 | 0.177082 | 0.859578 | 0.944379 | -6.26753 |
| IL2RA    | NM_000417.1    | 0.318 | 0.03794  | 1.886076 | 0.173342 | 0.862514 | 0.945485 | -6.26817 |
| IL12RB1  | NM_005535.1    | 0     | -0.01462 | 5.68807  | -0.16419 | 0.869706 | 0.949836 | -6.26967 |
| ISG20    | NM_002201.4    | 0     | -0.01739 | 7.838453 | -0.16336 | 0.87036  | 0.949836 | -6.2698  |
| HLA-B    | NM_005514.6    | 0     | 0.00947  | 13.57856 | 0.159285 | 0.873565 | 0.951215 | -6.27044 |
| CD164    | NM_006016.4    | 0     | -0.01112 | 8.347077 | -0.15547 | 0.876566 | 0.951447 | -6.27102 |
| ABCB1    | NM_000927.3    | 0.092 | 0.034371 | 3.909035 | 0.151775 | 0.879479 | 0.951447 | -6.27157 |
| CCL3L1   | NM_021006.4    | 0     | 0.021425 | 8.932008 | 0.148787 | 0.881834 | 0.951447 | -6.272   |
| TP53     | NM_000546.2    | 0.014 | 0.024703 | 5.277781 | 0.147987 | 0.882465 | 0.951447 | -6.27212 |
| ADA      | NM_000022.2    | 0.007 | 0.018869 | 5.724951 | 0.146691 | 0.883487 | 0.951447 | -6.2723  |
| IL4R     | NM_000418.2    | 0     | -0.01432 | 7.572045 | -0.13982 | 0.888905 | 0.953758 | -6.27326 |
| CSF1     | NM_000757.4    | 0.236 | 0.037627 | 2.980229 | 0.133434 | 0.893951 | 0.953758 | -6.2741  |
| IL8      | NM_000584.2    | 0     | 0.028588 | 13.13576 | 0.133118 | 0.8942   | 0.953758 | -6.27414 |
| FOS      | NM_005252.2    | 0     | -0.014   | 12.90851 | -0.13092 | 0.895937 | 0.953758 | -6.27443 |
| HLA-DRB4 | NM_021983.4    | 0.586 | 0.073017 | 3.564225 | 0.130382 | 0.896362 | 0.953758 | -6.27449 |
| CD3E     | NM_000733.2    | 0.003 | -0.01844 | 7.960763 | -0.12918 | 0.897311 | 0.953758 | -6.27464 |
| TLR7     | NM_016562.3    | 0.473 | 0.028725 | 1.375682 | 0.124809 | 0.900769 | 0.955361 | -6.27518 |
| LCK      | NM_005356.2    | 0.003 | 0.015288 | 7.600179 | 0.119009 | 0.905358 | 0.955373 | -6.27587 |

|                                                     |                |       |          |          |          |          |          |          |
|-----------------------------------------------------|----------------|-------|----------|----------|----------|----------|----------|----------|
| EP300                                               | NM_001429.2    | 0     | 0.008872 | 8.468199 | 0.118006 | 0.906152 | 0.955373 | -6.27598 |
| CASP8                                               | NM_001228.4    | 0     | 0.013473 | 8.914187 | 0.117402 | 0.90663  | 0.955373 | -6.27605 |
| MEF2C                                               | NM_002397.3    | 0.01  | 0.022107 | 6.102815 | 0.114295 | 0.90909  | 0.95591  | -6.2764  |
| IL21R                                               | NM_021798.2    | 0.082 | -0.02388 | 3.908427 | -0.10849 | 0.913691 | 0.95869  | -6.27703 |
| CXCR1                                               | NM_000634.2    | 0.38  | 0.029819 | 2.291848 | 0.103293 | 0.917808 | 0.959785 | -6.27756 |
| ILF3                                                | NM_001137673.1 | 0     | -0.00636 | 8.574618 | -0.10083 | 0.919762 | 0.959785 | -6.27781 |
| PTGS2                                               | NM_000963.1    | 0.034 | -0.02776 | 6.713789 | -0.09976 | 0.92061  | 0.959785 | -6.27791 |
| HLA-DPB1                                            | NM_002121.4    | 0     | 0.008911 | 10.31264 | 0.090592 | 0.927885 | 0.964743 | -6.27876 |
| CD160                                               | NM_007053.2    | 0.171 | 0.025251 | 3.418159 | 0.088165 | 0.929812 | 0.964743 | -6.27897 |
| NCR1                                                | NM_004829.5    | 0.017 | 0.015649 | 5.426898 | 0.086325 | 0.931272 | 0.964743 | -6.27912 |
| TNFRSF10B                                           | NM_003842.3    | 0.014 | 0.009215 | 5.712225 | 0.080559 | 0.935853 | 0.967443 | -6.27959 |
| MR1                                                 | NM_001531.2    | 0.062 | 0.013608 | 3.313179 | 0.075356 | 0.939988 | 0.969671 | -6.27998 |
| UBC                                                 | NM_021009.3    | 0     | 0.005621 | 14.08619 | 0.071885 | 0.942747 | 0.970475 | -6.28023 |
| CD97                                                | NM_078481.2    | 0     | 0.005598 | 10.53952 | 0.068805 | 0.945197 | 0.970957 | -6.28044 |
| CXCR3                                               | NM_001504.1    | 0.11  | -0.01382 | 3.638518 | -0.06107 | 0.95135  | 0.973516 | -6.28093 |
| PECAM1                                              | NM_000442.3    | 0     | -0.00519 | 9.144289 | -0.06068 | 0.951661 | 0.973516 | -6.28095 |
| TGFB1                                               | NM_000660.3    | 0     | 0.00438  | 10.95069 | 0.052625 | 0.95807  | 0.977248 | -6.28139 |
| POU2F2                                              | NM_002698.2    | 0.003 | 0.005652 | 6.756974 | 0.04907  | 0.9609   | 0.977248 | -6.28157 |
| CD3D                                                | NM_000732.4    | 0.003 | -0.00733 | 8.308636 | -0.04858 | 0.961293 | 0.977248 | -6.28159 |
| CD1C                                                | NM_001765.2    | 0.113 | 0.009095 | 4.009041 | 0.033189 | 0.973549 | 0.985803 | -6.2822  |
| PSMB7                                               | NM_002799.2    | 0     | 0.001904 | 8.642375 | 0.032958 | 0.973732 | 0.985803 | -6.28221 |
| BST2                                                | NM_004335.2    | 0     | -0.00305 | 6.971434 | -0.02816 | 0.977558 | 0.986877 | -6.28235 |
| KLRD1                                               | NM_002262.3    | 0.014 | 0.005411 | 6.719953 | 0.026573 | 0.978821 | 0.986877 | -6.28239 |
| TARP                                                | NM_001003799.1 | 0.003 | 0.003025 | 6.887268 | 0.020198 | 0.983901 | 0.989914 | -6.28254 |
| MME                                                 | NM_000902.2    | 0.216 | 0.006527 | 4.285765 | 0.017722 | 0.985874 | 0.989914 | -6.28258 |
| HLA-DQA1                                            | NM_002122.3    | 0.325 | 0.007192 | 6.135714 | 0.013953 | 0.988878 | 0.9909   | -6.28264 |
| LCN2                                                | NM_005564.3    | 0.007 | 0.000404 | 6.196887 | 0.001742 | 0.998611 | 0.998611 | -6.28273 |
| <b>C. D-Rd at C3D1 versus C1D1, CyTOF corrected</b> |                |       |          |          |          |          |          |          |
| TICAM1                                              | NM_014261.1    | 0.003 | -1.21069 | 6.484478 | -3.49476 | 0.001062 | 0.520404 | -4.34817 |
| TFE3                                                | NM_006521.3    | 0.007 | -1.39809 | 4.812652 | -2.93857 | 0.005142 | 0.933739 | -4.41643 |

|           |             |       |          |          |          |          |          |          |
|-----------|-------------|-------|----------|----------|----------|----------|----------|----------|
| NFATC1    | NM_172389.1 | 0.007 | -1.09311 | 5.167577 | -2.76575 | 0.00815  | 0.933739 | -4.4368  |
| SH2B2     | NM_020979.3 | 0     | -1.08561 | 6.308864 | -2.7514  | 0.008462 | 0.933739 | -4.43847 |
| CD40      | NM_001250.4 | 0.021 | 1.439695 | 5.185361 | 2.705796 | 0.009528 | 0.933739 | -4.44374 |
| CD19      | NM_001770.4 | 0.055 | 1.534883 | 4.931502 | 2.525745 | 0.015056 | 0.966676 | -4.46414 |
| CEBPB     | NM_005194.2 | 0     | -0.8497  | 9.624956 | -2.46144 | 0.017651 | 0.966676 | -4.47125 |
| TXNIP     | NM_006472.1 | 0     | -0.73084 | 12.34162 | -2.40301 | 0.020354 | 0.966676 | -4.47763 |
| CLEC4C    | NM_203503.1 | 0.455 | -1.95706 | 1.795366 | -2.3847  | 0.021274 | 0.966676 | -4.47961 |
| CYBB      | NM_000397.3 | 0     | 0.75861  | 9.618004 | 2.254127 | 0.028998 | 0.966676 | -4.49346 |
| BLK       | NM_001715.2 | 0.12  | 1.572592 | 3.613267 | 2.196412 | 0.033144 | 0.966676 | -4.49944 |
| IGF1R     | NM_000875.2 | 0     | -1.08298 | 6.662979 | -2.18286 | 0.034191 | 0.966676 | -4.50083 |
| HLA-DRB4  | NM_021983.4 | 0.586 | 3.582443 | 3.214603 | 2.104246 | 0.040855 | 0.966676 | -4.50877 |
| IL1RAP    | NM_002182.2 | 0     | -1.17748 | 6.309927 | -2.10279 | 0.040989 | 0.966676 | -4.50892 |
| CCRL2     | NM_003965.4 | 0.072 | 1.249169 | 4.064196 | 2.100226 | 0.041225 | 0.966676 | -4.50918 |
| ADORA2A   | NM_000675.3 | 0.003 | -1.41942 | 6.821263 | -2.06434 | 0.044655 | 0.966676 | -4.51274 |
| CXCR2     | NM_001557.2 | 0.058 | -1.62912 | 6.942205 | -2.05026 | 0.046067 | 0.966676 | -4.51412 |
| DUSP6     | NM_001946.2 | 0     | 1.000039 | 8.452191 | 2.034349 | 0.047709 | 0.966676 | -4.51568 |
| CD22      | NM_001771.2 | 0.068 | 1.493466 | 5.510924 | 1.984124 | 0.053231 | 0.966676 | -4.52054 |
| NFKB2     | NM_002502.2 | 0     | -0.94178 | 9.750106 | -1.96139 | 0.055906 | 0.966676 | -4.52272 |
| CD164     | NM_006016.4 | 0     | 0.461634 | 8.324403 | 1.937604 | 0.058829 | 0.966676 | -4.52497 |
| TRAF6     | NM_145803.1 | 0     | -0.58915 | 6.417511 | -1.91556 | 0.061654 | 0.966676 | -4.52704 |
| TNFRSF13C | NM_052945.3 | 0.045 | 1.218577 | 5.933964 | 1.892025 | 0.064796 | 0.966676 | -4.52924 |
| CD86      | NM_175862.3 | 0.024 | -1.26566 | 5.490634 | -1.88416 | 0.065876 | 0.966676 | -4.52997 |
| NFKBIA    | NM_020529.1 | 0     | -0.90217 | 13.82902 | -1.86501 | 0.068571 | 0.966676 | -4.53173 |
| THBD      | NM_000361.2 | 0.003 | -1.14782 | 8.602248 | -1.85529 | 0.069974 | 0.966676 | -4.53262 |
| CD97      | NM_078481.2 | 0     | -0.46276 | 10.56114 | -1.81775 | 0.075622 | 0.966676 | -4.53603 |
| OSM       | NM_020530.4 | 0.014 | -1.30762 | 7.354942 | -1.78358 | 0.081095 | 0.966676 | -4.53909 |
| IL1RN     | NM_000577.3 | 0.003 | -1.37911 | 7.831008 | -1.76929 | 0.083478 | 0.966676 | -4.54036 |
| IL1R2     | NM_173343.1 | 0.027 | -1.74557 | 6.622486 | -1.76143 | 0.084815 | 0.966676 | -4.54105 |
| STAT1     | NM_007315.2 | 0     | 0.630483 | 8.931527 | 1.731674 | 0.090038 | 0.966676 | -4.54366 |
| TAP2      | NM_000544.3 | 0     | 0.462483 | 7.801693 | 1.72827  | 0.090652 | 0.966676 | -4.54395 |

|          |                |       |          |          |          |          |          |          |
|----------|----------------|-------|----------|----------|----------|----------|----------|----------|
| IL21R    | NM_021798.2    | 0.082 | -1.27301 | 3.672715 | -1.7047  | 0.095001 | 0.966676 | -4.54599 |
| TREM1    | NM_018643.3    | 0     | -1.04106 | 10.27873 | -1.67374 | 0.100974 | 0.966676 | -4.54863 |
| IL10RA   | NM_001558.2    | 0     | -0.44818 | 9.547293 | -1.67164 | 0.10139  | 0.966676 | -4.54881 |
| ITGA2B   | NM_000419.3    | 0     | -0.96104 | 7.979841 | -1.66416 | 0.102884 | 0.966676 | -4.54944 |
| PLA2G6   | NM_001004426.1 | 0.034 | 0.72897  | 4.186342 | 1.640584 | 0.107709 | 0.966676 | -4.55142 |
| IL12RB1  | NM_005535.1    | 0     | 0.478417 | 5.5927   | 1.626033 | 0.11078  | 0.966676 | -4.55262 |
| CD38     | NM_001775.2    | 0.007 | 1.111632 | 5.538861 | 1.592445 | 0.118139 | 0.966676 | -4.55538 |
| TNFAIP3  | NM_006290.2    | 0     | -0.72107 | 11.64834 | -1.58864 | 0.118997 | 0.966676 | -4.55569 |
| ECSIT    | NM_001142464.2 | 0.003 | 0.699679 | 4.991808 | 1.573135 | 0.122546 | 0.966676 | -4.55695 |
| HLA-DRB3 | NM_022555.3    | 0     | 0.515176 | 11.11413 | 1.569918 | 0.123293 | 0.966676 | -4.55721 |
| ITGA5    | NM_002205.2    | 0     | -0.45042 | 7.247719 | -1.54976 | 0.128058 | 0.966676 | -4.55882 |
| CD36     | NM_001001548.2 | 0     | 0.463599 | 9.11305  | 1.522948 | 0.134622 | 0.966676 | -4.56094 |
| KLRG1    | NM_005810.3    | 0.051 | 0.985724 | 5.462645 | 1.517234 | 0.136055 | 0.966676 | -4.56139 |
| NOTCH1   | NM_017617.3    | 0.007 | -0.58336 | 6.291812 | -1.51577 | 0.136423 | 0.966676 | -4.56151 |
| MFGE8    | NM_001114614.1 | 0.055 | -1.09089 | 3.889892 | -1.5026  | 0.139782 | 0.966676 | -4.56253 |
| BCL10    | NM_003921.2    | 0     | -0.37489 | 8.084753 | -1.50062 | 0.140291 | 0.966676 | -4.56269 |
| CD79B    | NM_021602.2    | 0     | 0.73276  | 6.988636 | 1.468895 | 0.148672 | 0.966676 | -4.56513 |
| IL13RA1  | NM_001560.2    | 0     | -0.72096 | 7.264141 | -1.46827 | 0.148841 | 0.966676 | -4.56518 |
| CD37     | NM_001774.2    | 0.003 | -0.72211 | 7.261653 | -1.46475 | 0.149795 | 0.966676 | -4.56544 |
| CD79A    | NM_001783.3    | 0.003 | 0.729146 | 7.370404 | 1.462169 | 0.150498 | 0.966676 | -4.56564 |
| SLC11A1  | NM_000578.2    | 0     | -0.58162 | 8.524329 | -1.46135 | 0.150722 | 0.966676 | -4.5657  |
| CSF3R    | NM_156038.2    | 0     | -0.83159 | 10.61811 | -1.46102 | 0.150812 | 0.966676 | -4.56573 |
| RELA     | NM_021975.2    | 0     | -0.38826 | 6.773554 | -1.45976 | 0.151158 | 0.966676 | -4.56582 |
| CCR7     | NM_001838.2    | 0.113 | -1.07554 | 4.026042 | -1.45677 | 0.151978 | 0.966676 | -4.56605 |
| MAP4K2   | NM_004579.2    | 0     | -0.35266 | 6.850069 | -1.44845 | 0.154277 | 0.966676 | -4.56668 |
| SH2D1B   | NM_053282.4    | 0.205 | -1.21591 | 3.51781  | -1.4425  | 0.155941 | 0.966676 | -4.56713 |
| BATF     | NM_006399.3    | 0.021 | -0.72197 | 4.086645 | -1.42678 | 0.160401 | 0.966676 | -4.5683  |
| REL      | NM_002908.2    | 0     | -0.49236 | 7.611904 | -1.41659 | 0.163343 | 0.966676 | -4.56906 |
| CTSL     | NM_001912.4    | 0.205 | 1.448571 | 2.654839 | 1.402317 | 0.167538 | 0.966676 | -4.57011 |
| AKT3     | NM_181690.1    | 0.003 | -0.57013 | 6.175368 | -1.39865 | 0.168628 | 0.966676 | -4.57038 |

|          |                |       |          |          |          |          |          |          |
|----------|----------------|-------|----------|----------|----------|----------|----------|----------|
| FCER2    | NM_002002.4    | 0.082 | 1.017635 | 4.838727 | 1.393812 | 0.170076 | 0.966676 | -4.57073 |
| ITGB3    | NM_000212.2    | 0.003 | -1.02619 | 7.078078 | -1.3936  | 0.170141 | 0.966676 | -4.57075 |
| TNF      | NM_000594.2    | 0     | -0.69026 | 7.922257 | -1.39156 | 0.170755 | 0.966676 | -4.5709  |
| CFD      | NM_001928.2    | 0     | -0.67912 | 7.118607 | -1.39113 | 0.170883 | 0.966676 | -4.57093 |
| DUSP4    | NM_057158.2    | 0.164 | -1.34182 | 3.60756  | -1.37713 | 0.175141 | 0.966676 | -4.57194 |
| IL11RA   | NM_147162.1    | 0.161 | 0.946338 | 3.286179 | 1.376933 | 0.175202 | 0.966676 | -4.57196 |
| GZMM     | NM_005317.2    | 0.01  | 0.652385 | 5.838119 | 1.370053 | 0.177325 | 0.966676 | -4.57246 |
| CD74     | NM_001025159.1 | 0     | 0.35519  | 12.54212 | 1.362883 | 0.179558 | 0.966676 | -4.57297 |
| LYN      | NM_002350.1    | 0     | -0.48819 | 8.436436 | -1.35714 | 0.181363 | 0.966676 | -4.57338 |
| CD2      | NM_001767.3    | 0.072 | 1.107239 | 4.124985 | 1.35197  | 0.183    | 0.966676 | -4.57375 |
| PRKCE    | NM_005400.2    | 0.151 | -1.06852 | 2.835834 | -1.34275 | 0.185946 | 0.966676 | -4.5744  |
| ELK1     | NM_005229.3    | 0.031 | -0.67682 | 4.410011 | -1.33215 | 0.189379 | 0.966676 | -4.57515 |
| MS4A1    | NM_152866.2    | 0.051 | 1.01409  | 5.957998 | 1.328473 | 0.190579 | 0.966676 | -4.57541 |
| BTLA     | NM_181780.2    | 0.034 | 0.830699 | 4.925785 | 1.315702 | 0.194798 | 0.966676 | -4.5763  |
| THBS1    | NM_003246.2    | 0     | -0.96911 | 10.14454 | -1.31195 | 0.196051 | 0.966676 | -4.57656 |
| IFI35    | NM_005533.3    | 0.027 | 1.007662 | 5.504062 | 1.311    | 0.196369 | 0.966676 | -4.57663 |
| PDGFC    | NM_016205.2    | 0.147 | -0.92684 | 3.22263  | -1.30806 | 0.197355 | 0.966676 | -4.57683 |
| IL18RAP  | NM_003853.2    | 0.065 | -1.13865 | 5.650186 | -1.30197 | 0.199411 | 0.966676 | -4.57725 |
| TNFRSF1B | NM_001066.2    | 0     | -0.45883 | 9.713878 | -1.29805 | 0.200744 | 0.966676 | -4.57752 |
| IL18     | NM_001562.2    | 0.024 | -0.71499 | 5.156855 | -1.29729 | 0.201003 | 0.966676 | -4.57757 |
| ANXA1    | NM_000700.1    | 0     | 0.444556 | 11.06642 | 1.281628 | 0.2064   | 0.966676 | -4.57864 |
| CD274    | NM_014143.3    | 0.469 | 1.103878 | 1.426443 | 1.279311 | 0.207207 | 0.966676 | -4.5788  |
| ARG1     | NM_000045.2    | 0.408 | 1.217947 | 2.621635 | 1.278503 | 0.207489 | 0.966676 | -4.57885 |
| CXCL16   | NM_001100812.1 | 0.003 | -0.67901 | 7.176502 | -1.27664 | 0.20814  | 0.966676 | -4.57898 |
| CD3G     | NM_000073.2    | 0.021 | 0.884528 | 6.097442 | 1.268007 | 0.21118  | 0.966676 | -4.57956 |
| S100B    | NM_006272.1    | 0.5   | 0.985865 | 2.099881 | 1.262216 | 0.213237 | 0.966676 | -4.57995 |
| LAIR2    | NM_002288.3    | 0.014 | 0.677743 | 4.742557 | 1.250116 | 0.217584 | 0.966676 | -4.58076 |
| IFNGR1   | NM_000416.1    | 0     | -0.40018 | 8.702158 | -1.24931 | 0.217877 | 0.966676 | -4.58081 |
| IFITM2   | NM_006435.2    | 0     | -0.58133 | 11.276   | -1.24079 | 0.220978 | 0.966676 | -4.58138 |
| FEZ1     | NM_005103.4    | 0.414 | -0.92888 | 1.798337 | -1.23713 | 0.22232  | 0.966676 | -4.58162 |



|        |                |       |          |          |          |          |          |          |
|--------|----------------|-------|----------|----------|----------|----------|----------|----------|
| CX3CR1 | NM_001337.3    | 0.021 | 1.068401 | 5.709481 | 1.228262 | 0.2256   | 0.966676 | -4.5822  |
| CCND3  | NM_001760.2    | 0     | -0.44014 | 8.792868 | -1.22436 | 0.227053 | 0.966676 | -4.58246 |
| CCR5   | NM_000579.1    | 0.462 | 0.971388 | 1.470938 | 1.223312 | 0.227446 | 0.966676 | -4.58253 |
| ICOSLG | NM_015259.4    | 0.055 | -0.90246 | 4.625151 | -1.22195 | 0.227955 | 0.966676 | -4.58262 |
| TGFB1  | NM_000660.3    | 0     | -0.39576 | 10.97278 | -1.21308 | 0.231296 | 0.966676 | -4.58319 |
| PIK3CG | NM_002649.2    | 0.003 | -0.30769 | 7.102338 | -1.20086 | 0.235955 | 0.966676 | -4.58398 |
| CLEC7A | NM_197954.2    | 0     | -0.53339 | 8.867019 | -1.19922 | 0.236586 | 0.966676 | -4.58408 |
| NLRP3  | NM_001079821.2 | 0     | -0.51367 | 7.962799 | -1.19375 | 0.238699 | 0.966676 | -4.58444 |
| CYFIP2 | NM_001037332.2 | 0     | 0.375732 | 7.808367 | 1.192048 | 0.23936  | 0.966676 | -4.58454 |
| BCL2   | NM_000657.2    | 0     | 0.424431 | 6.051298 | 1.188692 | 0.240665 | 0.966676 | -4.58476 |
| ICAM1  | NM_000201.2    | 0     | -0.62006 | 8.015949 | -1.18636 | 0.241577 | 0.966676 | -4.58491 |
| BMI1   | NM_005180.5    | 0     | -0.47615 | 8.109578 | -1.1782  | 0.244781 | 0.966676 | -4.58542 |
| CAMP   | NM_004345.3    | 0.253 | -1.21435 | 3.309635 | -1.17491 | 0.246081 | 0.966676 | -4.58563 |
| TLR2   | NM_003264.3    | 0     | -0.49999 | 7.830566 | -1.1748  | 0.246126 | 0.966676 | -4.58564 |
| XCL2   | NM_003175.3    | 0.038 | -0.85933 | 5.603926 | -1.16877 | 0.248521 | 0.966676 | -4.58602 |
| BLNK   | NM_013314.2    | 0.432 | 0.789848 | 1.742082 | 1.167782 | 0.248916 | 0.966676 | -4.58608 |
| HLA-B  | NM_005514.6    | 0     | -0.27706 | 13.51642 | -1.15754 | 0.253029 | 0.966676 | -4.58672 |
| IL10   | NM_000572.2    | 0.253 | -0.89241 | 3.047345 | -1.15681 | 0.253324 | 0.966676 | -4.58676 |
| FPR2   | NM_001462.3    | 0.041 | -0.8063  | 5.454238 | -1.15619 | 0.253576 | 0.966676 | -4.5868  |
| ATF1   | NM_005171.2    | 0.007 | 0.536291 | 5.417584 | 1.153602 | 0.254626 | 0.966676 | -4.58696 |
| IL23A  | NM_016584.2    | 0.291 | -0.93591 | 2.108989 | -1.14767 | 0.257043 | 0.966676 | -4.58733 |
| IRF3   | NM_001571.5    | 0.01  | 0.509539 | 5.238257 | 1.146567 | 0.257494 | 0.966676 | -4.5874  |
| TRAF3  | NM_145725.1    | 0     | -0.3199  | 7.125145 | -1.14172 | 0.259484 | 0.966676 | -4.58769 |
| GZMA   | NM_006144.2    | 0.01  | 0.838222 | 8.241182 | 1.140358 | 0.260044 | 0.966676 | -4.58778 |
| PSMB10 | NM_002801.2    | 0     | 0.255618 | 8.863405 | 1.13251  | 0.263293 | 0.966676 | -4.58826 |
| PSMB8  | NM_004159.4    | 0     | 0.304627 | 8.725179 | 1.125226 | 0.266334 | 0.966676 | -4.5887  |
| C1QA   | NM_015991.2    | 0.127 | -0.90696 | 4.005041 | -1.12353 | 0.267045 | 0.966676 | -4.5888  |
| SELL   | NR_029467.1    | 0     | -0.47272 | 9.916742 | -1.12091 | 0.268146 | 0.966676 | -4.58896 |
| HLA-E  | NM_005516.4    | 0     | -0.26993 | 11.62095 | -1.11889 | 0.268998 | 0.966676 | -4.58908 |
| CD200  | NM_005944.5    | 0.226 | 0.772615 | 2.747506 | 1.109018 | 0.273191 | 0.966676 | -4.58968 |

|          |                |       |          |          |          |          |          |          |
|----------|----------------|-------|----------|----------|----------|----------|----------|----------|
| FCGR2B   | NM_001002273.1 | 0.048 | 0.679396 | 5.255136 | 1.104241 | 0.275235 | 0.966676 | -4.58996 |
| KLRF1    | NM_016523.1    | 0.086 | -0.83951 | 5.565089 | -1.10003 | 0.277047 | 0.966676 | -4.59021 |
| DDX58    | NM_014314.3    | 0.031 | 0.692713 | 5.685544 | 1.0981   | 0.277879 | 0.966676 | -4.59033 |
| PSMB9    | NM_002800.4    | 0     | 0.398139 | 8.72407  | 1.094333 | 0.27951  | 0.966676 | -4.59055 |
| STAT6    | NM_003153.3    | 0     | -0.38459 | 9.391131 | -1.09166 | 0.280671 | 0.966676 | -4.59071 |
| TICAM2   | NM_021649.4    | 0.158 | 0.953162 | 2.653328 | 1.08968  | 0.281533 | 0.966676 | -4.59082 |
| MYD88    | NM_002468.3    | 0     | 0.346512 | 8.569967 | 1.089615 | 0.281562 | 0.966676 | -4.59083 |
| BAX      | NM_138761.3    | 0     | 0.223957 | 8.065971 | 1.077143 | 0.287037 | 0.966676 | -4.59156 |
| CYLD     | NM_015247.1    | 0     | -0.29501 | 8.487604 | -1.07005 | 0.290182 | 0.966676 | -4.59197 |
| GZMK     | NM_002104.2    | 0.01  | 0.694104 | 6.677627 | 1.068768 | 0.290754 | 0.966676 | -4.59204 |
| CD28     | NM_001243078.1 | 0.178 | -0.87615 | 3.178077 | -1.06092 | 0.29427  | 0.966676 | -4.5925  |
| SMAD3    | NM_005902.3    | 0     | -0.40931 | 6.1692   | -1.06002 | 0.294675 | 0.966676 | -4.59255 |
| CSF1R    | NM_005211.2    | 0.164 | 1.048766 | 3.562819 | 1.057098 | 0.29599  | 0.966676 | -4.59272 |
| CXCR4    | NM_003467.2    | 0     | -0.36274 | 11.71915 | -1.05629 | 0.296357 | 0.966676 | -4.59276 |
| VEGFA    | NM_001025366.1 | 0     | -0.41144 | 8.070343 | -1.05066 | 0.298905 | 0.966676 | -4.59308 |
| STAT3    | NM_139276.2    | 0     | -0.29706 | 8.892825 | -1.04176 | 0.302973 | 0.966676 | -4.59359 |
| TLR7     | NM_016562.3    | 0.473 | 0.82941  | 1.309267 | 1.04101  | 0.303315 | 0.966676 | -4.59363 |
| TNFSF13  | NM_003808.3    | 0     | 0.37276  | 6.751035 | 1.036681 | 0.305307 | 0.966676 | -4.59387 |
| LILRB3   | NM_006864.2    | 0     | -0.60964 | 8.053259 | -1.035   | 0.306084 | 0.966676 | -4.59397 |
| TNFRSF1A | NM_001065.2    | 0     | -0.33902 | 7.511156 | -1.03198 | 0.307479 | 0.966676 | -4.59414 |
| IL15     | NM_172174.1    | 0.024 | 0.451387 | 4.544888 | 1.030789 | 0.308033 | 0.966676 | -4.59421 |
| IFNAR1   | NM_000629.2    | 0.171 | -0.78159 | 2.773402 | -1.0251  | 0.310681 | 0.966676 | -4.59452 |
| SH2D1A   | NM_001114937.2 | 0.024 | 0.66963  | 5.607209 | 1.022751 | 0.311778 | 0.966676 | -4.59465 |
| S100A8   | NM_002964.3    | 0     | 0.524137 | 13.06959 | 1.018894 | 0.313586 | 0.966676 | -4.59487 |
| EGR1     | NM_001964.2    | 0.031 | 0.897586 | 6.651427 | 1.015287 | 0.315283 | 0.966676 | -4.59507 |
| ST6GAL1  | NM_003032.2    | 0.003 | 0.359546 | 7.072304 | 1.013199 | 0.316268 | 0.966676 | -4.59518 |
| IL2RA    | NM_000417.1    | 0.318 | -0.7237  | 2.036021 | -1.01287 | 0.316423 | 0.966676 | -4.5952  |
| HLA-DPB1 | NM_002121.4    | 0     | 0.315224 | 10.20357 | 1.009739 | 0.317906 | 0.966676 | -4.59537 |
| MME      | NM_000902.2    | 0.216 | -1.24272 | 5.016458 | -1.00971 | 0.317919 | 0.966676 | -4.59537 |
| IRF4     | NM_002460.1    | 0.003 | -0.62267 | 6.239596 | -1.00905 | 0.318234 | 0.966676 | -4.59541 |

|         |                |       |          |          |          |          |          |          |
|---------|----------------|-------|----------|----------|----------|----------|----------|----------|
| CD180   | NM_005582.2    | 0.164 | 0.914516 | 2.984111 | 1.006203 | 0.319585 | 0.966676 | -4.59557 |
| HLA-DRA | NM_019111.3    | 0     | 0.296431 | 12.4152  | 1.002291 | 0.32145  | 0.966676 | -4.59578 |
| ADA     | NM_000022.2    | 0.007 | 0.318975 | 5.661062 | 0.9933   | 0.325764 | 0.966676 | -4.59627 |
| TLR1    | NM_003263.3    | 0     | -0.35461 | 7.71714  | -0.99276 | 0.326023 | 0.966676 | -4.5963  |
| MX1     | NM_002462.2    | 0     | -0.55782 | 7.86973  | -0.99035 | 0.327186 | 0.966676 | -4.59643 |
| CKLF    | NM_181640.2    | 0     | 0.470493 | 7.453505 | 0.989596 | 0.327552 | 0.966676 | -4.59647 |
| ITGAX   | NM_000887.3    | 0     | -0.36772 | 9.221799 | -0.98941 | 0.327644 | 0.966676 | -4.59648 |
| LY86    | NM_004271.3    | 0     | -0.3462  | 7.747927 | -0.98918 | 0.327756 | 0.966676 | -4.59649 |
| FCGR2A  | NM_021642.3    | 0     | -0.48083 | 10.11777 | -0.9791  | 0.332656 | 0.966676 | -4.59703 |
| CDKN1A  | NM_000389.2    | 0     | -0.31305 | 9.021987 | -0.979   | 0.332703 | 0.966676 | -4.59704 |
| TFEB    | NM_007162.2    | 0.014 | -0.48768 | 5.550239 | -0.97762 | 0.333378 | 0.966676 | -4.59711 |
| CXCL3   | NM_002090.2    | 0.267 | 1.29938  | 3.780252 | 0.975061 | 0.334633 | 0.966676 | -4.59725 |
| IL2RG   | NM_000206.1    | 0     | 0.340539 | 8.710508 | 0.974496 | 0.33491  | 0.966676 | -4.59728 |
| IRF5    | NM_002200.3    | 0     | -0.29627 | 6.435055 | -0.9657  | 0.339245 | 0.966676 | -4.59774 |
| CASP8   | NM_001228.4    | 0     | -0.38002 | 9.094482 | -0.96458 | 0.339801 | 0.966676 | -4.5978  |
| MR1     | NM_001531.2    | 0.062 | -0.62679 | 3.474107 | -0.96319 | 0.340494 | 0.966676 | -4.59788 |
| LTBR    | NM_002342.1    | 0.007 | -0.45403 | 6.427198 | -0.95889 | 0.342632 | 0.966676 | -4.5981  |
| CCR2    | NM_001123041.2 | 0.175 | 0.878435 | 3.386746 | 0.95629  | 0.343928 | 0.966676 | -4.59824 |
| CARD9   | NM_052813.4    | 0.089 | -0.6378  | 4.147282 | -0.95208 | 0.346037 | 0.966676 | -4.59846 |
| BTK     | NM_000061.1    | 0     | 0.224839 | 6.784176 | 0.949364 | 0.3474   | 0.966676 | -4.5986  |
| S100A12 | NM_005621.1    | 0     | 0.440536 | 10.56909 | 0.949057 | 0.347554 | 0.966676 | -4.59861 |
| ITGA6   | NM_000210.1    | 0.062 | 0.53556  | 4.602096 | 0.947642 | 0.348267 | 0.966676 | -4.59869 |
| KLRC2   | NM_002260.3    | 0.134 | -0.76327 | 4.132589 | -0.94674 | 0.348722 | 0.966676 | -4.59873 |
| CD27    | NM_001242.4    | 0.031 | 0.6659   | 5.179405 | 0.945609 | 0.349292 | 0.966676 | -4.59879 |
| SPN     | NM_003123.3    | 0.017 | 0.557062 | 5.348767 | 0.94298  | 0.350621 | 0.966676 | -4.59893 |
| MAF     | NM_005360.4    | 0.021 | 0.643818 | 5.119079 | 0.934709 | 0.354822 | 0.966676 | -4.59935 |
| EP300   | NM_001429.2    | 0     | -0.26477 | 8.483865 | -0.93229 | 0.356056 | 0.966676 | -4.59948 |
| IKBKG   | NM_003639.2    | 0.003 | -0.2412  | 6.422169 | -0.93084 | 0.356802 | 0.966676 | -4.59955 |
| PLAU    | NM_002658.2    | 0.226 | -1.30662 | 4.97886  | -0.92027 | 0.362233 | 0.966676 | -4.60009 |
| SLAMF7  | NM_021181.3    | 0     | 0.4606   | 6.25628  | 0.919761 | 0.362499 | 0.966676 | -4.60011 |

|           |                |       |          |          |          |          |          |          |
|-----------|----------------|-------|----------|----------|----------|----------|----------|----------|
| PSEN1     | NM_000021.2    | 0     | -0.23402 | 6.561164 | -0.91909 | 0.362847 | 0.966676 | -4.60015 |
| JAK1      | NM_002227.1    | 0     | -0.19057 | 9.217217 | -0.91401 | 0.365479 | 0.966676 | -4.6004  |
| CCL4      | NM_002984.2    | 0     | -0.47725 | 7.54716  | -0.90999 | 0.367577 | 0.966676 | -4.6006  |
| IL4R      | NM_000418.2    | 0     | -0.41843 | 7.584634 | -0.9076  | 0.368823 | 0.966676 | -4.60072 |
| TIGIT     | NM_173799.2    | 0.096 | 0.672945 | 3.37671  | 0.907141 | 0.369063 | 0.966676 | -4.60074 |
| LILRA1    | NM_006863.1    | 0.038 | 0.549535 | 5.268155 | 0.903658 | 0.370888 | 0.966676 | -4.60092 |
| GZMH      | NM_033423.3    | 0.007 | 0.612791 | 8.19661  | 0.886928 | 0.379734 | 0.967393 | -4.60174 |
| MAPKAPK2  | NM_004759.3    | 0     | -0.3165  | 8.36488  | -0.88651 | 0.379955 | 0.967393 | -4.60176 |
| LILRB1    | NM_001081637.1 | 0.007 | 0.551154 | 6.376977 | 0.873022 | 0.387189 | 0.967393 | -4.60241 |
| MAPK3     | NM_001040056.1 | 0     | -0.26676 | 6.620495 | -0.87176 | 0.38787  | 0.967393 | -4.60247 |
| IFNG      | NM_000619.2    | 0.007 | 0.501867 | 6.698489 | 0.862662 | 0.392802 | 0.967393 | -4.60291 |
| IL6ST     | NM_002184.2    | 0     | -0.27123 | 8.370773 | -0.85426 | 0.397391 | 0.967393 | -4.6033  |
| TXK       | NM_003328.1    | 0.202 | -0.58429 | 3.152687 | -0.85365 | 0.397727 | 0.967393 | -4.60333 |
| CCL20     | NM_004591.1    | 0.411 | -0.78081 | 2.384007 | -0.85328 | 0.397929 | 0.967393 | -4.60335 |
| MAP3K1    | NM_005921.1    | 0     | -0.20026 | 8.05806  | -0.84916 | 0.400195 | 0.967393 | -4.60354 |
| HLA-A     | NM_002116.5    | 0     | -0.20606 | 13.41276 | -0.84652 | 0.401646 | 0.967393 | -4.60367 |
| CCR4      | NM_005508.4    | 0.062 | -0.60262 | 4.255131 | -0.84616 | 0.401846 | 0.967393 | -4.60368 |
| TNFRSF10B | NM_003842.3    | 0.014 | -0.3557  | 5.755992 | -0.83729 | 0.406763 | 0.967393 | -4.60409 |
| HLA-DPA1  | NM_033554.2    | 0     | 0.274373 | 10.19163 | 0.835104 | 0.407978 | 0.967393 | -4.60419 |
| TARP      | NM_001003799.1 | 0.003 | 0.433794 | 6.786451 | 0.834963 | 0.408057 | 0.967393 | -4.6042  |
| PIN1      | NM_006221.2    | 0     | 0.205641 | 6.481329 | 0.826965 | 0.412529 | 0.967393 | -4.60457 |
| PSEN2     | NM_000447.2    | 0.058 | -0.49675 | 3.563695 | -0.8215  | 0.4156   | 0.967393 | -4.60482 |
| CXCL2     | NM_002089.3    | 0.058 | 0.816366 | 6.548646 | 0.820867 | 0.415959 | 0.967393 | -4.60485 |
| C2        | NM_000063.3    | 0.243 | 0.753681 | 2.476793 | 0.819284 | 0.416852 | 0.967393 | -4.60492 |
| KLRD1     | NM_002262.3    | 0.014 | 0.606022 | 6.740085 | 0.81847  | 0.417312 | 0.967393 | -4.60495 |
| CD24      | NM_013230.2    | 0.007 | -0.53807 | 5.739555 | -0.81466 | 0.419465 | 0.967393 | -4.60512 |
| IRAK1     | NM_001569.3    | 0     | -0.20676 | 7.154834 | -0.81298 | 0.42042  | 0.967393 | -4.6052  |
| HLA-G     | NM_002127.4    | 0     | -0.28118 | 7.116824 | -0.81139 | 0.421325 | 0.967393 | -4.60527 |
| BCL6      | NM_001706.2    | 0     | -0.38129 | 9.634073 | -0.81042 | 0.421874 | 0.967393 | -4.60532 |
| FOXJ1     | NM_001454.3    | 0     | 0.359681 | 5.445389 | 0.81002  | 0.422102 | 0.967393 | -4.60533 |

|           |                |       |          |          |          |          |          |          |
|-----------|----------------|-------|----------|----------|----------|----------|----------|----------|
| ANP32B    | NM_006401.2    | 0     | 0.288929 | 8.323172 | 0.803697 | 0.425708 | 0.967393 | -4.60562 |
| NCAM1     | NM_000615.5    | 0.017 | -0.43682 | 4.399241 | -0.80312 | 0.426036 | 0.967393 | -4.60564 |
| IL8       | NM_000584.2    | 0     | -0.51918 | 13.63443 | -0.8004  | 0.427596 | 0.967393 | -4.60576 |
| TRAF2     | NM_021138.3    | 0.048 | 0.460446 | 3.805718 | 0.786482 | 0.435621 | 0.967393 | -4.60637 |
| TNFRSF10C | NM_003841.3    | 0.106 | -0.70204 | 5.932921 | -0.78223 | 0.43809  | 0.967393 | -4.60656 |
| POU2F2    | NM_002698.2    | 0.003 | 0.248341 | 6.763863 | 0.781512 | 0.438508 | 0.967393 | -4.60659 |
| ABCB1     | NM_000927.3    | 0.092 | -0.43062 | 4.00911  | -0.77937 | 0.439759 | 0.967393 | -4.60668 |
| TIRAP     | NM_148910.2    | 0.144 | 0.615686 | 2.708772 | 0.778528 | 0.440247 | 0.967393 | -4.60672 |
| KLRC1     | NM_002259.3    | 0.079 | -0.5704  | 4.543482 | -0.77549 | 0.442024 | 0.967393 | -4.60685 |
| CD70      | NM_001252.2    | 0.346 | 0.589957 | 1.72365  | 0.768617 | 0.446052 | 0.967393 | -4.60714 |
| MEFV      | NM_000243.2    | 0.003 | -0.42497 | 7.438844 | -0.76832 | 0.446224 | 0.967393 | -4.60715 |
| C3AR1     | NM_004054.2    | 0.147 | 0.704398 | 4.120067 | 0.766152 | 0.447502 | 0.967393 | -4.60725 |
| ALCAM     | NM_001627.3    | 0.048 | -0.43967 | 4.039628 | -0.76475 | 0.448328 | 0.967393 | -4.6073  |
| LAMP1     | NM_005561.3    | 0     | 0.162194 | 8.732198 | 0.761379 | 0.450319 | 0.967393 | -4.60745 |
| LY9       | NM_001033667.1 | 0     | 0.273601 | 6.85593  | 0.75754  | 0.452592 | 0.967393 | -4.60761 |
| CD81      | NM_004356.3    | 0     | 0.238954 | 8.858433 | 0.75754  | 0.452592 | 0.967393 | -4.60761 |
| CTLA4     | NM_005214.3    | 0.01  | 0.441818 | 5.919118 | 0.753899 | 0.454754 | 0.967393 | -4.60776 |
| MAP2K2    | NM_030662.2    | 0     | 0.192116 | 8.313204 | 0.753493 | 0.454996 | 0.967393 | -4.60778 |
| SMAD2     | NM_005901.5    | 0     | 0.212659 | 6.606409 | 0.743581 | 0.460913 | 0.967393 | -4.60819 |
| IFIT1     | NM_001548.3    | 0.079 | -0.65407 | 4.978397 | -0.74305 | 0.461234 | 0.967393 | -4.60821 |
| CD84      | NM_001184879.1 | 0     | -0.21508 | 6.851062 | -0.72924 | 0.469556 | 0.967393 | -4.60878 |
| CD244     | NM_016382.2    | 0.017 | 0.461241 | 5.927828 | 0.728625 | 0.469927 | 0.967393 | -4.6088  |
| CD4       | NM_000616.4    | 0     | 0.232629 | 7.707342 | 0.727868 | 0.470386 | 0.967393 | -4.60883 |
| ICAM4     | NM_001039132.1 | 0.068 | -0.54172 | 4.095334 | -0.727   | 0.470911 | 0.967393 | -4.60887 |
| FOS       | NM_005252.2    | 0     | -0.29111 | 13.08453 | -0.72556 | 0.471789 | 0.967393 | -4.60892 |
| TLR5      | NM_003268.3    | 0.202 | -0.62005 | 3.397969 | -0.72356 | 0.473003 | 0.967393 | -4.60901 |
| ISG20     | NM_002201.4    | 0     | -0.26048 | 7.953218 | -0.72204 | 0.473929 | 0.967393 | -4.60907 |
| MIF       | NM_002415.1    | 0     | 0.232805 | 8.051564 | 0.713908 | 0.478893 | 0.967393 | -4.60939 |
| RELB      | NM_006509.2    | 0     | -0.29434 | 6.880603 | -0.70781 | 0.482636 | 0.967393 | -4.60963 |
| RIPK2     | NM_003821.5    | 0     | -0.28137 | 8.631872 | -0.69767 | 0.488897 | 0.967393 | -4.61003 |

|          |                |       |          |          |          |          |          |          |
|----------|----------------|-------|----------|----------|----------|----------|----------|----------|
| LGALS3   | NM_001177388.1 | 0     | 0.301185 | 9.422522 | 0.696755 | 0.489465 | 0.967393 | -4.61006 |
| IRF7     | NM_001572.3    | 0     | -0.28845 | 7.693078 | -0.69654 | 0.489596 | 0.967393 | -4.61007 |
| SBNO2    | NM_014963.2    | 0.003 | -0.30674 | 6.650402 | -0.69241 | 0.49216  | 0.967393 | -4.61023 |
| LILRB2   | NM_005874.1    | 0     | -0.26248 | 7.717561 | -0.69024 | 0.493512 | 0.967393 | -4.61031 |
| LCK      | NM_005356.2    | 0.003 | 0.422361 | 7.504193 | 0.688536 | 0.494576 | 0.967393 | -4.61038 |
| LILRA5   | NM_181879.2    | 0     | -0.31734 | 9.380127 | -0.68539 | 0.496537 | 0.967393 | -4.6105  |
| HAVCR2   | NM_032782.3    | 0.014 | 0.281889 | 5.163379 | 0.678973 | 0.500559 | 0.967393 | -4.61074 |
| TNFRSF18 | NM_004195.2    | 0.247 | 0.524385 | 2.462623 | 0.677665 | 0.501381 | 0.967393 | -4.61079 |
| PVR      | NM_006505.3    | 0.182 | 0.532449 | 2.690121 | 0.677455 | 0.501513 | 0.967393 | -4.6108  |
| GPI      | NM_000175.2    | 0     | 0.157075 | 7.703165 | 0.674846 | 0.503154 | 0.967393 | -4.6109  |
| C1QBP    | NM_001212.3    | 0     | 0.224017 | 7.333467 | 0.656212 | 0.514959 | 0.967393 | -4.61159 |
| TFRC     | NM_003234.1    | 0     | 0.272634 | 7.865515 | 0.655594 | 0.515353 | 0.967393 | -4.61161 |
| TNFRSF9  | NM_001561.4    | 0.329 | -0.44476 | 1.979191 | -0.65516 | 0.515632 | 0.967393 | -4.61163 |
| RPS6     | NM_001010.2    | 0     | 0.203349 | 12.83735 | 0.65341  | 0.516747 | 0.967393 | -4.61169 |
| CTSS     | NM_004079.3    | 0     | 0.165846 | 12.63254 | 0.651644 | 0.517876 | 0.967393 | -4.61176 |
| PIK3CD   | NM_005026.3    | 0     | -0.32411 | 7.383324 | -0.64993 | 0.518973 | 0.967393 | -4.61182 |
| TNFRSF14 | NM_003820.2    | 0     | 0.145319 | 7.563062 | 0.64914  | 0.519478 | 0.967393 | -4.61185 |
| TP53     | NM_000546.2    | 0.014 | 0.332852 | 5.297269 | 0.64882  | 0.519683 | 0.967393 | -4.61186 |
| CD47     | NM_001777.3    | 0     | 0.11663  | 8.848972 | 0.648048 | 0.520178 | 0.967393 | -4.61189 |
| ITGAL    | NM_002209.2    | 0     | 0.196582 | 8.422515 | 0.645903 | 0.521553 | 0.967393 | -4.61196 |
| CD58     | NM_001779.2    | 0     | 0.180404 | 7.654274 | 0.642841 | 0.523521 | 0.967393 | -4.61207 |
| IRF8     | NM_002163.2    | 0     | -0.20838 | 7.368256 | -0.63916 | 0.525889 | 0.967393 | -4.61221 |
| CD48     | NM_001778.2    | 0     | 0.183748 | 10.51527 | 0.636883 | 0.52736  | 0.967393 | -4.61229 |
| MEF2C    | NM_002397.3    | 0.01  | 0.40749  | 6.144537 | 0.636784 | 0.527424 | 0.967393 | -4.61229 |
| LRP1     | NM_002332.2    | 0     | -0.2235  | 7.384461 | -0.63488 | 0.528655 | 0.967393 | -4.61236 |
| IL6R     | NM_000565.2    | 0     | -0.22617 | 6.601497 | -0.62938 | 0.532217 | 0.967393 | -4.61255 |
| CASP1    | NM_001223.3    | 0     | 0.22689  | 8.0139   | 0.627706 | 0.533303 | 0.967393 | -4.61261 |
| TNFSF10  | NM_003810.2    | 0     | 0.335017 | 7.566405 | 0.625915 | 0.534466 | 0.967393 | -4.61267 |
| STAT5B   | NM_012448.3    | 0     | -0.27783 | 7.056284 | -0.62011 | 0.538247 | 0.967393 | -4.61288 |
| MICA     | NM_000247.1    | 0.178 | -0.4806  | 2.855832 | -0.61946 | 0.538674 | 0.967393 | -4.6129  |

|          |                |       |          |          |          |          |          |          |
|----------|----------------|-------|----------|----------|----------|----------|----------|----------|
| ATG16L1  | NM_198890.2    | 0.007 | 0.228282 | 5.810312 | 0.609585 | 0.545138 | 0.967393 | -4.61324 |
| IL32     | NM_001012633.1 | 0     | 0.242986 | 11.05665 | 0.603698 | 0.549012 | 0.967393 | -4.61344 |
| CSF1     | NM_000757.4    | 0.236 | -0.52165 | 3.534624 | -0.59524 | 0.554605 | 0.967393 | -4.61372 |
| UBC      | NM_021009.3    | 0     | -0.16844 | 14.13579 | -0.59165 | 0.556983 | 0.967393 | -4.61384 |
| CD3D     | NM_000732.4    | 0.003 | 0.397062 | 8.20291  | 0.590872 | 0.557501 | 0.967393 | -4.61387 |
| ENTPD1   | NM_001098175.1 | 0.092 | -0.42872 | 4.032419 | -0.59031 | 0.557876 | 0.967393 | -4.61388 |
| MERTK    | NM_006343.2    | 0.171 | 0.503313 | 2.777205 | 0.589604 | 0.558343 | 0.967393 | -4.61391 |
| F13A1    | NM_000129.3    | 0     | -0.34559 | 9.711828 | -0.58475 | 0.561577 | 0.967393 | -4.61407 |
| TLR4     | NM_138554.2    | 0.003 | -0.26    | 6.848706 | -0.57632 | 0.567212 | 0.967393 | -4.61434 |
| PSMD7    | NM_002811.3    | 0     | -0.12736 | 8.416579 | -0.57547 | 0.567782 | 0.967393 | -4.61437 |
| NFATC3   | NM_004555.2    | 0     | 0.166116 | 6.823623 | 0.572643 | 0.569677 | 0.967393 | -4.61446 |
| AMICA1   | NM_153206.2    | 0     | 0.25202  | 9.092276 | 0.571893 | 0.570181 | 0.967393 | -4.61448 |
| PNMA1    | NM_006029.4    | 0     | -0.22958 | 5.394446 | -0.57125 | 0.57061  | 0.967393 | -4.6145  |
| BID      | NM_001196.2    | 0.038 | -0.22157 | 5.321876 | -0.56452 | 0.575143 | 0.967393 | -4.61472 |
| ATG7     | NM_001136031.2 | 0.014 | 0.274431 | 5.794977 | 0.563732 | 0.575676 | 0.967393 | -4.61474 |
| CXCR1    | NM_000634.2    | 0.38  | -0.54958 | 2.902891 | -0.56238 | 0.57659  | 0.967393 | -4.61479 |
| CD59     | NM_000611.4    | 0     | -0.28776 | 6.155392 | -0.55579 | 0.58105  | 0.967393 | -4.61499 |
| MAP3K5   | NM_005923.3    | 0     | -0.15917 | 7.690549 | -0.55398 | 0.582277 | 0.967393 | -4.61505 |
| PLAUR    | NM_001005376.1 | 0     | -0.2403  | 9.602724 | -0.54846 | 0.586031 | 0.967393 | -4.61522 |
| TNFRSF8  | NM_152942.2    | 0.373 | 0.413585 | 1.852716 | 0.548235 | 0.586183 | 0.967393 | -4.61523 |
| HLA-DQA1 | NM_002122.3    | 0.325 | 0.751875 | 5.461318 | 0.547373 | 0.586771 | 0.967393 | -4.61525 |
| ITGAE    | NM_002208.4    | 0     | -0.16028 | 6.65954  | -0.54437 | 0.588818 | 0.967393 | -4.61534 |
| CSF2RB   | NM_000395.2    | 0     | -0.2465  | 8.902947 | -0.54156 | 0.590738 | 0.967393 | -4.61543 |
| ICAM2    | NM_000873.3    | 0     | -0.20871 | 6.481238 | -0.53975 | 0.591973 | 0.967393 | -4.61548 |
| ICOS     | NM_012092.2    | 0.048 | 0.333173 | 5.329691 | 0.534686 | 0.595444 | 0.967393 | -4.61564 |
| SLAMF1   | NM_003037.2    | 0.205 | -0.44393 | 2.548404 | -0.52889 | 0.599426 | 0.967393 | -4.61581 |
| HMGB1    | NM_002128.4    | 0     | -0.10748 | 9.282678 | -0.52791 | 0.600098 | 0.967393 | -4.61584 |
| STAT2    | NM_005419.2    | 0     | 0.253285 | 7.744843 | 0.524494 | 0.602455 | 0.967393 | -4.61594 |
| BST2     | NM_004335.2    | 0     | 0.205799 | 6.957766 | 0.524237 | 0.602632 | 0.967393 | -4.61595 |
| KIR3DL2  | NM_006737.2    | 0.253 | 0.364515 | 2.403673 | 0.522529 | 0.603811 | 0.967393 | -4.616   |

|        |                |       |          |          |          |          |          |          |
|--------|----------------|-------|----------|----------|----------|----------|----------|----------|
| CD46   | NM_172350.1    | 0     | 0.111207 | 8.867534 | 0.521569 | 0.604475 | 0.967393 | -4.61603 |
| FCGR1A | NM_000566.3    | 0.202 | -0.40914 | 2.641645 | -0.51393 | 0.609763 | 0.967393 | -4.61625 |
| YTHDF2 | NM_001172828.1 | 0.01  | -0.1339  | 5.948496 | -0.5128  | 0.610547 | 0.967393 | -4.61628 |
| EGR2   | NM_000399.3    | 0.164 | 0.574684 | 3.749044 | 0.503815 | 0.616797 | 0.967393 | -4.61654 |
| CREB1  | NM_004379.3    | 0     | 0.172408 | 5.941505 | 0.498154 | 0.620751 | 0.967393 | -4.6167  |
| INPP5D | NM_005541.3    | 0     | 0.140262 | 7.652128 | 0.495993 | 0.622262 | 0.967393 | -4.61676 |
| BCL2L1 | NM_001191.2    | 0     | 0.383814 | 8.045029 | 0.488808 | 0.627301 | 0.967393 | -4.61696 |
| NFATC2 | NM_012340.3    | 0     | 0.143065 | 7.295299 | 0.486158 | 0.629165 | 0.967393 | -4.61703 |
| CXCR5  | NM_001716.3    | 0.171 | 0.408885 | 3.160619 | 0.48381  | 0.630818 | 0.967393 | -4.61709 |
| CD63   | NM_001780.4    | 0     | -0.15499 | 9.814142 | -0.48347 | 0.631057 | 0.967393 | -4.6171  |
| RUNX3  | NM_004350.1    | 0     | -0.17804 | 8.801292 | -0.482   | 0.632091 | 0.967393 | -4.61714 |
| MAVS   | NM_020746.3    | 0.031 | 0.236618 | 4.531542 | 0.477461 | 0.635297 | 0.967393 | -4.61726 |
| SELPLG | NM_001206609.1 | 0     | 0.230977 | 7.208536 | 0.476791 | 0.63577  | 0.967393 | -4.61728 |
| LTB    | NM_002341.1    | 0     | -0.23939 | 9.575613 | -0.47513 | 0.636946 | 0.967393 | -4.61733 |
| NCF4   | NM_000631.4    | 0     | -0.20831 | 7.708288 | -0.475   | 0.637038 | 0.967393 | -4.61733 |
| TBX21  | NM_013351.1    | 0.007 | 0.255463 | 6.903745 | 0.474249 | 0.637568 | 0.967393 | -4.61735 |
| HCK    | NM_002110.2    | 0     | -0.20149 | 9.204422 | -0.47344 | 0.638138 | 0.967393 | -4.61737 |
| ISG15  | NM_005101.3    | 0     | 0.302912 | 7.06732  | 0.472332 | 0.638924 | 0.967393 | -4.6174  |
| NUP107 | NM_020401.2    | 0.003 | 0.127423 | 5.270172 | 0.467563 | 0.642306 | 0.967393 | -4.61753 |
| ETS1   | NM_005238.3    | 0     | 0.193647 | 9.049235 | 0.466834 | 0.642824 | 0.967393 | -4.61755 |
| KLRB1  | NM_002258.2    | 0.007 | -0.30415 | 7.841228 | -0.4662  | 0.643275 | 0.967393 | -4.61756 |
| ITGB1  | NM_033666.2    | 0     | 0.127123 | 9.265407 | 0.45692  | 0.64988  | 0.967393 | -4.6178  |
| CD68   | NM_001251.2    | 0     | -0.14099 | 9.592528 | -0.4528  | 0.652826 | 0.967393 | -4.61791 |
| OAS3   | NM_006187.2    | 0.024 | 0.36165  | 5.89985  | 0.442425 | 0.660257 | 0.967393 | -4.61817 |
| HLA-C  | NM_002117.4    | 0     | -0.11438 | 12.5779  | -0.43943 | 0.66241  | 0.967393 | -4.61824 |
| PAX5   | NM_016734.1    | 0.178 | 0.318128 | 3.936745 | 0.437596 | 0.663729 | 0.967393 | -4.61829 |
| FCER1A | NM_002001.2    | 0.12  | 0.433732 | 4.747797 | 0.434108 | 0.666241 | 0.967393 | -4.61838 |
| CXCL1  | NM_001511.1    | 0.144 | 0.408447 | 5.006703 | 0.431942 | 0.667803 | 0.967393 | -4.61843 |
| IGF2R  | NM_000876.1    | 0.003 | -0.14573 | 7.211368 | -0.42513 | 0.672727 | 0.967393 | -4.61859 |
| GZMB   | NM_004131.3    | 0.003 | 0.269532 | 8.562487 | 0.412257 | 0.682067 | 0.967393 | -4.6189  |



|                           |                |       |          |          |          |          |          |          |
|---------------------------|----------------|-------|----------|----------|----------|----------|----------|----------|
| EWSR1                     | NM_013986.3    | 0     | -0.07634 | 8.259702 | -0.40882 | 0.684567 | 0.967393 | -4.61898 |
| ENG                       | NM_001114753.1 | 0.051 | -0.28662 | 4.250448 | -0.40719 | 0.685757 | 0.967393 | -4.61901 |
| CD6                       | NM_006725.3    | 0.014 | 0.246242 | 6.224248 | 0.40426  | 0.687896 | 0.967393 | -4.61908 |
| KIR_Activating_Subgroup_1 | NM_001083539.1 | 0.469 | -0.3743  | 1.765709 | -0.40275 | 0.689002 | 0.967393 | -4.61912 |
| IKBKE                     | NM_014002.2    | 0.027 | 0.250712 | 5.332283 | 0.401849 | 0.689657 | 0.967393 | -4.61914 |
| IL7R                      | NM_002185.2    | 0.01  | -0.26854 | 7.403287 | -0.40152 | 0.689897 | 0.967393 | -4.61914 |
| TNFRSF13B                 | NM_012452.2    | 0.418 | -0.32932 | 1.560851 | -0.4014  | 0.689987 | 0.967393 | -4.61915 |
| IL18R1                    | NM_003855.2    | 0.106 | -0.34549 | 4.143967 | -0.40069 | 0.690504 | 0.967393 | -4.61916 |
| CCL3                      | NM_002983.2    | 0     | -0.15976 | 9.132729 | -0.39926 | 0.691548 | 0.967393 | -4.61919 |
| PSMB7                     | NM_002799.2    | 0     | 0.095609 | 8.640348 | 0.399196 | 0.691598 | 0.967393 | -4.6192  |
| IFIT2                     | NM_001547.4    | 0.003 | -0.31851 | 7.040508 | -0.39819 | 0.692331 | 0.967393 | -4.61922 |
| LTA                       | NM_000595.2    | 0.017 | -0.2547  | 5.278901 | -0.3954  | 0.694375 | 0.967393 | -4.61928 |
| CR1                       | NM_000651.4    | 0     | 0.205025 | 8.329865 | 0.394    | 0.695403 | 0.967393 | -4.61931 |
| ILF3                      | NM_001137673.1 | 0     | -0.09246 | 8.590258 | -0.38968 | 0.698576 | 0.967393 | -4.61941 |
| STAT4                     | NM_003151.2    | 0.003 | 0.162436 | 6.278248 | 0.388836 | 0.699193 | 0.967393 | -4.61943 |
| IL15RA                    | NM_002189.2    | 0     | 0.160847 | 5.63609  | 0.386611 | 0.700828 | 0.967393 | -4.61947 |
| CXCR3                     | NM_001504.1    | 0.11  | -0.28016 | 3.352525 | -0.38583 | 0.701401 | 0.967393 | -4.61949 |
| MAPK1                     | NM_138957.2    | 0     | 0.114649 | 8.055641 | 0.384541 | 0.702351 | 0.967393 | -4.61952 |
| ATF2                      | NM_001256090.1 | 0     | -0.08603 | 6.400367 | -0.38048 | 0.705341 | 0.967393 | -4.61961 |
| KIR_Inhibiting_Subgroup_2 | NM_014511.3    | 0.466 | 0.25989  | 1.661611 | 0.376738 | 0.708101 | 0.967393 | -4.61969 |
| CD1D                      | NM_001766.3    | 0     | 0.133765 | 6.577481 | 0.373378 | 0.710583 | 0.967393 | -4.61976 |
| SERPINB2                  | NM_002575.1    | 0.075 | 0.361435 | 5.698605 | 0.373074 | 0.710808 | 0.967393 | -4.61976 |
| ITGAM                     | NM_000632.3    | 0     | 0.133471 | 8.134644 | 0.372464 | 0.711259 | 0.967393 | -4.61978 |
| CARD11                    | NM_032415.2    | 0     | 0.152785 | 6.802    | 0.363369 | 0.717995 | 0.967393 | -4.61997 |
| HLA-DMA                   | NM_006120.3    | 0     | 0.104734 | 8.465897 | 0.361499 | 0.719383 | 0.967393 | -4.62    |
| ABL1                      | NM_005157.3    | 0.014 | -0.14492 | 4.655954 | -0.35403 | 0.724937 | 0.967393 | -4.62016 |
| DPP4                      | NM_001935.3    | 0.366 | -0.29449 | 1.607852 | -0.35324 | 0.72552  | 0.967393 | -4.62017 |
| IL17RA                    | NM_014339.6    | 0.003 | -0.13776 | 7.20004  | -0.34789 | 0.729512 | 0.967393 | -4.62028 |
| CD160                     | NM_007053.2    | 0.171 | -0.30584 | 3.628464 | -0.34578 | 0.731086 | 0.967393 | -4.62032 |
| RORA                      | NM_134261.2    | 0.003 | 0.170553 | 6.734638 | 0.340303 | 0.735179 | 0.967393 | -4.62042 |

|                           |                |       |          |          |          |          |          |          |
|---------------------------|----------------|-------|----------|----------|----------|----------|----------|----------|
| CD55                      | NM_000574.3    | 0.264 | -0.30758 | 3.129697 | -0.33935 | 0.735893 | 0.967393 | -4.62044 |
| MAP2K1                    | NM_002755.2    | 0     | 0.108515 | 7.380962 | 0.339301 | 0.735928 | 0.967393 | -4.62044 |
| SLAMF6                    | NM_001184714.1 | 0.267 | 0.29427  | 2.349106 | 0.33906  | 0.736109 | 0.967393 | -4.62045 |
| POU2AF1                   | NM_006235.2    | 0.455 | 0.319944 | 1.810931 | 0.338995 | 0.736157 | 0.967393 | -4.62045 |
| TANK                      | NM_004180.2    | 0     | -0.09819 | 8.706135 | -0.33565 | 0.738661 | 0.967393 | -4.62051 |
| CXCL5                     | NM_002994.3    | 0.027 | -0.24468 | 5.848684 | -0.33334 | 0.740394 | 0.967393 | -4.62056 |
| JAM3                      | NM_032801.3    | 0.027 | -0.26587 | 5.043229 | -0.33068 | 0.74239  | 0.967393 | -4.62061 |
| TNFSF12                   | NM_003809.2    | 0     | -0.13043 | 7.372529 | -0.321   | 0.749667 | 0.967393 | -4.62079 |
| IFNAR2                    | NM_000874.3    | 0     | -0.07641 | 8.322536 | -0.3182  | 0.751771 | 0.967393 | -4.62084 |
| CCR6                      | NM_031409.2    | 0.301 | -0.25579 | 1.833526 | -0.3154  | 0.753883 | 0.967393 | -4.62089 |
| TNFSF8                    | NM_001244.3    | 0.007 | -0.11452 | 5.552587 | -0.31499 | 0.754193 | 0.967393 | -4.62089 |
| PPBP                      | NM_002704.2    | 0     | -0.2021  | 11.92664 | -0.31447 | 0.754584 | 0.967393 | -4.6209  |
| SIGLEC1                   | NM_023068.3    | 0.182 | -0.38739 | 3.727891 | -0.31301 | 0.755689 | 0.967393 | -4.62093 |
| KIR_Inhibiting_Subgroup_1 | NM_014218.2    | 0.243 | 0.220761 | 2.758276 | 0.31085  | 0.75732  | 0.967393 | -4.62097 |
| CTSW                      | NM_001335.3    | 0.003 | 0.159823 | 7.545881 | 0.309402 | 0.758414 | 0.967393 | -4.62099 |
| LAG3                      | NM_002286.5    | 0.065 | 0.258618 | 4.236761 | 0.307129 | 0.760132 | 0.967393 | -4.62103 |
| KIR_Activating_Subgroup_2 | NM_014512.1    | 0.349 | -0.25516 | 2.183157 | -0.30643 | 0.760658 | 0.967393 | -4.62104 |
| FCER1G                    | NM_004106.1    | 0     | 0.121139 | 10.81787 | 0.30136  | 0.764499 | 0.967393 | -4.62113 |
| PRKCD                     | NM_006254.3    | 0     | -0.10259 | 8.930837 | -0.299   | 0.766284 | 0.967393 | -4.62117 |
| CD33                      | NM_001177608.1 | 0.024 | 0.174417 | 5.292569 | 0.29865  | 0.766553 | 0.967393 | -4.62118 |
| CMKLR1                    | NM_004072.1    | 0.301 | -0.30325 | 2.694735 | -0.2986  | 0.766588 | 0.967393 | -4.62118 |
| CCR1                      | NM_001295.2    | 0.007 | 0.167999 | 6.124604 | 0.295516 | 0.768931 | 0.967393 | -4.62123 |
| NT5E                      | NM_002526.2    | 0.137 | -0.24341 | 2.662419 | -0.29303 | 0.770815 | 0.967393 | -4.62127 |
| MAP2K4                    | NM_003010.2    | 0.171 | -0.24983 | 2.984437 | -0.2929  | 0.77092  | 0.967393 | -4.62127 |
| CHUK                      | NM_001278.3    | 0     | 0.107873 | 6.830635 | 0.292442 | 0.771265 | 0.967393 | -4.62128 |
| RUNX1                     | NM_001754.4    | 0     | -0.09456 | 6.466619 | -0.29197 | 0.771625 | 0.967393 | -4.62129 |
| PTPRC                     | NM_080921.3    | 0     | 0.117816 | 9.185927 | 0.291099 | 0.772285 | 0.967393 | -4.6213  |
| NCR1                      | NM_004829.5    | 0.017 | 0.158447 | 5.448008 | 0.290052 | 0.773081 | 0.967393 | -4.62132 |
| TAPBP                     | NM_003190.4    | 0     | -0.07422 | 9.897147 | -0.28275 | 0.778638 | 0.967393 | -4.62144 |
| HLA-DMB                   | NM_002118.3    | 0     | 0.108724 | 8.249254 | 0.281031 | 0.779948 | 0.967393 | -4.62147 |

|          |                |       |          |          |          |          |          |          |
|----------|----------------|-------|----------|----------|----------|----------|----------|----------|
| CD8A     | NM_001768.5    | 0     | 0.153085 | 7.690719 | 0.275703 | 0.784012 | 0.967393 | -4.62155 |
| CD83     | NM_004233.3    | 0     | -0.10978 | 10.37966 | -0.27319 | 0.785929 | 0.967393 | -4.62159 |
| CD3E     | NM_000733.2    | 0.003 | 0.174586 | 7.823806 | 0.273186 | 0.785934 | 0.967393 | -4.62159 |
| LAMP2    | NM_001122606.1 | 0     | -0.06591 | 7.404305 | -0.27309 | 0.786005 | 0.967393 | -4.62159 |
| IFITM1   | NM_003641.3    | 0     | 0.123775 | 10.37725 | 0.271781 | 0.787007 | 0.967393 | -4.62161 |
| TBK1     | NM_013254.2    | 0     | 0.073406 | 6.159074 | 0.2715   | 0.787222 | 0.967393 | -4.62161 |
| TLR6     | NM_006068.2    | 0.024 | -0.12093 | 5.028522 | -0.27083 | 0.787734 | 0.967393 | -4.62162 |
| CTSH     | NM_004390.3    | 0     | 0.09014  | 8.71091  | 0.266343 | 0.791166 | 0.969179 | -4.62169 |
| PECAM1   | NM_000442.3    | 0     | 0.064745 | 9.131581 | 0.263355 | 0.793453 | 0.969557 | -4.62174 |
| NOD2     | NM_022162.1    | 0     | -0.08608 | 6.654154 | -0.25182 | 0.802299 | 0.970836 | -4.62191 |
| MAPK8    | NM_002750.2    | 0.017 | -0.12358 | 4.369522 | -0.24998 | 0.80372  | 0.970836 | -4.62193 |
| TNFSF13B | NM_006573.4    | 0.003 | 0.152341 | 6.395955 | 0.248597 | 0.80478  | 0.970836 | -4.62195 |
| REPS1    | NM_001128617.2 | 0     | 0.07369  | 7.156387 | 0.248458 | 0.804887 | 0.970836 | -4.62195 |
| IFIH1    | NM_022168.2    | 0.003 | -0.1056  | 6.32183  | -0.24674 | 0.806211 | 0.970836 | -4.62198 |
| DOCK9    | NM_001130048.1 | 0.024 | -0.10078 | 4.890024 | -0.24651 | 0.806388 | 0.970836 | -4.62198 |
| FYN      | NM_002037.3    | 0     | -0.09802 | 8.416811 | -0.24187 | 0.809958 | 0.972743 | -4.62205 |
| CFP      | NM_002621.2    | 0     | -0.07898 | 8.814278 | -0.23825 | 0.812743 | 0.973702 | -4.62209 |
| CD53     | NM_001040033.1 | 0     | 0.059065 | 10.19694 | 0.22921  | 0.819723 | 0.975681 | -4.62221 |
| LTF      | NM_002343.2    | 0.075 | -0.23615 | 5.834957 | -0.22627 | 0.821995 | 0.975681 | -4.62225 |
| FLT3LG   | NM_001459.3    | 0     | 0.075226 | 7.123105 | 0.219574 | 0.827175 | 0.975681 | -4.62234 |
| ITCH     | NM_001257138.1 | 0     | -0.05148 | 8.144915 | -0.21839 | 0.828092 | 0.975681 | -4.62235 |
| ITGA4    | NM_000885.4    | 0     | -0.05202 | 7.618351 | -0.21817 | 0.828263 | 0.975681 | -4.62235 |
| APP      | NM_000484.3    | 0     | 0.060948 | 7.831006 | 0.217769 | 0.828573 | 0.975681 | -4.62236 |
| FUT7     | NM_004479.3    | 0.058 | -0.16615 | 5.104936 | -0.21739 | 0.828867 | 0.975681 | -4.62236 |
| CD96     | NM_005816.4    | 0.007 | 0.127162 | 7.013041 | 0.212177 | 0.832907 | 0.975681 | -4.62243 |
| IRF1     | NM_002198.1    | 0     | 0.097373 | 10.24649 | 0.208115 | 0.836058 | 0.975681 | -4.62248 |
| CD7      | NM_006137.6    | 0.007 | 0.11275  | 6.681639 | 0.206931 | 0.836978 | 0.975681 | -4.62249 |
| C1QB     | NM_000491.3    | 0.195 | 0.181173 | 3.174431 | 0.206233 | 0.83752  | 0.975681 | -4.6225  |
| FCGR3A   | NM_000569.6    | 0     | -0.10783 | 8.95422  | -0.20128 | 0.841369 | 0.975681 | -4.62255 |
| TAB1     | NM_153497.2    | 0.027 | -0.13239 | 4.629758 | -0.19963 | 0.842648 | 0.975681 | -4.62257 |

|          |             |       |          |          |          |          |          |          |
|----------|-------------|-------|----------|----------|----------|----------|----------|----------|
| CCR3     | NM_001837.2 | 0.455 | -0.18313 | 2.209823 | -0.19755 | 0.844271 | 0.975681 | -4.6226  |
| TLR10    | NM_030956.2 | 0.096 | 0.149076 | 3.445633 | 0.194534 | 0.846615 | 0.975681 | -4.62263 |
| IKBKB    | NM_001556.1 | 0.024 | -0.08512 | 4.93791  | -0.19404 | 0.846999 | 0.975681 | -4.62264 |
| SIGIRR   | NM_021805.2 | 0.007 | 0.09702  | 6.474541 | 0.19244  | 0.848245 | 0.975681 | -4.62265 |
| CREB5    | NM_182898.2 | 0.007 | -0.09888 | 6.674693 | -0.18958 | 0.850475 | 0.975955 | -4.62268 |
| IRAK4    | NM_016123.1 | 0.007 | 0.072142 | 5.505175 | 0.179233 | 0.858542 | 0.976271 | -4.62279 |
| PTGS2    | NM_000963.1 | 0.034 | 0.161169 | 6.999915 | 0.172517 | 0.863788 | 0.976271 | -4.62286 |
| IFI16    | NM_005531.1 | 0     | 0.059532 | 6.92399  | 0.170045 | 0.865721 | 0.976271 | -4.62288 |
| IL1B     | NM_000576.2 | 0.031 | -0.15845 | 7.188556 | -0.16856 | 0.866886 | 0.976271 | -4.6229  |
| LCN2     | NM_005564.3 | 0.007 | 0.133389 | 6.478134 | 0.167366 | 0.867816 | 0.976271 | -4.62291 |
| MSR1     | NM_002445.3 | 0.082 | -0.14595 | 3.928942 | -0.16716 | 0.867979 | 0.976271 | -4.62291 |
| CD8B     | NM_004931.3 | 0.024 | 0.108528 | 5.719368 | 0.16709  | 0.868032 | 0.976271 | -4.62291 |
| IL3RA    | NM_002183.2 | 0.161 | -0.1171  | 3.213654 | -0.16486 | 0.869773 | 0.976271 | -4.62293 |
| MICB     | NM_005931.3 | 0     | 0.036116 | 6.836105 | 0.163945 | 0.870493 | 0.976271 | -4.62294 |
| ZAP70    | NM_001079.3 | 0.003 | 0.094757 | 7.326226 | 0.161684 | 0.872264 | 0.976271 | -4.62296 |
| CASP3    | NM_032991.2 | 0.007 | -0.05896 | 5.089648 | -0.15388 | 0.878378 | 0.976271 | -4.62303 |
| MAP3K7   | NM_145333.1 | 0     | -0.04317 | 6.660926 | -0.15047 | 0.881053 | 0.976271 | -4.62306 |
| IL16     | NM_004513.4 | 0     | 0.030216 | 7.747595 | 0.148558 | 0.882552 | 0.976271 | -4.62308 |
| TNFSF4   | NM_003326.2 | 0.007 | -0.09259 | 5.133709 | -0.14847 | 0.882625 | 0.976271 | -4.62308 |
| TAP1     | NM_000593.5 | 0     | -0.04654 | 7.545978 | -0.14665 | 0.884053 | 0.976271 | -4.62309 |
| CD14     | NM_000591.2 | 0     | 0.06416  | 9.172324 | 0.14629  | 0.884332 | 0.976271 | -4.6231  |
| CD5      | NM_014207.2 | 0.007 | 0.082539 | 7.011149 | 0.144423 | 0.885798 | 0.976271 | -4.62311 |
| HLA-DQB1 | NM_002123.3 | 0.315 | 0.176266 | 5.047712 | 0.139809 | 0.889422 | 0.976271 | -4.62315 |
| TCF7     | NM_003202.2 | 0.021 | 0.088829 | 6.956808 | 0.138758 | 0.890247 | 0.976271 | -4.62316 |
| KLRK1    | NM_007360.3 | 0.007 | -0.08649 | 8.024475 | -0.13831 | 0.890599 | 0.976271 | -4.62316 |
| CLEC4A   | NM_194448.2 | 0     | -0.04192 | 8.014145 | -0.13423 | 0.893805 | 0.977381 | -4.62319 |
| ITGB2    | NM_000211.2 | 0     | -0.04401 | 10.7826  | -0.13195 | 0.895601 | 0.977381 | -4.62321 |
| PRF1     | NM_005041.3 | 0.007 | 0.095612 | 8.41812  | 0.129031 | 0.897896 | 0.977709 | -4.62323 |
| CD9      | NM_001769.2 | 0     | 0.059064 | 6.293884 | 0.124235 | 0.901671 | 0.979642 | -4.62327 |
| ICAM3    | NM_002162.3 | 0     | 0.026997 | 9.41513  | 0.120071 | 0.90495  | 0.98103  | -4.62329 |

|         |                |       |          |          |          |          |          |          |
|---------|----------------|-------|----------|----------|----------|----------|----------|----------|
| LY96    | NM_015364.2    | 0     | -0.05175 | 8.017329 | -0.11296 | 0.910551 | 0.984923 | -4.62334 |
| SYK     | NM_003177.3    | 0     | -0.04133 | 7.852431 | -0.10375 | 0.917821 | 0.986441 | -4.6234  |
| TYK2    | NM_003331.3    | 0     | -0.02724 | 6.846544 | -0.10359 | 0.917942 | 0.986441 | -4.6234  |
| NOD1    | NM_006092.1    | 0.082 | 0.060016 | 3.821186 | 0.10105  | 0.91995  | 0.986441 | -4.62341 |
| CD99    | NM_002414.3    | 0     | -0.03714 | 9.897383 | -0.1004  | 0.920466 | 0.986441 | -4.62342 |
| LCP1    | NM_002298.4    | 0     | 0.029029 | 11.29639 | 0.097211 | 0.922982 | 0.986441 | -4.62344 |
| CD40LG  | NM_000074.2    | 0.082 | 0.074072 | 3.902024 | 0.095376 | 0.924431 | 0.986441 | -4.62345 |
| IL6     | NM_000600.1    | 0.027 | 0.056079 | 5.404137 | 0.092353 | 0.926819 | 0.986441 | -4.62346 |
| PYCARD  | NM_013258.3    | 0     | -0.03132 | 7.012295 | -0.09035 | 0.9284   | 0.986441 | -4.62347 |
| PDGFRB  | NM_002609.3    | 0.349 | -0.05768 | 2.205225 | -0.0862  | 0.931683 | 0.986441 | -4.62349 |
| MARCO   | NM_006770.3    | 0.031 | 0.066695 | 5.389415 | 0.083793 | 0.933585 | 0.986441 | -4.6235  |
| CD44    | NM_001001392.1 | 0     | 0.028323 | 11.23368 | 0.083142 | 0.934099 | 0.986441 | -4.62351 |
| IFI27   | NM_005532.3    | 0.202 | -0.12779 | 4.230699 | -0.07516 | 0.940417 | 0.990977 | -4.62354 |
| TOLLIP  | NM_019009.2    | 0.01  | -0.02107 | 5.238364 | -0.06926 | 0.945085 | 0.991769 | -4.62357 |
| CTSG    | NM_001911.2    | 0.462 | -0.0673  | 1.970743 | -0.06909 | 0.945217 | 0.991769 | -4.62357 |
| GTF3C1  | NM_001520.3    | 0.007 | 0.016541 | 5.587329 | 0.063342 | 0.949769 | 0.992338 | -4.62359 |
| TAL1    | NM_003189.2    | 0.058 | 0.050823 | 4.597146 | 0.062782 | 0.950213 | 0.992338 | -4.62359 |
| HLA-DOB | NM_002120.3    | 0.01  | 0.026431 | 5.360608 | 0.054653 | 0.956652 | 0.992338 | -4.62362 |
| CCL3L1  | NM_021006.4    | 0     | -0.0225  | 9.002363 | -0.05351 | 0.957559 | 0.992338 | -4.62362 |
| GNLY    | NM_006433.2    | 0.003 | -0.03645 | 9.761048 | -0.04831 | 0.96168  | 0.992338 | -4.62364 |
| IRF2    | NM_002199.3    | 0     | 0.019134 | 6.138062 | 0.046619 | 0.963019 | 0.992338 | -4.62364 |
| IL2RB   | NM_000878.2    | 0.014 | 0.030459 | 6.905447 | 0.045547 | 0.963869 | 0.992338 | -4.62364 |
| ITK     | NM_005546.3    | 0.007 | -0.02542 | 7.125809 | -0.04534 | 0.964033 | 0.992338 | -4.62365 |
| CD1C    | NM_001765.2    | 0.113 | 0.035226 | 4.171535 | 0.043084 | 0.965821 | 0.992338 | -4.62365 |
| CD247   | NM_198053.1    | 0.007 | -0.02427 | 7.865711 | -0.04026 | 0.968062 | 0.992338 | -4.62366 |
| IRAK2   | NM_001570.3    | 0.021 | -0.02428 | 4.840822 | -0.04002 | 0.968249 | 0.992338 | -4.62366 |
| TLR8    | NM_016610.2    | 0.014 | -0.01725 | 5.419839 | -0.03774 | 0.970061 | 0.992338 | -4.62366 |
| JAK3    | NM_000215.2    | 0     | -0.00995 | 7.815328 | -0.02943 | 0.976648 | 0.994033 | -4.62368 |
| BST1    | NM_004334.2    | 0     | 0.011095 | 8.513588 | 0.029293 | 0.976758 | 0.994033 | -4.62368 |
| CCL5    | NM_002985.2    | 0     | 0.014414 | 10.64813 | 0.027974 | 0.977804 | 0.994033 | -4.62368 |

|                                                   |             |       |          |          |          |          |          |          |
|---------------------------------------------------|-------------|-------|----------|----------|----------|----------|----------|----------|
| ATG5                                              | NM_004849.2 | 0     | 0.007738 | 6.140491 | 0.024319 | 0.980704 | 0.994917 | -4.62369 |
| SOCS1                                             | NM_003745.1 | 0.024 | 0.011155 | 5.50065  | 0.01948  | 0.984543 | 0.99645  | -4.62369 |
| SERPING1                                          | NM_000062.2 | 0.024 | -0.01565 | 5.143837 | -0.01729 | 0.986282 | 0.99645  | -4.6237  |
| MAPK14                                            | NM_001315.1 | 0     | 0.005991 | 8.403621 | 0.014464 | 0.988522 | 0.996658 | -4.6237  |
| NLRC5                                             | NM_032206.4 | 0.003 | 0.003522 | 7.111103 | 0.008708 | 0.99309  | 0.997255 | -4.6237  |
| JAK2                                              | NM_004972.2 | 0     | 0.00157  | 8.03719  | 0.005638 | 0.995526 | 0.997255 | -4.6237  |
| CD163                                             | NM_004244.4 | 0.007 | -0.00291 | 7.068783 | -0.00495 | 0.996075 | 0.997255 | -4.6237  |
| NFKB1                                             | NM_003998.2 | 0.003 | -0.00128 | 5.894697 | -0.00346 | 0.997255 | 0.997255 | -4.6237  |
| <b>D. Rd at C3D1 versus C1D1, CyTOF corrected</b> |             |       |          |          |          |          |          |          |
| IL11RA                                            | NM_147162.1 | 0.161 | 1.798013 | 3.286179 | 3.426965 | 0.001296 | 0.635194 | -4.20086 |
| IL10                                              | NM_000572.2 | 0.253 | 1.483469 | 3.047345 | 2.519011 | 0.01531  | 0.985398 | -4.38054 |
| CARD11                                            | NM_032415.2 | 0     | 0.804981 | 6.802    | 2.507854 | 0.015741 | 0.985398 | -4.3826  |
| C2                                                | NM_000063.3 | 0.243 | 1.695595 | 2.476793 | 2.414457 | 0.019797 | 0.985398 | -4.39959 |
| KIR_Activating_Subgroup_2                         | NM_014512.1 | 0.349 | 1.531017 | 2.183157 | 2.408508 | 0.020084 | 0.985398 | -4.40066 |
| MERTK                                             | NM_006343.2 | 0.171 | 1.555945 | 2.777205 | 2.387631 | 0.021125 | 0.985398 | -4.4044  |
| IL3RA                                             | NM_002183.2 | 0.161 | 1.281985 | 3.213654 | 2.364291 | 0.022345 | 0.985398 | -4.40857 |
| CD40                                              | NM_001250.4 | 0.021 | 0.930806 | 5.185361 | 2.291576 | 0.026561 | 0.985398 | -4.42138 |
| STAT4                                             | NM_003151.2 | 0.003 | 0.696408 | 6.278248 | 2.183726 | 0.034123 | 0.985398 | -4.43993 |
| FCGR1A                                            | NM_000566.3 | 0.202 | 1.320929 | 2.641645 | 2.173499 | 0.034931 | 0.985398 | -4.44166 |
| BLK                                               | NM_001715.2 | 0.12  | 1.162324 | 3.613267 | 2.126549 | 0.038858 | 0.985398 | -4.44954 |
| TNFSF13                                           | NM_003808.3 | 0     | 0.571923 | 6.751035 | 2.083547 | 0.042789 | 0.985398 | -4.45665 |
| S100B                                             | NM_006272.1 | 0.5   | 1.23405  | 2.099881 | 2.069662 | 0.044131 | 0.985398 | -4.45893 |
| IL1RN                                             | NM_000577.3 | 0.003 | -1.22649 | 7.831008 | -2.06118 | 0.044968 | 0.985398 | -4.46031 |
| BMI1                                              | NM_005180.5 | 0     | -0.62793 | 8.109578 | -2.03535 | 0.047604 | 0.985398 | -4.46451 |
| CYBB                                              | NM_000397.3 | 0     | 0.517487 | 9.618004 | 2.014234 | 0.049858 | 0.985398 | -4.46791 |
| PAX5                                              | NM_016734.1 | 0.178 | 1.103911 | 3.936745 | 1.989094 | 0.052661 | 0.985398 | -4.47193 |
| STAT1                                             | NM_007315.2 | 0     | 0.547141 | 8.931527 | 1.968533 | 0.055054 | 0.985398 | -4.47519 |
| KLRC2                                             | NM_002260.3 | 0.134 | 1.204215 | 4.132589 | 1.956614 | 0.056483 | 0.985398 | -4.47707 |
| MSR1                                              | NM_002445.3 | 0.082 | 1.280898 | 3.928942 | 1.921769 | 0.060846 | 0.985398 | -4.48251 |
| NCR1                                              | NM_004829.5 | 0.017 | 0.794154 | 5.448008 | 1.904353 | 0.063133 | 0.985398 | -4.48521 |

|                           |                |       |          |          |          |          |          |          |
|---------------------------|----------------|-------|----------|----------|----------|----------|----------|----------|
| C1QB                      | NM_000491.3    | 0.195 | 1.266757 | 3.174431 | 1.888899 | 0.065224 | 0.985398 | -4.48759 |
| KIR_Inhibiting_Subgroup_1 | NM_014218.2    | 0.243 | 1.023307 | 2.758276 | 1.88749  | 0.065417 | 0.985398 | -4.4878  |
| CD4                       | NM_000616.4    | 0     | 0.457854 | 7.707342 | 1.876581 | 0.066932 | 0.985398 | -4.48947 |
| MS4A1                     | NM_152866.2    | 0.051 | 1.085691 | 5.957998 | 1.863087 | 0.068846 | 0.985398 | -4.49153 |
| ADORA2A                   | NM_000675.3    | 0.003 | -0.97561 | 6.821263 | -1.85864 | 0.069487 | 0.985398 | -4.4922  |
| HLA-DRB3                  | NM_022555.3    | 0     | 0.465345 | 11.11413 | 1.857576 | 0.069642 | 0.985398 | -4.49237 |
| FOXJ1                     | NM_001454.3    | 0     | -0.62397 | 5.445389 | -1.84075 | 0.072117 | 0.985398 | -4.49491 |
| IRF8                      | NM_002163.2    | 0     | 0.448319 | 7.368256 | 1.801297 | 0.078217 | 0.985398 | -4.5008  |
| CD22                      | NM_001771.2    | 0.068 | 1.034121 | 5.510924 | 1.79968  | 0.078476 | 0.985398 | -4.50104 |
| HLA-DOB                   | NM_002120.3    | 0.01  | 0.655737 | 5.360608 | 1.77614  | 0.082329 | 0.985398 | -4.50451 |
| LAIR2                     | NM_002288.3    | 0.014 | 0.729444 | 4.742557 | 1.762494 | 0.084634 | 0.985398 | -4.5065  |
| IL32                      | NM_001012633.1 | 0     | -0.5347  | 11.05665 | -1.74021 | 0.088513 | 0.985398 | -4.50973 |
| ELK1                      | NM_005229.3    | 0.031 | -0.66941 | 4.410011 | -1.72591 | 0.09108  | 0.985398 | -4.51179 |
| CD33                      | NM_001177608.1 | 0.024 | 0.768086 | 5.292569 | 1.722795 | 0.091647 | 0.985398 | -4.51224 |
| IRF3                      | NM_001571.5    | 0.01  | -0.58442 | 5.238257 | -1.72265 | 0.091674 | 0.985398 | -4.51226 |
| HLA-DMA                   | NM_006120.3    | 0     | 0.380097 | 8.465897 | 1.718564 | 0.092423 | 0.985398 | -4.51284 |
| PRKCD                     | NM_006254.3    | 0     | -0.44599 | 8.930837 | -1.70272 | 0.095374 | 0.985398 | -4.5151  |
| TNFRSF13B                 | NM_012452.2    | 0.418 | 1.038179 | 1.560851 | 1.657593 | 0.10421  | 0.985398 | -4.52144 |
| TNFRSF13C                 | NM_052945.3    | 0.045 | 0.78931  | 5.933964 | 1.605358 | 0.115264 | 0.985398 | -4.52861 |
| HLA-DRA                   | NM_019111.3    | 0     | 0.362028 | 12.4152  | 1.603477 | 0.115679 | 0.985398 | -4.52886 |
| NLRC5                     | NM_032206.4    | 0.003 | 0.493656 | 7.111103 | 1.598959 | 0.116681 | 0.985398 | -4.52947 |
| LTF                       | NM_002343.2    | 0.075 | -1.2637  | 5.834957 | -1.5861  | 0.119573 | 0.985398 | -4.53121 |
| LAMP2                     | NM_001122606.1 | 0     | -0.29186 | 7.404305 | -1.58413 | 0.120019 | 0.985398 | -4.53147 |
| NFKBIA                    | NM_020529.1    | 0     | -0.57049 | 13.82902 | -1.54487 | 0.129235 | 0.985398 | -4.53668 |
| REPS1                     | NM_001128617.2 | 0     | -0.34728 | 7.156387 | -1.53382 | 0.131927 | 0.985398 | -4.53813 |
| CXCR2                     | NM_001557.2    | 0.058 | -0.92439 | 6.942205 | -1.52391 | 0.134381 | 0.985398 | -4.53942 |
| TLR5                      | NM_003268.3    | 0.202 | 0.994227 | 3.397969 | 1.519796 | 0.135411 | 0.985398 | -4.53995 |
| PSMB10                    | NM_002801.2    | 0     | 0.26136  | 8.863405 | 1.51684  | 0.136154 | 0.985398 | -4.54034 |
| LTBR                      | NM_002342.1    | 0.007 | 0.545352 | 6.427198 | 1.508733 | 0.13821  | 0.985398 | -4.54138 |
| NFKB2                     | NM_002502.2    | 0     | -0.55114 | 9.750106 | -1.50358 | 0.13953  | 0.985398 | -4.54205 |

|           |                |       |          |          |          |          |          |          |
|-----------|----------------|-------|----------|----------|----------|----------|----------|----------|
| KLRC1     | NM_002259.3    | 0.079 | 0.841469 | 4.543482 | 1.498593 | 0.140816 | 0.985398 | -4.54269 |
| KLRF1     | NM_016523.1    | 0.086 | 0.870079 | 5.565089 | 1.493443 | 0.142154 | 0.985398 | -4.54335 |
| CTSS      | NM_004079.3    | 0     | 0.289409 | 12.63254 | 1.489592 | 0.143161 | 0.985398 | -4.54384 |
| PVR       | NM_006505.3    | 0.182 | 0.887667 | 2.690121 | 1.479458 | 0.145839 | 0.985398 | -4.54513 |
| CXCR3     | NM_001504.1    | 0.11  | 0.819749 | 3.352525 | 1.478869 | 0.145996 | 0.985398 | -4.5452  |
| EGR1      | NM_001964.2    | 0.031 | -0.99761 | 6.651427 | -1.47817 | 0.146183 | 0.985398 | -4.54529 |
| TRAF3     | NM_145725.1    | 0     | -0.31618 | 7.125145 | -1.47816 | 0.146185 | 0.985398 | -4.54529 |
| TOLLIP    | NM_019009.2    | 0.01  | 0.342092 | 5.238364 | 1.472722 | 0.14764  | 0.985398 | -4.54598 |
| CCL4      | NM_002984.2    | 0     | -0.5874  | 7.54716  | -1.46713 | 0.149148 | 0.985398 | -4.54669 |
| HLA-DPA1  | NM_033554.2    | 0     | 0.36533  | 10.19163 | 1.456581 | 0.152029 | 0.985398 | -4.54801 |
| CD59      | NM_000611.4    | 0     | -0.57434 | 6.155392 | -1.45314 | 0.152978 | 0.985398 | -4.54844 |
| SH2D1B    | NM_053282.4    | 0.205 | 0.930876 | 3.51781  | 1.446626 | 0.154786 | 0.985398 | -4.54925 |
| CTSH      | NM_004390.3    | 0     | 0.373184 | 8.71091  | 1.444433 | 0.155399 | 0.985398 | -4.54953 |
| CD180     | NM_005582.2    | 0.164 | 1.0012   | 2.984111 | 1.442999 | 0.155801 | 0.985398 | -4.5497  |
| TNFRSF10B | NM_003842.3    | 0.014 | -0.46774 | 5.755992 | -1.44225 | 0.15601  | 0.985398 | -4.5498  |
| NOD1      | NM_006092.1    | 0.082 | 0.644113 | 3.821186 | 1.42064  | 0.162169 | 0.985398 | -4.55246 |
| IL12RB1   | NM_005535.1    | 0     | 0.316186 | 5.5927   | 1.407719 | 0.165941 | 0.985398 | -4.55404 |
| CD163     | NM_004244.4    | 0.007 | 0.631753 | 7.068783 | 1.406793 | 0.166214 | 0.985398 | -4.55416 |
| PSEN2     | NM_000447.2    | 0.058 | 0.649076 | 3.563695 | 1.406118 | 0.166413 | 0.985398 | -4.55424 |
| CD74      | NM_001025159.1 | 0     | 0.276114 | 12.54212 | 1.38783  | 0.171879 | 0.985398 | -4.55645 |
| GNLY      | NM_006433.2    | 0.003 | 0.798564 | 9.761048 | 1.386571 | 0.172261 | 0.985398 | -4.5566  |
| PNMA1     | NM_006029.4    | 0     | -0.42501 | 5.394446 | -1.38529 | 0.17265  | 0.985398 | -4.55675 |
| CD1C      | NM_001765.2    | 0.113 | 0.860914 | 4.171535 | 1.379317 | 0.174471 | 0.985398 | -4.55747 |
| CD79A     | NM_001783.3    | 0.003 | 0.521337 | 7.370404 | 1.36947  | 0.177506 | 0.985398 | -4.55864 |
| ATF1      | NM_005171.2    | 0.007 | 0.484885 | 5.417584 | 1.366297 | 0.178492 | 0.985398 | -4.55902 |
| CD68      | NM_001251.2    | 0     | 0.324063 | 9.592528 | 1.363337 | 0.179416 | 0.985398 | -4.55937 |
| MAP3K7    | NM_145333.1    | 0     | -0.29844 | 6.660926 | -1.36269 | 0.179618 | 0.985398 | -4.55945 |
| HLA-DPB1  | NM_002121.4    | 0     | 0.322107 | 10.20357 | 1.351574 | 0.183125 | 0.985398 | -4.56076 |
| SH2B2     | NM_020979.3    | 0     | -0.40601 | 6.308864 | -1.34794 | 0.184283 | 0.985398 | -4.56119 |
| POU2AF1   | NM_006235.2    | 0.455 | 0.967175 | 1.810931 | 1.342375 | 0.186066 | 0.985398 | -4.56184 |



|          |             |       |          |          |          |          |          |          |
|----------|-------------|-------|----------|----------|----------|----------|----------|----------|
| CD14     | NM_000591.2 | 0     | 0.443142 | 9.172324 | 1.32356  | 0.192194 | 0.985398 | -4.56402 |
| TNFRSF18 | NM_004195.2 | 0.247 | 0.781296 | 2.462623 | 1.322609 | 0.192508 | 0.985398 | -4.56413 |
| FCER2    | NM_002002.4 | 0.082 | 0.735942 | 4.838727 | 1.320402 | 0.193238 | 0.985398 | -4.56439 |
| MAPKAPK2 | NM_004759.3 | 0     | -0.35918 | 8.36488  | -1.31788 | 0.194073 | 0.985398 | -4.56468 |
| TRAF6    | NM_145803.1 | 0     | -0.30852 | 6.417511 | -1.314   | 0.195365 | 0.985398 | -4.56512 |
| CD1D     | NM_001766.3 | 0     | 0.354061 | 6.577481 | 1.2946   | 0.201924 | 0.985398 | -4.56733 |
| LCN2     | NM_005564.3 | 0.007 | -0.78658 | 6.478134 | -1.29283 | 0.202531 | 0.985398 | -4.56754 |
| CLEC7A   | NM_197954.2 | 0     | -0.4377  | 8.867019 | -1.28908 | 0.203818 | 0.985398 | -4.56796 |
| IL15RA   | NM_002189.2 | 0     | 0.408764 | 5.63609  | 1.287018 | 0.204531 | 0.985398 | -4.56819 |
| PRF1     | NM_005041.3 | 0.007 | 0.725785 | 8.41812  | 1.283039 | 0.205909 | 0.985398 | -4.56864 |
| HLA-DRB4 | NM_021983.4 | 0.586 | 1.651185 | 3.214603 | 1.270467 | 0.210311 | 0.985398 | -4.57005 |
| BLNK     | NM_013314.2 | 0.432 | 0.655209 | 1.742082 | 1.268962 | 0.210842 | 0.985398 | -4.57021 |
| CASP1    | NM_001223.3 | 0     | 0.347511 | 8.0139   | 1.259388 | 0.214247 | 0.985398 | -4.57128 |
| LY96     | NM_015364.2 | 0     | -0.43926 | 8.017329 | -1.25605 | 0.215444 | 0.985398 | -4.57164 |
| CTSL     | NM_001912.4 | 0.205 | 0.983165 | 2.654839 | 1.246762 | 0.2188   | 0.985398 | -4.57267 |
| CFP      | NM_002621.2 | 0     | 0.312735 | 8.814278 | 1.235802 | 0.22281  | 0.985398 | -4.57386 |
| ZAP70    | NM_001079.3 | 0.003 | 0.5486   | 7.326226 | 1.226198 | 0.226369 | 0.985398 | -4.5749  |
| RELA     | NM_021975.2 | 0     | -0.24878 | 6.773554 | -1.22524 | 0.226725 | 0.985398 | -4.57501 |
| PTGS2    | NM_000963.1 | 0.034 | -0.87299 | 6.999915 | -1.22409 | 0.227156 | 0.985398 | -4.57513 |
| TNFRSF9  | NM_001561.4 | 0.329 | 0.632482 | 1.979191 | 1.220433 | 0.228524 | 0.985398 | -4.57553 |
| HLA-DMB  | NM_002118.3 | 0     | 0.35994  | 8.249254 | 1.218738 | 0.229161 | 0.985398 | -4.57571 |
| NCF4     | NM_000631.4 | 0     | -0.40764 | 7.708288 | -1.2176  | 0.229589 | 0.985398 | -4.57583 |
| IFITM2   | NM_006435.2 | 0     | -0.43515 | 11.276   | -1.21664 | 0.229951 | 0.985398 | -4.57593 |
| CSF1R    | NM_005211.2 | 0.164 | 0.919738 | 3.562819 | 1.214371 | 0.230808 | 0.985398 | -4.57618 |
| KLRD1    | NM_002262.3 | 0.014 | 0.67276  | 6.740085 | 1.190213 | 0.240073 | 0.985398 | -4.57874 |
| CD160    | NM_007053.2 | 0.171 | 0.801324 | 3.628464 | 1.186773 | 0.241414 | 0.985398 | -4.5791  |
| MICB     | NM_005931.3 | 0     | -0.19932 | 6.836105 | -1.18523 | 0.242016 | 0.985398 | -4.57926 |
| IKBKE    | NM_014002.2 | 0.027 | 0.56062  | 5.332283 | 1.177081 | 0.245222 | 0.985398 | -4.58012 |
| IFNAR2   | NM_000874.3 | 0     | -0.21461 | 8.322536 | -1.17068 | 0.24776  | 0.985398 | -4.58078 |
| CCR7     | NM_001838.2 | 0.113 | 0.65721  | 4.026042 | 1.16605  | 0.249608 | 0.985398 | -4.58126 |

|         |                |       |          |          |          |          |          |          |
|---------|----------------|-------|----------|----------|----------|----------|----------|----------|
| CCR2    | NM_001123041.2 | 0.175 | 0.808327 | 3.386746 | 1.152702 | 0.254992 | 0.985398 | -4.58263 |
| CD24    | NM_013230.2    | 0.007 | -0.58048 | 5.739555 | -1.15127 | 0.255576 | 0.985398 | -4.58278 |
| CD47    | NM_001777.3    | 0     | -0.15767 | 8.848972 | -1.14759 | 0.257077 | 0.985398 | -4.58316 |
| NCAM1   | NM_000615.5    | 0.017 | 0.474546 | 4.399241 | 1.142898 | 0.258998 | 0.985398 | -4.58363 |
| SIGIRR  | NM_021805.2    | 0.007 | 0.439093 | 6.474541 | 1.140886 | 0.259826 | 0.985398 | -4.58384 |
| CCR1    | NM_001295.2    | 0.007 | 0.494412 | 6.124604 | 1.139238 | 0.260506 | 0.985398 | -4.584   |
| CD40LG  | NM_000074.2    | 0.082 | -0.67291 | 3.902024 | -1.13498 | 0.262266 | 0.985398 | -4.58443 |
| S100A12 | NM_005621.1    | 0     | 0.401002 | 10.56909 | 1.13164  | 0.263655 | 0.985398 | -4.58477 |
| PRKCE   | NM_005400.2    | 0.151 | 0.683743 | 2.835834 | 1.125524 | 0.266209 | 0.985398 | -4.58538 |
| SPN     | NM_003123.3    | 0.017 | 0.501899 | 5.348767 | 1.112924 | 0.271527 | 0.985398 | -4.58664 |
| INPP5D  | NM_005541.3    | 0     | 0.23806  | 7.652128 | 1.102739 | 0.27588  | 0.985398 | -4.58764 |
| TXNIP   | NM_006472.1    | 0     | -0.25585 | 12.34162 | -1.10197 | 0.27621  | 0.985398 | -4.58772 |
| CD63    | NM_001780.4    | 0     | -0.26926 | 9.814142 | -1.10019 | 0.276979 | 0.985398 | -4.5879  |
| C1QA    | NM_015991.2    | 0.127 | 0.67106  | 4.005041 | 1.088955 | 0.281849 | 0.985398 | -4.58899 |
| LTA     | NM_000595.2    | 0.017 | 0.533619 | 5.278901 | 1.085169 | 0.283505 | 0.985398 | -4.58936 |
| FCER1G  | NM_004106.1    | 0     | 0.331335 | 10.81787 | 1.079744 | 0.285889 | 0.985398 | -4.58988 |
| PLAU    | NM_002658.2    | 0.226 | -1.16833 | 4.97886  | -1.07792 | 0.286695 | 0.985398 | -4.59006 |
| MR1     | NM_001531.2    | 0.062 | -0.52992 | 3.474107 | -1.06673 | 0.291666 | 0.985398 | -4.59113 |
| TLR1    | NM_003263.3    | 0     | -0.28981 | 7.71714  | -1.06282 | 0.293416 | 0.985398 | -4.5915  |
| GZMK    | NM_002104.2    | 0.01  | 0.523896 | 6.677627 | 1.056708 | 0.296167 | 0.985398 | -4.59208 |
| LILRB2  | NM_005874.1    | 0     | 0.306655 | 7.717561 | 1.056332 | 0.296336 | 0.985398 | -4.59212 |
| ATG16L1 | NM_198890.2    | 0.007 | 0.301853 | 5.810312 | 1.055864 | 0.296548 | 0.985398 | -4.59216 |
| TREM1   | NM_018643.3    | 0     | -0.50133 | 10.27873 | -1.05582 | 0.296569 | 0.985398 | -4.59217 |
| MAP3K1  | NM_005921.1    | 0     | -0.18715 | 8.05806  | -1.03953 | 0.303997 | 0.985398 | -4.5937  |
| IL10RA  | NM_001558.2    | 0     | 0.211834 | 9.547293 | 1.034994 | 0.306086 | 0.985398 | -4.59412 |
| IRF5    | NM_002200.3    | 0     | 0.239199 | 6.435055 | 1.021321 | 0.312447 | 0.985398 | -4.59538 |
| ITGB2   | NM_000211.2    | 0     | 0.257523 | 10.7826  | 1.011482 | 0.31708  | 0.985398 | -4.59628 |
| IL1B    | NM_000576.2    | 0.031 | -0.7256  | 7.188556 | -1.01111 | 0.317255 | 0.985398 | -4.59631 |
| BTK     | NM_000061.1    | 0     | 0.18201  | 6.784176 | 1.006716 | 0.319341 | 0.985398 | -4.59671 |
| TICAM2  | NM_021649.4    | 0.158 | 0.67014  | 2.653328 | 1.003573 | 0.320838 | 0.985398 | -4.59699 |

|                           |                |       |          |          |          |          |          |          |
|---------------------------|----------------|-------|----------|----------|----------|----------|----------|----------|
| GZMB                      | NM_004131.3    | 0.003 | 0.500539 | 8.562487 | 1.002875 | 0.321171 | 0.985398 | -4.59706 |
| TAP1                      | NM_000593.5    | 0     | -0.24175 | 7.545978 | -0.99779 | 0.323606 | 0.985398 | -4.59751 |
| CTSW                      | NM_001335.3    | 0.003 | 0.391668 | 7.545881 | 0.993234 | 0.325796 | 0.985398 | -4.59792 |
| LY86                      | NM_004271.3    | 0     | 0.263605 | 7.747927 | 0.986621 | 0.328993 | 0.985398 | -4.59851 |
| CCR6                      | NM_031409.2    | 0.301 | 0.609659 | 1.833526 | 0.984735 | 0.329909 | 0.985398 | -4.59868 |
| RUNX1                     | NM_001754.4    | 0     | 0.243288 | 6.466619 | 0.984052 | 0.330241 | 0.985398 | -4.59874 |
| CD36                      | NM_001001548.2 | 0     | 0.228364 | 9.11305  | 0.982701 | 0.330898 | 0.985398 | -4.59886 |
| TFEB                      | NM_007162.2    | 0.014 | 0.373534 | 5.550239 | 0.980875 | 0.331789 | 0.985398 | -4.59902 |
| IFIT2                     | NM_001547.4    | 0.003 | 0.595959 | 7.040508 | 0.975957 | 0.334194 | 0.985398 | -4.59945 |
| CARD9                     | NM_052813.4    | 0.089 | 0.498482 | 4.147282 | 0.974736 | 0.334793 | 0.985398 | -4.59956 |
| KLRG1                     | NM_005810.3    | 0.051 | 0.483053 | 5.462645 | 0.973964 | 0.335172 | 0.985398 | -4.59963 |
| CDKN1A                    | NM_000389.2    | 0     | 0.237441 | 9.021987 | 0.972699 | 0.335794 | 0.985398 | -4.59974 |
| CD38                      | NM_001775.2    | 0.007 | 0.518244 | 5.538861 | 0.972497 | 0.335893 | 0.985398 | -4.59976 |
| MIF                       | NM_002415.1    | 0     | -0.24117 | 8.051564 | -0.96878 | 0.337725 | 0.985398 | -4.60008 |
| CSF3R                     | NM_156038.2    | 0     | -0.41973 | 10.61811 | -0.96598 | 0.33911  | 0.985398 | -4.60033 |
| PSMB9                     | NM_002800.4    | 0     | 0.267738 | 8.72407  | 0.963997 | 0.340091 | 0.985398 | -4.6005  |
| MAF                       | NM_005360.4    | 0.021 | 0.50638  | 5.119079 | 0.963031 | 0.340571 | 0.985398 | -4.60058 |
| BCL10                     | NM_003921.2    | 0     | -0.18342 | 8.084753 | -0.96174 | 0.341211 | 0.985398 | -4.60069 |
| CD244                     | NM_016382.2    | 0.017 | 0.463828 | 5.927828 | 0.959805 | 0.342174 | 0.985398 | -4.60086 |
| IGF1R                     | NM_000875.2    | 0     | -0.36227 | 6.662979 | -0.95651 | 0.343819 | 0.985398 | -4.60115 |
| CCR5                      | NM_000579.1    | 0.462 | 0.577957 | 1.470938 | 0.953434 | 0.345357 | 0.985398 | -4.60141 |
| MAPK14                    | NM_001315.1    | 0     | -0.30137 | 8.403621 | -0.95319 | 0.34548  | 0.985398 | -4.60143 |
| TBX21                     | NM_013351.1    | 0.007 | 0.389253 | 6.903745 | 0.946586 | 0.348799 | 0.985398 | -4.602   |
| BCL2                      | NM_000657.2    | 0     | 0.257587 | 6.051298 | 0.945012 | 0.349593 | 0.985398 | -4.60213 |
| CXCR4                     | NM_003467.2    | 0     | -0.2472  | 11.71915 | -0.94296 | 0.350633 | 0.985398 | -4.60231 |
| KIR_Inhibiting_Subgroup_2 | NM_014511.3    | 0.466 | 0.492236 | 1.661611 | 0.934703 | 0.354826 | 0.985398 | -4.60301 |
| SYK                       | NM_003177.3    | 0     | 0.284192 | 7.852431 | 0.934569 | 0.354894 | 0.985398 | -4.60302 |
| ABCB1                     | NM_000927.3    | 0.092 | 0.39259  | 4.00911  | 0.930747 | 0.356847 | 0.985398 | -4.60334 |
| IL1RAP                    | NM_002182.2    | 0     | -0.39401 | 6.309927 | -0.92171 | 0.361491 | 0.985398 | -4.6041  |
| CD79B                     | NM_021602.2    | 0     | 0.350988 | 6.988636 | 0.921661 | 0.361517 | 0.985398 | -4.6041  |

|                           |                |       |          |          |          |          |          |          |
|---------------------------|----------------|-------|----------|----------|----------|----------|----------|----------|
| TNFRSF10C                 | NM_003841.3    | 0.106 | -0.62941 | 5.932921 | -0.91866 | 0.363068 | 0.985398 | -4.60435 |
| PSEN1                     | NM_000021.2    | 0     | 0.178264 | 6.561164 | 0.917105 | 0.363874 | 0.985398 | -4.60448 |
| IL8                       | NM_000584.2    | 0     | -0.45061 | 13.63443 | -0.91    | 0.36757  | 0.985398 | -4.60507 |
| RIPK2                     | NM_003821.5    | 0     | 0.280051 | 8.631872 | 0.90963  | 0.367763 | 0.985398 | -4.6051  |
| TNFRSF14                  | NM_003820.2    | 0     | 0.154836 | 7.563062 | 0.906023 | 0.369648 | 0.985398 | -4.6054  |
| MX1                       | NM_002462.2    | 0     | -0.38922 | 7.86973  | -0.90518 | 0.370089 | 0.985398 | -4.60547 |
| ENTPD1                    | NM_001098175.1 | 0.092 | 0.500612 | 4.032419 | 0.902925 | 0.371273 | 0.985398 | -4.60565 |
| TGFB1                     | NM_000660.3    | 0     | -0.22283 | 10.97278 | -0.89472 | 0.375599 | 0.985398 | -4.60632 |
| HLA-C                     | NM_002117.4    | 0     | -0.17748 | 12.5779  | -0.89321 | 0.376397 | 0.985398 | -4.60644 |
| HLA-E                     | NM_005516.4    | 0     | -0.16399 | 11.62095 | -0.89042 | 0.377879 | 0.985398 | -4.60667 |
| NUP107                    | NM_020401.2    | 0.003 | -0.18521 | 5.270172 | -0.89022 | 0.377981 | 0.985398 | -4.60668 |
| KIR_Activating_Subgroup_1 | NM_001083539.1 | 0.469 | 0.623683 | 1.765709 | 0.879066 | 0.383937 | 0.985398 | -4.60758 |
| TAPBP                     | NM_003190.4    | 0     | -0.17612 | 9.897147 | -0.8789  | 0.384027 | 0.985398 | -4.60759 |
| IL16                      | NM_004513.4    | 0     | -0.13646 | 7.747595 | -0.87885 | 0.384053 | 0.985398 | -4.6076  |
| CD9                       | NM_001769.2    | 0     | -0.31866 | 6.293884 | -0.87801 | 0.384504 | 0.985398 | -4.60766 |
| CD7                       | NM_006137.6    | 0.007 | 0.361263 | 6.681639 | 0.868525 | 0.389619 | 0.985398 | -4.60842 |
| ITGAM                     | NM_000632.3    | 0     | 0.237039 | 8.134644 | 0.8665   | 0.390716 | 0.985398 | -4.60858 |
| UBC                       | NM_021009.3    | 0     | -0.18745 | 14.13579 | -0.86254 | 0.392867 | 0.985398 | -4.60889 |
| AKT3                      | NM_181690.1    | 0.003 | -0.26645 | 6.175368 | -0.85623 | 0.39631  | 0.985398 | -4.60938 |
| MAP2K4                    | NM_003010.2    | 0.171 | 0.557116 | 2.984437 | 0.855578 | 0.396669 | 0.985398 | -4.60943 |
| DUSP4                     | NM_057158.2    | 0.164 | 0.634357 | 3.60756  | 0.852835 | 0.398173 | 0.985398 | -4.60964 |
| CD274                     | NM_014143.3    | 0.469 | 0.561323 | 1.426443 | 0.852155 | 0.398546 | 0.985398 | -4.6097  |
| IRAK2                     | NM_001570.3    | 0.021 | -0.39375 | 4.840822 | -0.85012 | 0.399665 | 0.985398 | -4.60985 |
| RPS6                      | NM_001010.2    | 0     | -0.20137 | 12.83735 | -0.84759 | 0.401058 | 0.985398 | -4.61005 |
| ITCH                      | NM_001257138.1 | 0     | -0.15246 | 8.144915 | -0.84724 | 0.401249 | 0.985398 | -4.61008 |
| HLA-A                     | NM_002116.5    | 0     | -0.15709 | 13.41276 | -0.84539 | 0.40227  | 0.985398 | -4.61022 |
| ECSIT                     | NM_001142464.2 | 0.003 | -0.28683 | 4.991808 | -0.84477 | 0.402612 | 0.985398 | -4.61027 |
| NFKB1                     | NM_003998.2    | 0.003 | -0.23798 | 5.894697 | -0.84377 | 0.403166 | 0.985398 | -4.61034 |
| BCL2L1                    | NM_001191.2    | 0     | -0.50513 | 8.045029 | -0.84269 | 0.403765 | 0.985398 | -4.61043 |
| CD96                      | NM_005816.4    | 0.007 | 0.383725 | 7.013041 | 0.838707 | 0.405974 | 0.985398 | -4.61073 |

|          |                |       |          |          |          |          |          |          |
|----------|----------------|-------|----------|----------|----------|----------|----------|----------|
| ITGAE    | NM_002208.4    | 0     | -0.18784 | 6.65954  | -0.83572 | 0.407633 | 0.985398 | -4.61096 |
| IFNGR1   | NM_000416.1    | 0     | -0.20409 | 8.702158 | -0.83464 | 0.408237 | 0.985398 | -4.61104 |
| SIGLEC1  | NM_023068.3    | 0.182 | 0.778307 | 3.727891 | 0.823779 | 0.414318 | 0.989111 | -4.61186 |
| PIN1     | NM_006221.2    | 0     | 0.155316 | 6.481329 | 0.818174 | 0.417479 | 0.989111 | -4.61228 |
| TNFSF8   | NM_001244.3    | 0.007 | 0.226357 | 5.552587 | 0.815575 | 0.418949 | 0.989111 | -4.61247 |
| HMGB1    | NM_002128.4    | 0     | -0.12624 | 9.282678 | -0.81221 | 0.420857 | 0.989111 | -4.61272 |
| IL4R     | NM_000418.2    | 0     | 0.285337 | 7.584634 | 0.810736 | 0.421695 | 0.989111 | -4.61283 |
| ABL1     | NM_005157.3    | 0.014 | 0.253241 | 4.655954 | 0.810399 | 0.421886 | 0.989111 | -4.61286 |
| ALCAM    | NM_001627.3    | 0.048 | -0.35082 | 4.039628 | -0.79932 | 0.428218 | 0.98974  | -4.61367 |
| ITGAL    | NM_002209.2    | 0     | 0.185619 | 8.422515 | 0.798905 | 0.428454 | 0.98974  | -4.6137  |
| TBK1     | NM_013254.2    | 0     | -0.16467 | 6.159074 | -0.79783 | 0.429069 | 0.98974  | -4.61378 |
| BATF     | NM_006399.3    | 0.021 | -0.3048  | 4.086645 | -0.78905 | 0.434133 | 0.98974  | -4.61441 |
| TNFSF13B | NM_006573.4    | 0.003 | 0.368791 | 6.395955 | 0.788332 | 0.434549 | 0.98974  | -4.61447 |
| ANXA1    | NM_000700.1    | 0     | 0.208035 | 11.06642 | 0.785638 | 0.43611  | 0.98974  | -4.61466 |
| LTB      | NM_002341.1    | 0     | -0.30025 | 9.575613 | -0.78061 | 0.439035 | 0.98974  | -4.61502 |
| ATF2     | NM_001256090.1 | 0     | -0.13457 | 6.400367 | -0.77961 | 0.439617 | 0.98974  | -4.61509 |
| TLR7     | NM_016562.3    | 0.473 | 0.472547 | 1.309267 | 0.776929 | 0.44118  | 0.98974  | -4.61528 |
| BID      | NM_001196.2    | 0.038 | -0.23129 | 5.321876 | -0.77194 | 0.444101 | 0.98974  | -4.61563 |
| CCL3     | NM_002983.2    | 0     | -0.2339  | 9.132729 | -0.76575 | 0.44774  | 0.98974  | -4.61607 |
| IL1R2    | NM_173343.1    | 0.027 | -0.57804 | 6.622486 | -0.76409 | 0.44872  | 0.98974  | -4.61619 |
| CLEC4C   | NM_203503.1    | 0.455 | -0.47749 | 1.795366 | -0.76215 | 0.449862 | 0.98974  | -4.61632 |
| CD97     | NM_078481.2    | 0     | -0.14793 | 10.56114 | -0.76119 | 0.450433 | 0.98974  | -4.61639 |
| LYN      | NM_002350.1    | 0     | -0.20414 | 8.436436 | -0.74337 | 0.461039 | 0.994165 | -4.61761 |
| ICOSLG   | NM_015259.4    | 0.055 | 0.416309 | 4.625151 | 0.738401 | 0.464024 | 0.994165 | -4.61795 |
| CCRL2    | NM_003965.4    | 0.072 | 0.335191 | 4.064196 | 0.738224 | 0.464131 | 0.994165 | -4.61796 |
| GZMA     | NM_006144.2    | 0.01  | 0.407997 | 8.241182 | 0.727091 | 0.470857 | 0.994165 | -4.61871 |
| CX3CR1   | NM_001337.3    | 0.021 | 0.479913 | 5.709481 | 0.72272  | 0.473513 | 0.994165 | -4.619   |
| DUSP6    | NM_001946.2    | 0     | 0.271119 | 8.452191 | 0.722469 | 0.473666 | 0.994165 | -4.61902 |
| IL18     | NM_001562.2    | 0.024 | 0.299238 | 5.156855 | 0.711226 | 0.480537 | 0.994165 | -4.61976 |
| THBS1    | NM_003246.2    | 0     | 0.400925 | 10.14454 | 0.710982 | 0.480687 | 0.994165 | -4.61977 |

|         |                |       |          |          |          |          |          |          |
|---------|----------------|-------|----------|----------|----------|----------|----------|----------|
| LILRA1  | NM_006863.1    | 0.038 | 0.322241 | 5.268155 | 0.694129 | 0.491095 | 0.994165 | -4.62086 |
| CD3G    | NM_000073.2    | 0.021 | 0.369027 | 6.097442 | 0.692977 | 0.49181  | 0.994165 | -4.62093 |
| PSMD7   | NM_002811.3    | 0     | -0.11643 | 8.416579 | -0.68911 | 0.494219 | 0.994165 | -4.62118 |
| CASP8   | NM_001228.4    | 0     | -0.20461 | 9.094482 | -0.68032 | 0.499712 | 0.994165 | -4.62173 |
| MAP2K1  | NM_002755.2    | 0     | 0.165455 | 7.380962 | 0.677681 | 0.501371 | 0.994165 | -4.6219  |
| SMAD3   | NM_005902.3    | 0     | 0.199731 | 6.1692   | 0.677581 | 0.501434 | 0.994165 | -4.6219  |
| CREB1   | NM_004379.3    | 0     | 0.177966 | 5.941505 | 0.673589 | 0.503946 | 0.994165 | -4.62215 |
| TNFAIP3 | NM_006290.2    | 0     | -0.23231 | 11.64834 | -0.67045 | 0.505927 | 0.994165 | -4.62235 |
| CCR4    | NM_005508.4    | 0.062 | 0.363232 | 4.255131 | 0.6681   | 0.50741  | 0.994165 | -4.62249 |
| TLR10   | NM_030956.2    | 0.096 | -0.38968 | 3.445633 | -0.66611 | 0.508668 | 0.994165 | -4.62261 |
| CCL3L1  | NM_021006.4    | 0     | -0.21301 | 9.002363 | -0.66345 | 0.510354 | 0.994165 | -4.62278 |
| LILRB1  | NM_001081637.1 | 0.007 | 0.319713 | 6.376977 | 0.663381 | 0.5104   | 0.994165 | -4.62278 |
| TIRAP   | NM_148910.2    | 0.144 | 0.399525 | 2.708772 | 0.661775 | 0.511419 | 0.994165 | -4.62288 |
| IL6ST   | NM_002184.2    | 0     | -0.1595  | 8.370773 | -0.65803 | 0.513799 | 0.994165 | -4.6231  |
| CD70    | NM_001252.2    | 0.346 | -0.38457 | 1.72365  | -0.65631 | 0.514895 | 0.994165 | -4.62321 |
| CXCR5   | NM_001716.3    | 0.171 | 0.422531 | 3.160619 | 0.654911 | 0.515789 | 0.994165 | -4.62329 |
| LILRB3  | NM_006864.2    | 0     | -0.29447 | 8.053259 | -0.65486 | 0.51582  | 0.994165 | -4.6233  |
| EGR2    | NM_000399.3    | 0.164 | -0.56487 | 3.749044 | -0.64869 | 0.519764 | 0.994165 | -4.62367 |
| LRP1    | NM_002332.2    | 0     | 0.17198  | 7.384461 | 0.639945 | 0.525385 | 0.994165 | -4.62419 |
| FOS     | NM_005252.2    | 0     | -0.19543 | 13.08453 | -0.63803 | 0.526619 | 0.994165 | -4.6243  |
| REL     | NM_002908.2    | 0     | 0.169117 | 7.611904 | 0.637376 | 0.527042 | 0.994165 | -4.62434 |
| TLR2    | NM_003264.3    | 0     | -0.20523 | 7.830566 | -0.63167 | 0.530734 | 0.994165 | -4.62467 |
| CD53    | NM_001040033.1 | 0     | -0.12374 | 10.19694 | -0.62902 | 0.532447 | 0.994165 | -4.62482 |
| FCGR2A  | NM_021642.3    | 0     | -0.23441 | 10.11777 | -0.62527 | 0.534886 | 0.994165 | -4.62504 |
| NLRP3   | NM_001079821.2 | 0     | 0.205165 | 7.962799 | 0.624577 | 0.535337 | 0.994165 | -4.62508 |
| LGALS3  | NM_001177388.1 | 0     | 0.205533 | 9.422522 | 0.622842 | 0.536466 | 0.994165 | -4.62518 |
| PYCARD  | NM_013258.3    | 0     | 0.163601 | 7.012295 | 0.618319 | 0.539417 | 0.994165 | -4.62544 |
| SELL    | NR_029467.1    | 0     | -0.19857 | 9.916742 | -0.61678 | 0.54042  | 0.994165 | -4.62553 |
| BST2    | NM_004335.2    | 0     | 0.184229 | 6.957766 | 0.614742 | 0.541756 | 0.994165 | -4.62564 |
| PSMB7   | NM_002799.2    | 0     | -0.11192 | 8.640348 | -0.61213 | 0.543467 | 0.994165 | -4.62579 |

|          |                |       |          |          |          |          |          |          |
|----------|----------------|-------|----------|----------|----------|----------|----------|----------|
| HLA-B    | NM_005514.6    | 0     | -0.11154 | 13.51642 | -0.61044 | 0.544576 | 0.994165 | -4.62589 |
| CSF2RB   | NM_000395.2    | 0     | -0.21024 | 8.902947 | -0.60504 | 0.548127 | 0.994165 | -4.62619 |
| STAT5B   | NM_012448.3    | 0     | 0.206911 | 7.056284 | 0.604949 | 0.548188 | 0.994165 | -4.62619 |
| FUT7     | NM_004479.3    | 0.058 | -0.34724 | 5.104936 | -0.59515 | 0.55466  | 0.994165 | -4.62674 |
| FYN      | NM_002037.3    | 0     | 0.184052 | 8.416811 | 0.594935 | 0.554804 | 0.994165 | -4.62675 |
| CD19     | NM_001770.4    | 0.055 | 0.27334  | 4.931502 | 0.589208 | 0.558606 | 0.994165 | -4.62706 |
| TNFSF12  | NM_003809.2    | 0     | 0.181839 | 7.372529 | 0.586243 | 0.56058  | 0.994165 | -4.62722 |
| MFGE8    | NM_001114614.1 | 0.055 | 0.323355 | 3.889892 | 0.583436 | 0.562452 | 0.994165 | -4.62737 |
| DOCK9    | NM_001130048.1 | 0.024 | 0.181193 | 4.890024 | 0.580557 | 0.564374 | 0.994165 | -4.62753 |
| CD37     | NM_001774.2    | 0.003 | -0.21734 | 7.261653 | -0.5775  | 0.566418 | 0.994165 | -4.62769 |
| CD27     | NM_001242.4    | 0.031 | 0.310402 | 5.179405 | 0.577402 | 0.566486 | 0.994165 | -4.6277  |
| CD48     | NM_001778.2    | 0     | -0.12673 | 10.51527 | -0.5754  | 0.567829 | 0.994165 | -4.6278  |
| CCL20    | NM_004591.1    | 0.411 | -0.39925 | 2.384007 | -0.57153 | 0.570423 | 0.994165 | -4.62801 |
| CFD      | NM_001928.2    | 0     | 0.211902 | 7.118607 | 0.568597 | 0.572397 | 0.994165 | -4.62816 |
| CXCL2    | NM_002089.3    | 0.058 | -0.43033 | 6.548646 | -0.56681 | 0.573602 | 0.994165 | -4.62826 |
| CREB5    | NM_182898.2    | 0.007 | 0.224042 | 6.674693 | 0.562702 | 0.576372 | 0.994165 | -4.62847 |
| CD44     | NM_001001392.1 | 0     | 0.143419 | 11.23368 | 0.551497 | 0.583964 | 0.994165 | -4.62905 |
| TNF      | NM_000594.2    | 0     | -0.20596 | 7.922257 | -0.5439  | 0.589136 | 0.994165 | -4.62943 |
| MICA     | NM_000247.1    | 0.178 | -0.32173 | 2.855832 | -0.54322 | 0.589605 | 0.994165 | -4.62947 |
| PLA2G6   | NM_001004426.1 | 0.034 | 0.183056 | 4.186342 | 0.539663 | 0.592034 | 0.994165 | -4.62965 |
| IL2RG    | NM_000206.1    | 0     | -0.14247 | 8.710508 | -0.53404 | 0.595888 | 0.994165 | -4.62993 |
| KLRB1    | NM_002258.2    | 0.007 | 0.264786 | 7.841228 | 0.531651 | 0.597528 | 0.994165 | -4.63004 |
| ITGA6    | NM_000210.1    | 0.062 | -0.22876 | 4.602096 | -0.53023 | 0.598507 | 0.994165 | -4.63011 |
| CD8B     | NM_004931.3    | 0.024 | -0.26212 | 5.719368 | -0.52864 | 0.599601 | 0.994165 | -4.63019 |
| SERPING1 | NM_000062.2    | 0.024 | 0.365074 | 5.143837 | 0.528221 | 0.599887 | 0.994165 | -4.63021 |
| CD164    | NM_006016.4    | 0     | 0.094587 | 8.324403 | 0.520053 | 0.605522 | 0.994165 | -4.63061 |
| NFATC2   | NM_012340.3    | 0     | 0.115725 | 7.295299 | 0.515135 | 0.608927 | 0.994165 | -4.63085 |
| ITGA2B   | NM_000419.3    | 0     | -0.22403 | 7.979841 | -0.50818 | 0.613758 | 0.994165 | -4.63118 |
| STAT3    | NM_139276.2    | 0     | -0.10941 | 8.892825 | -0.5026  | 0.617648 | 0.994165 | -4.63144 |
| CD83     | NM_004233.3    | 0     | 0.154088 | 10.37966 | 0.50229  | 0.617861 | 0.994165 | -4.63145 |

|         |                |       |          |          |          |          |          |          |
|---------|----------------|-------|----------|----------|----------|----------|----------|----------|
| CTLA4   | NM_005214.3    | 0.01  | 0.220688 | 5.919118 | 0.493286 | 0.624159 | 0.994165 | -4.63187 |
| IL18R1  | NM_003855.2    | 0.106 | 0.323629 | 4.143967 | 0.491665 | 0.625295 | 0.994165 | -4.63194 |
| CYFIP2  | NM_001037332.2 | 0     | 0.117998 | 7.808367 | 0.490391 | 0.62619  | 0.994165 | -4.632   |
| CD46    | NM_172350.1    | 0     | -0.07911 | 8.867534 | -0.48604 | 0.629244 | 0.994165 | -4.6322  |
| IFNAR1  | NM_000629.2    | 0.171 | -0.28254 | 2.773402 | -0.48542 | 0.629687 | 0.994165 | -4.63222 |
| CD3D    | NM_000732.4    | 0.003 | 0.248495 | 8.20291  | 0.4844   | 0.630402 | 0.994165 | -4.63227 |
| TIGIT   | NM_173799.2    | 0.096 | -0.27195 | 3.37671  | -0.48022 | 0.633349 | 0.994165 | -4.63246 |
| PECAM1  | NM_000442.3    | 0     | -0.08984 | 9.131581 | -0.47871 | 0.634415 | 0.994165 | -4.63252 |
| GTF3C1  | NM_001520.3    | 0.007 | 0.095288 | 5.587329 | 0.477991 | 0.634922 | 0.994165 | -4.63256 |
| SLC11A1 | NM_000578.2    | 0     | 0.145084 | 8.524329 | 0.477509 | 0.635262 | 0.994165 | -4.63258 |
| CEBPB   | NM_005194.2    | 0     | -0.12506 | 9.624956 | -0.47455 | 0.637356 | 0.994165 | -4.63271 |
| TLR4    | NM_138554.2    | 0.003 | -0.16331 | 6.848706 | -0.47419 | 0.637611 | 0.994165 | -4.63272 |
| GZMH    | NM_033423.3    | 0.007 | 0.249934 | 8.19661  | 0.473861 | 0.637842 | 0.994165 | -4.63274 |
| SLAMF7  | NM_021181.3    | 0     | -0.18109 | 6.25628  | -0.4737  | 0.637953 | 0.994165 | -4.63275 |
| MAP3K5  | NM_005923.3    | 0     | -0.10371 | 7.690549 | -0.47281 | 0.638584 | 0.994165 | -4.63278 |
| MAPK3   | NM_001040056.1 | 0     | 0.109976 | 6.620495 | 0.470788 | 0.640018 | 0.994165 | -4.63287 |
| MAPK8   | NM_002750.2    | 0.017 | -0.1765  | 4.369522 | -0.46766 | 0.642236 | 0.994165 | -4.63301 |
| IRF1    | NM_002198.1    | 0     | 0.16504  | 10.24649 | 0.462067 | 0.646213 | 0.994165 | -4.63325 |
| BTLA    | NM_181780.2    | 0.034 | 0.22183  | 4.925785 | 0.46024  | 0.647514 | 0.994165 | -4.63333 |
| ATG5    | NM_004849.2    | 0     | -0.11155 | 6.140491 | -0.45925 | 0.648218 | 0.994165 | -4.63337 |
| KLRK1   | NM_007360.3    | 0.007 | 0.218351 | 8.024475 | 0.457412 | 0.64953  | 0.994165 | -4.63345 |
| JAK2    | NM_004972.2    | 0     | 0.096801 | 8.03719  | 0.45527  | 0.651058 | 0.994165 | -4.63354 |
| ICAM1   | NM_000201.2    | 0     | -0.18043 | 8.015949 | -0.45222 | 0.653237 | 0.994165 | -4.63367 |
| HAVCR2  | NM_032782.3    | 0.014 | 0.142535 | 5.163379 | 0.449725 | 0.655022 | 0.994165 | -4.63377 |
| CD3E    | NM_000733.2    | 0.003 | 0.219274 | 7.823806 | 0.449455 | 0.655215 | 0.994165 | -4.63378 |
| ICAM2   | NM_000873.3    | 0     | -0.13245 | 6.481238 | -0.4487  | 0.655757 | 0.994165 | -4.63382 |
| BCL6    | NM_001706.2    | 0     | -0.15977 | 9.634073 | -0.44485 | 0.658518 | 0.994165 | -4.63398 |
| IFI16   | NM_005531.1    | 0     | -0.1188  | 6.92399  | -0.44449 | 0.658772 | 0.994165 | -4.63399 |
| LAG3    | NM_002286.5    | 0.065 | -0.28283 | 4.236761 | -0.43998 | 0.662011 | 0.994165 | -4.63418 |
| ATG7    | NM_001136031.2 | 0.014 | -0.16214 | 5.794977 | -0.43628 | 0.664675 | 0.994165 | -4.63433 |



|          |                |       |          |          |          |          |          |          |
|----------|----------------|-------|----------|----------|----------|----------|----------|----------|
| GPI      | NM_000175.2    | 0     | -0.07737 | 7.703165 | -0.4354  | 0.665307 | 0.994165 | -4.63436 |
| TAB1     | NM_153497.2    | 0.027 | 0.218989 | 4.629758 | 0.43257  | 0.66735  | 0.994165 | -4.63448 |
| NOTCH1   | NM_017617.3    | 0.007 | -0.1265  | 6.291812 | -0.43057 | 0.668795 | 0.994165 | -4.63456 |
| IFIT1    | NM_001548.3    | 0.079 | -0.2889  | 4.978397 | -0.42993 | 0.669259 | 0.994165 | -4.63458 |
| OAS3     | NM_006187.2    | 0.024 | 0.268216 | 5.89985  | 0.42982  | 0.669335 | 0.994165 | -4.63459 |
| NOD2     | NM_022162.1    | 0     | 0.111861 | 6.654154 | 0.428658 | 0.670174 | 0.994165 | -4.63463 |
| IL15     | NM_172174.1    | 0.024 | 0.143066 | 4.544888 | 0.427965 | 0.670675 | 0.994165 | -4.63466 |
| RORA     | NM_134261.2    | 0.003 | 0.162211 | 6.734638 | 0.423973 | 0.673563 | 0.994165 | -4.63482 |
| ICOS     | NM_012092.2    | 0.048 | 0.201361 | 5.329691 | 0.423305 | 0.674046 | 0.994165 | -4.63485 |
| CD6      | NM_006725.3    | 0.014 | -0.19574 | 6.224248 | -0.42095 | 0.675756 | 0.994165 | -4.63494 |
| CXCR1    | NM_000634.2    | 0.38  | 0.308861 | 2.902891 | 0.414014 | 0.680789 | 0.994165 | -4.63521 |
| CD247    | NM_198053.1    | 0.007 | 0.189288 | 7.865711 | 0.411358 | 0.682722 | 0.994165 | -4.63531 |
| ISG20    | NM_002201.4    | 0     | 0.112176 | 7.953218 | 0.407321 | 0.685663 | 0.994165 | -4.63546 |
| CCR3     | NM_001837.2    | 0.455 | -0.28673 | 2.209823 | -0.40516 | 0.687243 | 0.994165 | -4.63554 |
| TNFSF4   | NM_003326.2    | 0.007 | 0.189517 | 5.133709 | 0.398057 | 0.692431 | 0.994165 | -4.63581 |
| IL2RA    | NM_000417.1    | 0.318 | 0.216989 | 2.036021 | 0.39782  | 0.692604 | 0.994165 | -4.63582 |
| POU2F2   | NM_002698.2    | 0.003 | 0.096312 | 6.763863 | 0.397023 | 0.693188 | 0.994165 | -4.63585 |
| ST6GAL1  | NM_003032.2    | 0.003 | 0.107017 | 7.072304 | 0.395042 | 0.694639 | 0.994165 | -4.63592 |
| CD2      | NM_001767.3    | 0.072 | 0.245497 | 4.124985 | 0.392664 | 0.696382 | 0.994165 | -4.63601 |
| CXCL1    | NM_001511.1    | 0.144 | -0.27934 | 5.006703 | -0.38697 | 0.700562 | 0.994165 | -4.63622 |
| HLA-DQA1 | NM_002122.3    | 0.325 | -0.39967 | 5.461318 | -0.38114 | 0.704853 | 0.994165 | -4.63642 |
| YTHDF2   | NM_001172828.1 | 0.01  | -0.07365 | 5.948496 | -0.36949 | 0.713463 | 0.994165 | -4.63683 |
| CD55     | NM_000574.3    | 0.264 | -0.25549 | 3.129697 | -0.36925 | 0.71364  | 0.994165 | -4.63684 |
| PTPRC    | NM_080921.3    | 0     | 0.11398  | 9.185927 | 0.368906 | 0.713891 | 0.994165 | -4.63685 |
| TRAF2    | NM_021138.3    | 0.048 | 0.162844 | 3.805718 | 0.364361 | 0.717259 | 0.994165 | -4.63701 |
| HCK      | NM_002110.2    | 0     | 0.117748 | 9.204422 | 0.362424 | 0.718696 | 0.994165 | -4.63707 |
| TAP2     | NM_000544.3    | 0     | 0.073012 | 7.801693 | 0.357407 | 0.722423 | 0.994165 | -4.63724 |
| AMICA1   | NM_153206.2    | 0     | 0.119384 | 9.092276 | 0.354876 | 0.724306 | 0.994165 | -4.63732 |
| JAM3     | NM_032801.3    | 0.027 | 0.215841 | 5.043229 | 0.351663 | 0.726698 | 0.994165 | -4.63743 |
| LY9      | NM_001033667.1 | 0     | -0.09602 | 6.85593  | -0.34827 | 0.729227 | 0.994165 | -4.63754 |

|          |                |       |          |          |          |          |          |          |
|----------|----------------|-------|----------|----------|----------|----------|----------|----------|
| CD84     | NM_001184879.1 | 0     | 0.07828  | 6.851062 | 0.347664 | 0.72968  | 0.994165 | -4.63756 |
| FCGR2B   | NM_001002273.1 | 0.048 | 0.162018 | 5.255136 | 0.344949 | 0.731706 | 0.994165 | -4.63765 |
| BST1     | NM_004334.2    | 0     | 0.098235 | 8.513588 | 0.339743 | 0.735598 | 0.994165 | -4.63781 |
| IFI27    | NM_005532.3    | 0.202 | 0.440872 | 4.230699 | 0.339638 | 0.735676 | 0.994165 | -4.63782 |
| IL21R    | NM_021798.2    | 0.082 | -0.19217 | 3.672715 | -0.3371  | 0.737573 | 0.994165 | -4.6379  |
| LCK      | NM_005356.2    | 0.003 | 0.155404 | 7.504193 | 0.331861 | 0.741502 | 0.994165 | -4.63806 |
| ILF3     | NM_001137673.1 | 0     | 0.059715 | 8.590258 | 0.32966  | 0.743154 | 0.994165 | -4.63813 |
| TARP     | NM_001003799.1 | 0.003 | 0.130511 | 6.786451 | 0.329066 | 0.743601 | 0.994165 | -4.63815 |
| MAPK1    | NM_138957.2    | 0     | 0.074185 | 8.055641 | 0.325942 | 0.745948 | 0.994165 | -4.63824 |
| IFITM1   | NM_003641.3    | 0     | -0.11274 | 10.37725 | -0.32429 | 0.747193 | 0.994165 | -4.63829 |
| TFRC     | NM_003234.1    | 0     | 0.102544 | 7.865515 | 0.323011 | 0.748152 | 0.994165 | -4.63833 |
| ADA      | NM_000022.2    | 0.007 | -0.07747 | 5.661062 | -0.31603 | 0.753411 | 0.994165 | -4.63854 |
| CD58     | NM_001779.2    | 0     | -0.06736 | 7.654274 | -0.3144  | 0.754639 | 0.994165 | -4.63859 |
| CCND3    | NM_001760.2    | 0     | 0.085204 | 8.792868 | 0.310473 | 0.757605 | 0.994165 | -4.6387  |
| LCP1     | NM_002298.4    | 0     | 0.070607 | 11.29639 | 0.309731 | 0.758165 | 0.994165 | -4.63872 |
| EP300    | NM_001429.2    | 0     | -0.06709 | 8.483865 | -0.30944 | 0.758388 | 0.994165 | -4.63873 |
| ICAM3    | NM_002162.3    | 0     | -0.05269 | 9.41513  | -0.30697 | 0.760253 | 0.994165 | -4.6388  |
| OSM      | NM_020530.4    | 0.014 | -0.16948 | 7.354942 | -0.30281 | 0.7634   | 0.994165 | -4.63892 |
| IL6      | NM_000600.1    | 0.027 | 0.139568 | 5.404137 | 0.301084 | 0.764708 | 0.994165 | -4.63897 |
| MAP2K2   | NM_030662.2    | 0     | 0.057615 | 8.313204 | 0.296004 | 0.76856  | 0.994165 | -4.63911 |
| IL7R     | NM_002185.2    | 0.01  | -0.15085 | 7.403287 | -0.29546 | 0.768975 | 0.994165 | -4.63913 |
| DDX58    | NM_014314.3    | 0.031 | -0.14128 | 5.685544 | -0.29337 | 0.770561 | 0.994165 | -4.63918 |
| CD28     | NM_001243078.1 | 0.178 | -0.18342 | 3.178077 | -0.29093 | 0.772412 | 0.994165 | -4.63925 |
| SERPINB2 | NM_002575.1    | 0.075 | 0.211213 | 5.698605 | 0.285585 | 0.776479 | 0.994165 | -4.63939 |
| PSMB8    | NM_004159.4    | 0     | 0.057971 | 8.725179 | 0.280499 | 0.780353 | 0.994165 | -4.63953 |
| PDGFC    | NM_016205.2    | 0.147 | -0.15157 | 3.22263  | -0.28022 | 0.780566 | 0.994165 | -4.63954 |
| RUNX3    | NM_004350.1    | 0     | -0.07754 | 8.801292 | -0.27499 | 0.784554 | 0.994165 | -4.63967 |
| MARCO    | NM_006770.3    | 0.031 | 0.163928 | 5.389415 | 0.269786 | 0.788532 | 0.994165 | -4.6398  |
| TAL1     | NM_003189.2    | 0.058 | -0.16669 | 4.597146 | -0.26973 | 0.788573 | 0.994165 | -4.63981 |
| TNFRSF1B | NM_001066.2    | 0     | -0.07258 | 9.713878 | -0.26895 | 0.789169 | 0.994165 | -4.63983 |

|        |                |       |          |          |          |          |          |          |
|--------|----------------|-------|----------|----------|----------|----------|----------|----------|
| MYD88  | NM_002468.3    | 0     | 0.064749 | 8.569967 | 0.266708 | 0.790887 | 0.994165 | -4.63988 |
| C1QBP  | NM_001212.3    | 0     | -0.06928 | 7.333467 | -0.26583 | 0.791559 | 0.994165 | -4.6399  |
| MME    | NM_000902.2    | 0.216 | -0.24678 | 5.016458 | -0.26266 | 0.793989 | 0.994165 | -4.63998 |
| SOCS1  | NM_003745.1    | 0.024 | 0.112958 | 5.50065  | 0.258392 | 0.797258 | 0.994165 | -4.64009 |
| CR1    | NM_000651.4    | 0     | 0.102214 | 8.329865 | 0.257305 | 0.798091 | 0.994165 | -4.64011 |
| SMAD2  | NM_005901.5    | 0     | 0.055921 | 6.606409 | 0.256134 | 0.79899  | 0.994165 | -4.64014 |
| CD81   | NM_004356.3    | 0     | 0.061223 | 8.858433 | 0.254246 | 0.800439 | 0.994165 | -4.64018 |
| TYK2   | NM_003331.3    | 0     | 0.048579 | 6.846544 | 0.241974 | 0.809876 | 0.994165 | -4.64047 |
| IFIH1  | NM_022168.2    | 0.003 | 0.078925 | 6.32183  | 0.241564 | 0.810192 | 0.994165 | -4.64048 |
| GZMM   | NM_005317.2    | 0.01  | 0.087518 | 5.838119 | 0.240757 | 0.810814 | 0.994165 | -4.6405  |
| PDGFRB | NM_002609.3    | 0.349 | 0.12248  | 2.205225 | 0.239756 | 0.811585 | 0.994165 | -4.64052 |
| CASP3  | NM_032991.2    | 0.007 | 0.069312 | 5.089648 | 0.236966 | 0.813736 | 0.994165 | -4.64058 |
| DPP4   | NM_001935.3    | 0.366 | -0.14936 | 1.607852 | -0.23468 | 0.815502 | 0.994165 | -4.64063 |
| IRF4   | NM_002460.1    | 0.003 | -0.10634 | 6.239596 | -0.22574 | 0.822405 | 0.994165 | -4.64082 |
| CKLF   | NM_181640.2    | 0     | 0.081193 | 7.453505 | 0.223703 | 0.82398  | 0.994165 | -4.64087 |
| ISG15  | NM_005101.3    | 0     | -0.10876 | 7.06732  | -0.22216 | 0.825172 | 0.994165 | -4.6409  |
| ITGA4  | NM_000885.4    | 0     | -0.04032 | 7.618351 | -0.22153 | 0.825663 | 0.994165 | -4.64091 |
| C3AR1  | NM_004054.2    | 0.147 | 0.154091 | 4.120067 | 0.219546 | 0.827197 | 0.994165 | -4.64095 |
| EWSR1  | NM_013986.3    | 0     | 0.031071 | 8.259702 | 0.217981 | 0.828409 | 0.994165 | -4.64098 |
| TXK    | NM_003328.1    | 0.202 | 0.113441 | 3.152687 | 0.217104 | 0.829088 | 0.994165 | -4.641   |
| MEF2C  | NM_002397.3    | 0.01  | 0.104641 | 6.144537 | 0.214204 | 0.831335 | 0.994165 | -4.64106 |
| ITGB1  | NM_033666.2    | 0     | 0.045089 | 9.265407 | 0.212294 | 0.832816 | 0.994165 | -4.6411  |
| IL6R   | NM_000565.2    | 0     | -0.0566  | 6.601497 | -0.20632 | 0.837449 | 0.994165 | -4.64122 |
| IL2RB  | NM_000878.2    | 0.014 | 0.104237 | 6.905447 | 0.204181 | 0.839113 | 0.994165 | -4.64126 |
| IL23A  | NM_016584.2    | 0.291 | 0.122669 | 2.108989 | 0.197045 | 0.844661 | 0.994165 | -4.64139 |
| LILRA5 | NM_181879.2    | 0     | 0.069625 | 9.380127 | 0.196983 | 0.844709 | 0.994165 | -4.64139 |
| TFE3   | NM_006521.3    | 0.007 | 0.070751 | 4.812652 | 0.1948   | 0.846408 | 0.994165 | -4.64143 |
| ICAM4  | NM_001039132.1 | 0.068 | 0.110414 | 4.095334 | 0.194104 | 0.84695  | 0.994165 | -4.64145 |
| SLAMF1 | NM_003037.2    | 0.205 | 0.124256 | 2.548404 | 0.19392  | 0.847093 | 0.994165 | -4.64145 |
| CMKLR1 | NM_004072.1    | 0.301 | 0.149533 | 2.694735 | 0.192876 | 0.847905 | 0.994165 | -4.64147 |

|         |             |       |          |          |          |          |          |          |
|---------|-------------|-------|----------|----------|----------|----------|----------|----------|
| CD8A    | NM_001768.5 | 0     | 0.080208 | 7.690719 | 0.189225 | 0.85075  | 0.994165 | -4.64153 |
| CD86    | NM_175862.3 | 0.024 | 0.095287 | 5.490634 | 0.185816 | 0.853407 | 0.994165 | -4.64159 |
| FEZ1    | NM_005103.4 | 0.414 | -0.10399 | 1.798337 | -0.18142 | 0.856837 | 0.994165 | -4.64167 |
| FCER1A  | NM_002001.2 | 0.12  | 0.136665 | 4.747797 | 0.179177 | 0.858586 | 0.994165 | -4.64171 |
| F13A1   | NM_000129.3 | 0     | 0.079027 | 9.711828 | 0.175158 | 0.861725 | 0.994165 | -4.64177 |
| PPBP    | NM_002704.2 | 0     | -0.08526 | 11.92664 | -0.17379 | 0.86279  | 0.994165 | -4.64179 |
| IRF2    | NM_002199.3 | 0     | -0.05405 | 6.138062 | -0.17249 | 0.863807 | 0.994165 | -4.64182 |
| ITGA5   | NM_002205.2 | 0     | 0.038109 | 7.247719 | 0.171759 | 0.864381 | 0.994165 | -4.64183 |
| CLEC4A  | NM_194448.2 | 0     | -0.04086 | 8.014145 | -0.1714  | 0.86466  | 0.994165 | -4.64183 |
| THBD    | NM_000361.2 | 0.003 | 0.079565 | 8.602248 | 0.168465 | 0.866956 | 0.994165 | -4.64188 |
| HLA-G   | NM_002127.4 | 0     | 0.043825 | 7.116824 | 0.165659 | 0.869152 | 0.994165 | -4.64192 |
| ARG1    | NM_000045.2 | 0.408 | -0.11843 | 2.621635 | -0.16285 | 0.87135  | 0.994165 | -4.64197 |
| CD200   | NM_005944.5 | 0.226 | -0.08549 | 2.747506 | -0.16075 | 0.872991 | 0.994165 | -4.642   |
| TNFRSF8 | NM_152942.2 | 0.373 | -0.09138 | 1.852716 | -0.15867 | 0.874623 | 0.994165 | -4.64203 |
| XCL2    | NM_003175.3 | 0.038 | 0.088852 | 5.603926 | 0.158303 | 0.874912 | 0.994165 | -4.64204 |
| APP     | NM_000484.3 | 0     | 0.033688 | 7.831006 | 0.157674 | 0.875404 | 0.994165 | -4.64204 |
| CD5     | NM_014207.2 | 0.007 | 0.068243 | 7.011149 | 0.156417 | 0.87639  | 0.994165 | -4.64206 |
| S100A8  | NM_002964.3 | 0     | 0.061241 | 13.06959 | 0.155946 | 0.876758 | 0.994165 | -4.64207 |
| ANP32B  | NM_006401.2 | 0     | -0.04245 | 8.323172 | -0.15467 | 0.877761 | 0.994165 | -4.64209 |
| FCGR3A  | NM_000569.6 | 0     | 0.062081 | 8.95422  | 0.151797 | 0.880011 | 0.994165 | -4.64213 |
| RELB    | NM_006509.2 | 0     | -0.04777 | 6.880603 | -0.15047 | 0.881056 | 0.994165 | -4.64215 |
| NFATC3  | NM_004555.2 | 0     | -0.03314 | 6.823623 | -0.14965 | 0.881693 | 0.994165 | -4.64216 |
| MEFV    | NM_000243.2 | 0.003 | 0.062977 | 7.438844 | 0.149147 | 0.88209  | 0.994165 | -4.64217 |
| MAP4K2  | NM_004579.2 | 0     | -0.02642 | 6.850069 | -0.14214 | 0.887587 | 0.994165 | -4.64226 |
| SBNO2   | NM_014963.2 | 0.003 | 0.047515 | 6.650402 | 0.1405   | 0.888879 | 0.994165 | -4.64228 |
| STAT2   | NM_005419.2 | 0     | 0.050234 | 7.744843 | 0.136264 | 0.892207 | 0.994165 | -4.64234 |
| TICAM1  | NM_014261.1 | 0.003 | -0.03577 | 6.484478 | -0.13526 | 0.892998 | 0.994165 | -4.64235 |
| FPR2    | NM_001462.3 | 0.041 | -0.07024 | 5.454238 | -0.13194 | 0.895607 | 0.994165 | -4.64239 |
| FLT3LG  | NM_001459.3 | 0     | -0.03383 | 7.123105 | -0.12936 | 0.897636 | 0.994165 | -4.64243 |
| MAVS    | NM_020746.3 | 0.031 | 0.048897 | 4.531542 | 0.129247 | 0.897726 | 0.994165 | -4.64243 |

|          |                |       |          |          |          |          |          |          |
|----------|----------------|-------|----------|----------|----------|----------|----------|----------|
| IFNG     | NM_000619.2    | 0.007 | -0.05665 | 6.698489 | -0.12757 | 0.899049 | 0.994165 | -4.64245 |
| IRAK1    | NM_001569.3    | 0     | -0.02466 | 7.154834 | -0.12701 | 0.899483 | 0.994165 | -4.64245 |
| CYLD     | NM_015247.1    | 0     | -0.02606 | 8.487604 | -0.12384 | 0.901985 | 0.994165 | -4.64249 |
| BAX      | NM_138761.3    | 0     | 0.019117 | 8.065971 | 0.120445 | 0.904656 | 0.994165 | -4.64253 |
| JAK3     | NM_000215.2    | 0     | 0.03046  | 7.815328 | 0.118074 | 0.906523 | 0.994165 | -4.64256 |
| PIK3CD   | NM_005026.3    | 0     | 0.044758 | 7.383324 | 0.117569 | 0.906922 | 0.994165 | -4.64256 |
| KIR3DL2  | NM_006737.2    | 0.253 | 0.059186 | 2.403673 | 0.111139 | 0.91199  | 0.994281 | -4.64263 |
| ITGAX    | NM_000887.3    | 0     | 0.031248 | 9.221799 | 0.110137 | 0.91278  | 0.994281 | -4.64264 |
| TNFRSF1A | NM_001065.2    | 0     | 0.026647 | 7.511156 | 0.106252 | 0.915845 | 0.994281 | -4.64268 |
| SLAMF6   | NM_001184714.1 | 0.267 | 0.069651 | 2.349106 | 0.105125 | 0.916734 | 0.994281 | -4.64269 |
| VEGFA    | NM_001025366.1 | 0     | -0.03126 | 8.070343 | -0.10457 | 0.917173 | 0.994281 | -4.6427  |
| TCF7     | NM_003202.2    | 0.021 | 0.048109 | 6.956808 | 0.098442 | 0.92201  | 0.996051 | -4.64275 |
| CD99     | NM_002414.3    | 0     | 0.027381 | 9.897383 | 0.096948 | 0.923189 | 0.996051 | -4.64277 |
| HLA-DQB1 | NM_002123.3    | 0.315 | -0.08819 | 5.047712 | -0.09163 | 0.927389 | 0.996051 | -4.64282 |
| TANK     | NM_004180.2    | 0     | -0.01873 | 8.706135 | -0.08385 | 0.933541 | 0.996051 | -4.64288 |
| ENG      | NM_001114753.1 | 0.051 | 0.042011 | 4.250448 | 0.078181 | 0.938024 | 0.996051 | -4.64292 |
| TLR8     | NM_016610.2    | 0.014 | 0.026934 | 5.419839 | 0.077204 | 0.938796 | 0.996051 | -4.64293 |
| LAMP1    | NM_005561.3    | 0     | -0.0116  | 8.732198 | -0.07134 | 0.943434 | 0.996051 | -4.64297 |
| CXCL5    | NM_002994.3    | 0.027 | 0.038895 | 5.848684 | 0.069412 | 0.944963 | 0.996051 | -4.64298 |
| IFI35    | NM_005533.3    | 0.027 | -0.04063 | 5.504062 | -0.06924 | 0.945102 | 0.996051 | -4.64298 |
| CXCL3    | NM_002090.2    | 0.267 | 0.067806 | 3.780252 | 0.066652 | 0.947148 | 0.996051 | -4.643   |
| IL17RA   | NM_014339.6    | 0.003 | -0.01907 | 7.20004  | -0.06309 | 0.94997  | 0.996051 | -4.64302 |
| NT5E     | NM_002526.2    | 0.137 | -0.03996 | 2.662419 | -0.06302 | 0.950024 | 0.996051 | -4.64302 |
| IKBKB    | NM_001556.1    | 0.024 | -0.02095 | 4.93791  | -0.06256 | 0.950385 | 0.996051 | -4.64303 |
| ITGB3    | NM_000212.2    | 0.003 | -0.03475 | 7.078078 | -0.06181 | 0.950982 | 0.996051 | -4.64303 |
| CXCL16   | NM_001100812.1 | 0.003 | -0.02418 | 7.176502 | -0.05954 | 0.952777 | 0.996051 | -4.64304 |
| IRF7     | NM_001572.3    | 0     | -0.01686 | 7.693078 | -0.05335 | 0.957687 | 0.996051 | -4.64308 |
| NFATC1   | NM_172389.1    | 0.007 | -0.01467 | 5.167577 | -0.04863 | 0.961429 | 0.996051 | -4.6431  |
| JAK1     | NM_002227.1    | 0     | 0.007636 | 9.217217 | 0.047975 | 0.961944 | 0.996051 | -4.6431  |
| TNFSF10  | NM_003810.2    | 0     | -0.01957 | 7.566405 | -0.0479  | 0.962002 | 0.996051 | -4.6431  |

|         |                |       |           |          |          |          |          |          |
|---------|----------------|-------|-----------|----------|----------|----------|----------|----------|
| STAT6   | NM_003153.3    | 0     | -0.0128   | 9.391131 | -0.04758 | 0.96226  | 0.996051 | -4.6431  |
| IL13RA1 | NM_001560.2    | 0     | -0.01696  | 7.264141 | -0.04525 | 0.964104 | 0.996051 | -4.64311 |
| IGF2R   | NM_000876.1    | 0.003 | -0.01115  | 7.211368 | -0.0426  | 0.966205 | 0.996051 | -4.64312 |
| IRAK4   | NM_016123.1    | 0.007 | -0.01304  | 5.505175 | -0.04243 | 0.966337 | 0.996051 | -4.64312 |
| SELPLG  | NM_001206609.1 | 0     | -0.01511  | 7.208536 | -0.04085 | 0.967593 | 0.996051 | -4.64313 |
| SH2D1A  | NM_001114937.2 | 0.024 | 0.014992  | 5.607209 | 0.029994 | 0.976202 | 0.998197 | -4.64317 |
| TP53    | NM_000546.2    | 0.014 | 0.01142   | 5.297269 | 0.029161 | 0.976862 | 0.998197 | -4.64317 |
| CCL5    | NM_002985.2    | 0     | -0.0112   | 10.64813 | -0.02847 | 0.977409 | 0.998197 | -4.64317 |
| IL18RAP | NM_003853.2    | 0.065 | 0.018658  | 5.650186 | 0.027946 | 0.977826 | 0.998197 | -4.64317 |
| CTSG    | NM_001911.2    | 0.462 | 0.017642  | 1.970743 | 0.023724 | 0.981176 | 0.999535 | -4.64318 |
| TLR6    | NM_006068.2    | 0.024 | 0.006344  | 5.028522 | 0.018612 | 0.985232 | 0.999899 | -4.64319 |
| PLAUR   | NM_001005376.1 | 0     | -0.006    | 9.602724 | -0.01795 | 0.985757 | 0.999899 | -4.64319 |
| CHUK    | NM_001278.3    | 0     | -0.0036   | 6.830635 | -0.01278 | 0.989862 | 0.999899 | -4.6432  |
| ETS1    | NM_005238.3    | 0     | -0.0031   | 9.049235 | -0.0098  | 0.992226 | 0.999899 | -4.6432  |
| IKBKG   | NM_003639.2    | 0.003 | 0.001145  | 6.422169 | 0.005787 | 0.995408 | 0.999899 | -4.64321 |
| ITK     | NM_005546.3    | 0.007 | -0.00237  | 7.125809 | -0.00553 | 0.99561  | 0.999899 | -4.64321 |
| CAMP    | NM_004345.3    | 0.253 | -0.00146  | 3.309635 | -0.00185 | 0.998534 | 0.999899 | -4.64321 |
| CSF1    | NM_000757.4    | 0.236 | -0.00059  | 3.534624 | -0.00088 | 0.999304 | 0.999899 | -4.64321 |
| PIK3CG  | NM_002649.2    | 0.003 | -2.48E-05 | 7.102338 | -0.00013 | 0.999899 | 0.999899 | -4.64321 |

D-Rd, daratumumab, lenalidomide, and dexamethasone; C, Cycle; D, Day; Rd, lenalidomide and dexamethasone.

**Table S4. Corresponding median values for Figures 2A, 2D, and 2E.**

(A) Median ratio of CD56<sup>dim</sup> to CD56<sup>bright</sup> cells relative to the total number of NK cells at baseline and upon treatment. (B) Median percentage of CD137<sup>+</sup>CD56<sup>dim</sup> and CD56<sup>bright</sup> NK cells relative to total CD56<sup>dim</sup> and CD56<sup>bright</sup> NK cells, respectively. (C) Median percentages of subtypes of CD27 and CD69 NK cells relative to total NK cells.

| <b>A.</b> |                   |                   |                      |                      |                                     |
|-----------|-------------------|-------------------|----------------------|----------------------|-------------------------------------|
| Treatment | log2ratio at C1D1 | log2ratio at C3D1 | Median ratio at C1D1 | Median ratio at C3D1 | Paired Wilcoxon test <i>P</i> value |
| D-Rd      | 4.41              | 2.31              | 21.2                 | 4.97                 | $5.72 \times 10^{-6}$               |
| Rd        | 4.3               | 4.21              | 19.8                 | 18.5                 | 0.0684                              |
| <b>B.</b> |                   |                   |                      |                      |                                     |
| Treatment | Channel           | Population        | Median % at C1D1     | Median % at C3D1     | Paired wilcoxon test <i>P</i> value |
| D-Rd      | CD137             | CD56dim NK        | 23.4                 | 31.8                 | $7.22 \times 10^{-6}$               |
| D-Rd      | CD137             | CD56Br NK         | 19.8                 | 22.8                 |                                     |
| Rd        | CD137             | CD56dim NK        | 20.7                 | 20.4                 | 0.619                               |
| Rd        | CD137             | CD56Br NK         | 16.1                 | 17.1                 |                                     |
| <b>C.</b> |                   |                   |                      |                      |                                     |
| Treatment | CD27              | CD69              | Median % at C1D1     | Median % at C3D1     | Paired wilcoxon test <i>p</i> value |
| DRd       | CD27-neg          | CD69-neg          | 63.7                 | 29.8                 | $2.93 \times 10^{-5}$               |
| DRd       | CD27-neg          | CD69-pos          | 22.7                 | 21.4                 | 0.882                               |
| DRd       | CD27-pos          | CD69-neg          | 8.4                  | 23.5                 | $4 \times 10^{-6}$                  |
| DRd       | CD27-pos          | CD69-pos          | 4.05                 | 18.2                 | $4 \times 10^{-6}$                  |
| Rd        | CD27-neg          | CD69-neg          | 67.5                 | 66                   | 0.458                               |
| Rd        | CD27-neg          | CD69-pos          | 18.4                 | 18.5                 | 0.734                               |
| Rd        | CD27-pos          | CD69-neg          | 9.7                  | 9.6                  | 0.562                               |
| Rd        | CD27-pos          | CD69-pos          | 3.2                  | 3.6                  | 0.137                               |

NK, natural killer; C, Cycle; D, Day; D-Rd, daratumumab, lenalidomide, and dexamethasone; Rd, lenalidomide and dexamethasone.

**Table S5. Corresponding median values for Figures 3A and 3C.**

Median proportion of total T cells, CD8 T cells, CD4 T cells, T<sub>EM</sub>RA CD38 T cells, and T<sub>EM</sub> CD38 T cells of total cells.

| Treatment                           | Median proportion of cells at C1D1 | Median proportion of cells at C3D1 | Paired Wilcoxon test <i>P</i> value |
|-------------------------------------|------------------------------------|------------------------------------|-------------------------------------|
| <b>Total T cells</b>                |                                    |                                    |                                     |
| D-Rd                                | 0.550                              | 0.630                              | $9.04 \times 10^{-4}$               |
| Rd                                  | 0.534                              | 0.507                              | 0.228                               |
| <b>CD8 T cells</b>                  |                                    |                                    |                                     |
| D-Rd                                | 0.202                              | 0.322                              | $2.86 \times 10^{-7}$               |
| Rd                                  | 0.255                              | 0.218                              | 0.596                               |
| <b>CD4 T cells</b>                  |                                    |                                    |                                     |
| D-Rd                                | 0.273                              | 0.236                              | 0.011                               |
| Rd                                  | 0.227                              | 0.244                              | 0.376                               |
| <b>T<sub>EM</sub>RA CD8 T cells</b> |                                    |                                    |                                     |
| D-Rd                                | 0.0729                             | 0.0905                             | 0.163                               |
| Rd                                  | 0.0723                             | 0.0354                             | $1.61 \times 10^{-5}$               |
| <b>T<sub>EM</sub> CD8 T cells</b>   |                                    |                                    |                                     |
| D-Rd                                | 0.012                              | 0.0347                             | $9.96 \times 10^{-7}$               |
| Rd                                  | 0.0166                             | 0.0258                             | 0.00583                             |

T<sub>EM</sub>, effector memory T cells; T<sub>EM</sub>RA, effector memory CD45RA<sup>+</sup> T cells; C, Cycle; D, Day; D-Rd, daratumumab, lenalidomide, and dexamethasone; Rd, lenalidomide and dexamethasone.

**Table S6. Corresponding median values for Figures 4A and 4B.**

Median CD38 signal intensity of CD38<sup>+</sup> T<sub>reg</sub> cells and MDSCs.

| Treatment                         | Median MSI of cells at C1D1 | Median MSIo of cells at C3D1 | Paired Wilcoxon test <i>P</i> value |
|-----------------------------------|-----------------------------|------------------------------|-------------------------------------|
| <b>CD38 T<sub>reg</sub> cells</b> |                             |                              |                                     |
| D-Rd                              | 0.623                       | 0.246                        | $5.32 \times 10^{-6}$               |
| Rd                                | 0.54                        | 0.597                        | 0.944                               |
| <b>MDSCs</b>                      |                             |                              |                                     |
| D-Rd                              | 2.300603                    | 1.654633                     | $1.28 \times 10^{-7}$               |
| Rd                                | 2.196249                    | 2.113935                     | 0.465                               |

MDSC, myeloid-derived suppressor cell; MSI, mean signal intensity; C, Cycle; D, Day; D-Rd, daratumumab, lenalidomide, and dexamethasone; Rd, lenalidomide and dexamethasone.



**Table S7. Corresponding median values for Figure 5A.**  
 Median T-cell repertoire clonality.

| Treatment                          | Median at C1D1 | Median at C3D1 | Paired Wilcoxon test <i>P</i> value |
|------------------------------------|----------------|----------------|-------------------------------------|
| <b>T-cell repertoire clonality</b> |                |                |                                     |
| D-Rd                               | 0.174          | 0.263          | $3.000265 \times 10^{-12}$          |
| Rd                                 | 0.170          | 0.172          | 0.665267                            |

C, Cycle; D, Day; D-Rd, daratumumab, lenalidomide, and dexamethasone; Rd, lenalidomide and dexamethasone.

## Supplemental Figures

### Figure S1. Quality control assessment of CyTOF<sup>®</sup> by (A) Earth mover's distance and (B) MEM analysis.

(A) Quality control of this sample set, by earth mover's distance analysis and inspection of the subsequent hierarchical clustering (UPGMA) tree structure, revealed the expected clustering of the control samples (shown in blue). (B) Per-channel MEM scores further confirmed the absence of batch effects. CyTOF, cytometry by time-of-flight; lympho, lymphocytes; MEM, marker enrichment modeling; mono, monocytes; SPADE, spanning-tree progression analysis of density-normalized events; UPGMA, unweighted pair group method with arithmetic mean.

A.

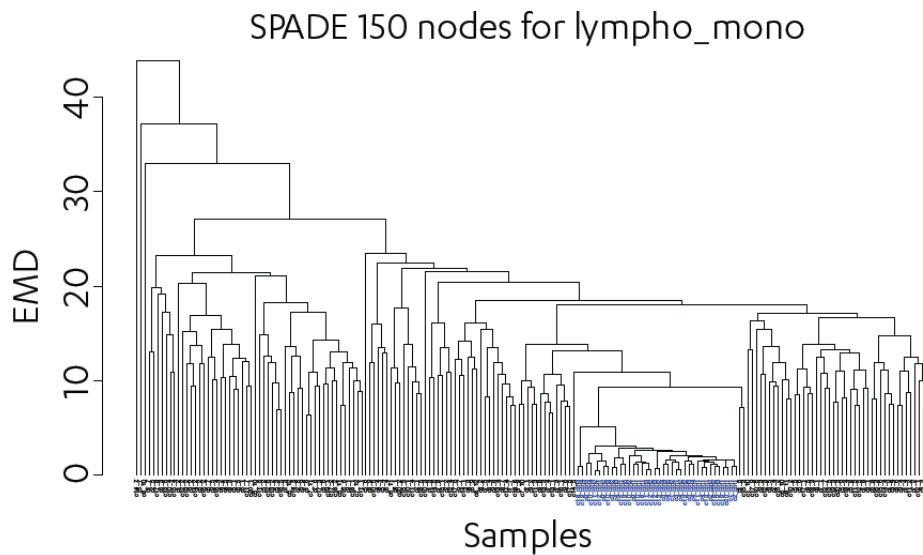

B.

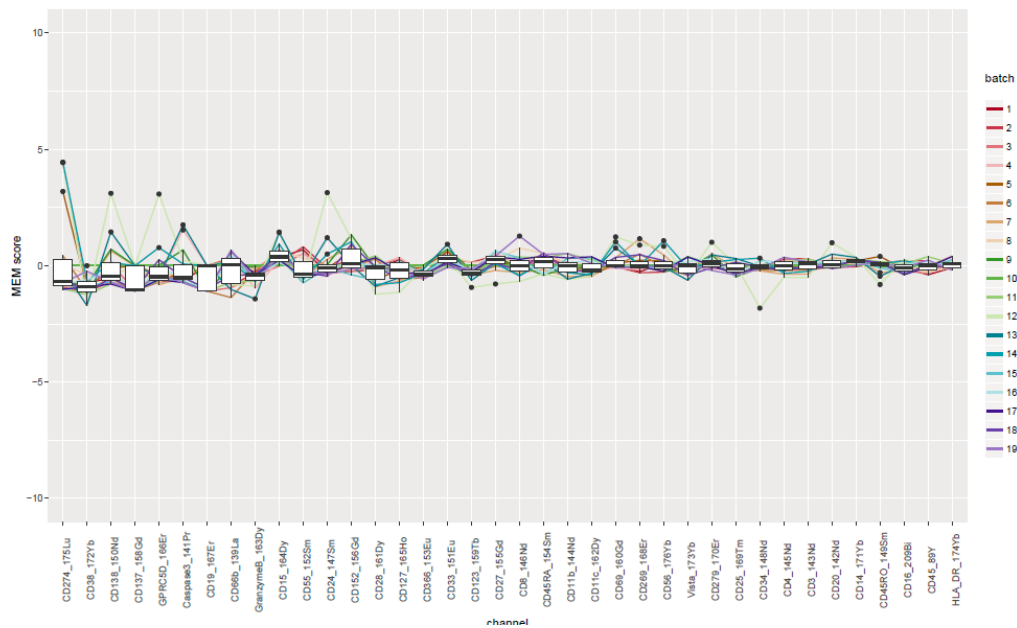

### Figure S2. Quality control assessment of NanoString results.

(A) Sample  $\log_2(\text{Count})$  median, interquartile range, and whiskers for each class of probe, grouped by analysis plate. Samples with median  $\log_2(\text{Count})$  values  $\leq 3$  were removed from the analysis due to poor quantification. (B) Across that study, with 1 exception, positive control probes exhibited linear behavior and were confidently detected above the noise floor. IQR, interquartile range.

A.

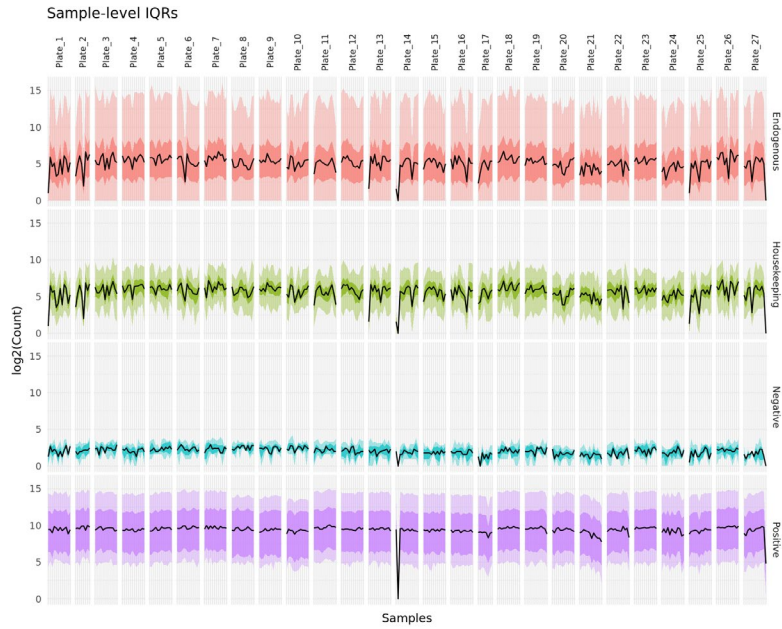

B.

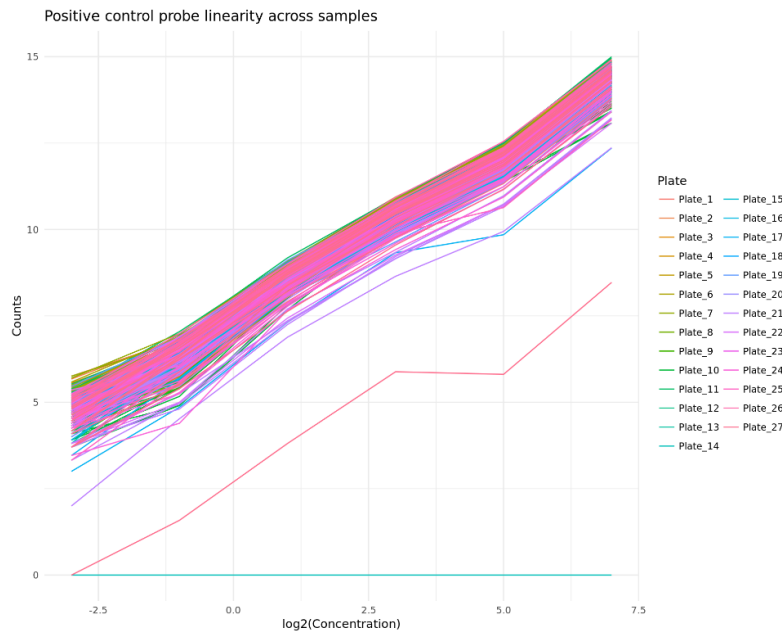

**Figure S3. Differential expression testing results on the NanoString platform of baseline versus on-treatment samples of D-Rd- and Rd-treated patients, for the standard NanoString data with significantly regulated genes by both treatments highlighted (with adjusted  $P < 0.05$ ), and for the NanoString data corrected for the CyTOF-derived cellular abundances with the NK-cell and T-cell genes highlighted.**

Baseline versus on-treatment samples of (A and B, left) D-Rd- and (A and B, right) Rd-treated patients, for (A) the standard NanoString data with significantly regulated genes by both treatments highlighted (with adjusted  $P < 0.05$ ; red dots), and (B) for the NanoString data corrected for the CyTOF-derived cellular abundances with the NK-cell and T-cell genes highlighted (blue dots). (C) Venn diagram with number of shared and unique differentially expressed genes, based on standard NanoString data analysis. C, Cycle; CyTOF, cytometry by time-of-flight; D, day.

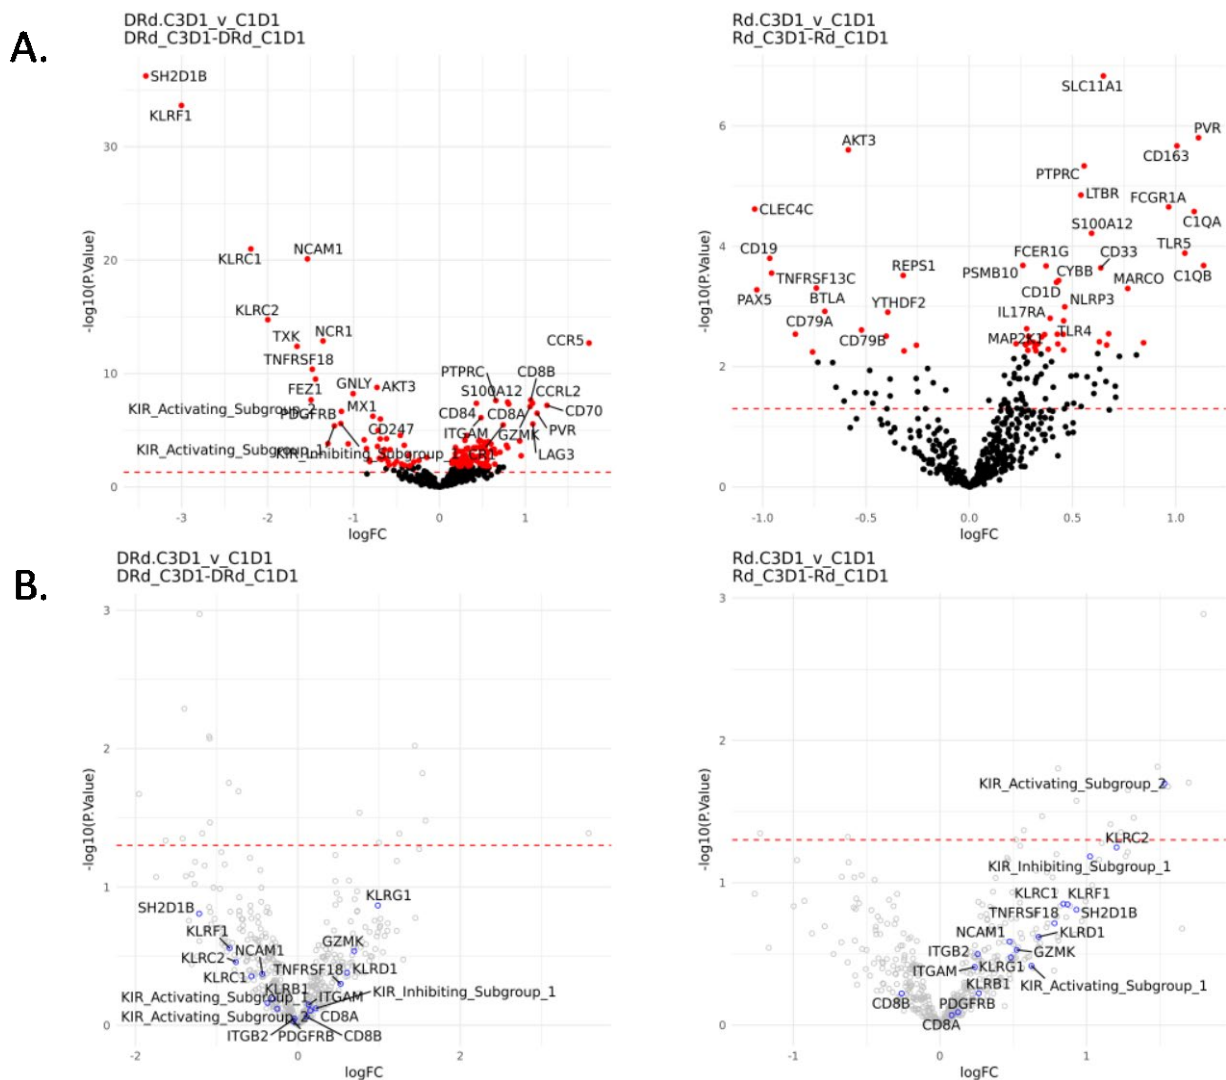

**C.**

DE genes: C3D1 vs C1D1

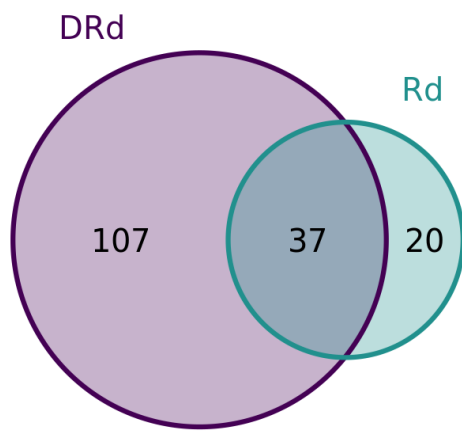

**Figure S4. Phenotype of persistent NK cells were upon D-Rd treatment.**

(A) Three patients treated with D-Rd had levels of NK cells that stayed stable or increased (NK increased) and were phenotypically distinct from the rest of the patient population (NK decreased). (B-E) Analysis on patient population including 3 patients with NK cell that stayed stable or increased: (B) On-treatment to baseline ratio of positive cell fraction levels in D-Rd and Rd in function of the signal intensity centiles for a subset of markers across CD56<sup>dim</sup> and CD56<sup>bright</sup> NK cells. (C) Radviz projection with contour plots representing marker expression levels of CD56<sup>bright</sup> and CD56<sup>dim</sup> cells at baseline and upon D-Rd and Rd treatment. (D) Percentages of CD137<sup>+</sup> CD56<sup>dim</sup>, and CD56<sup>bright</sup> NK cells relative to total CD56<sup>dim</sup> and CD56<sup>bright</sup> NK cells, respectively. (E) Percentages of subtypes of CD27 and CD69 NK cells relative to total NK cells. C, Cycle; D, Day; D-Rd, daratumumab, lenalidomide, dexamethasone; NK, natural killer; Rd, lenalidomide, dexamethasone.

**A.**

**CD56<sup>dim</sup>**

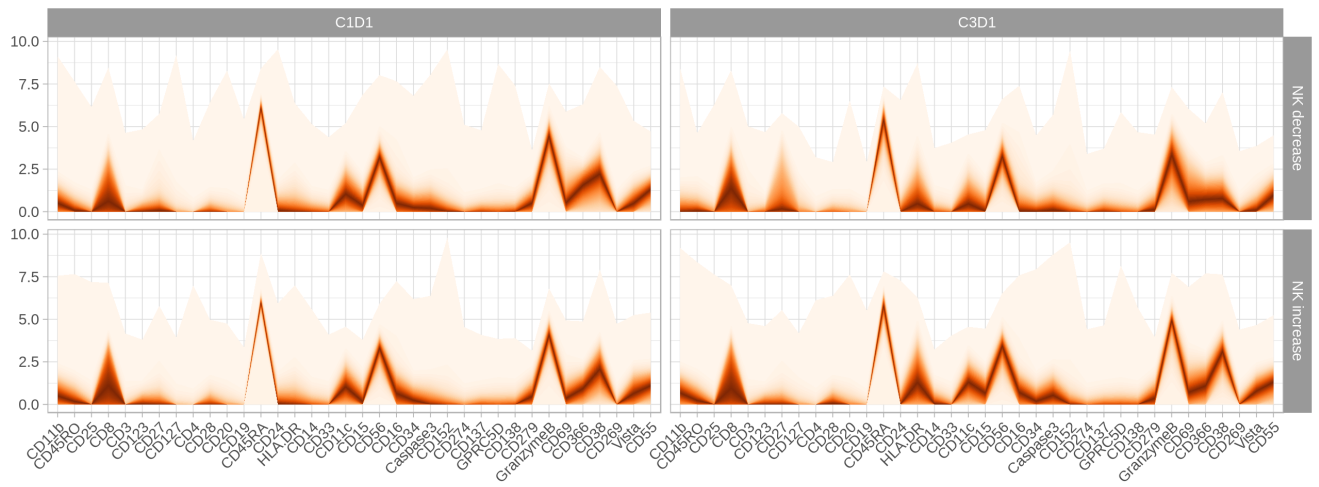

**B.**

**CD56<sup>bright</sup>**

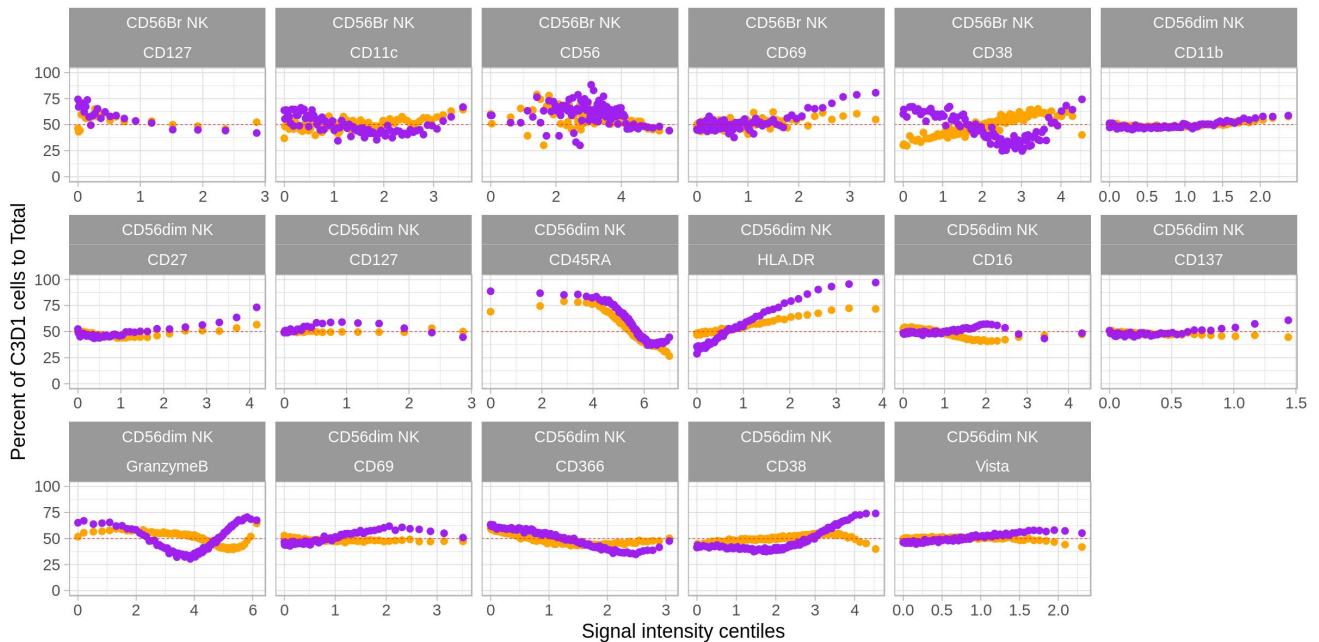

C.

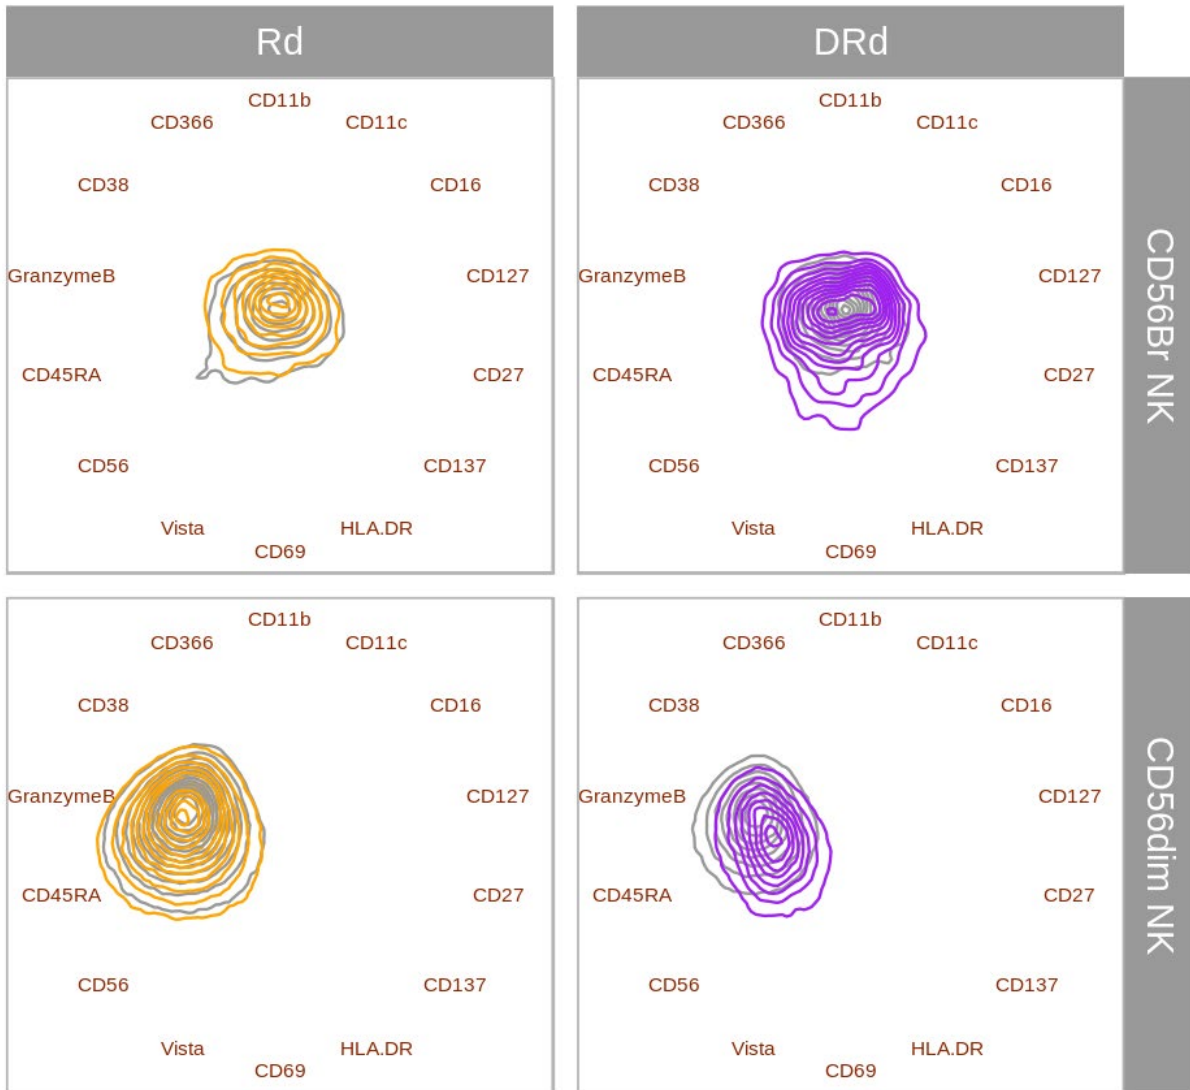

D.

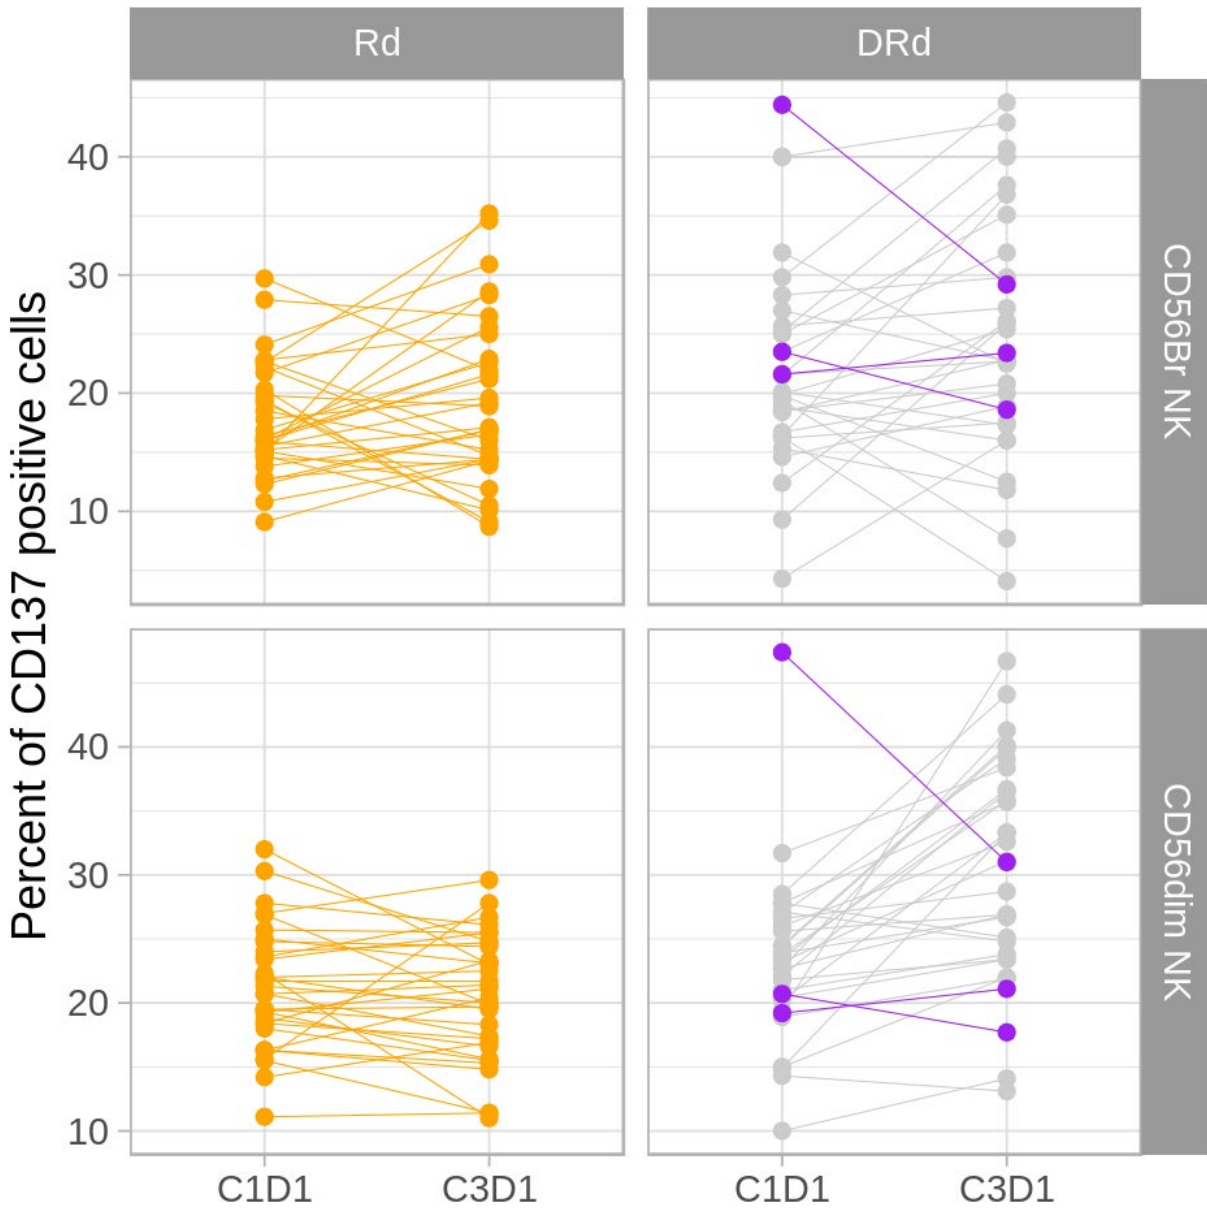



**E.**

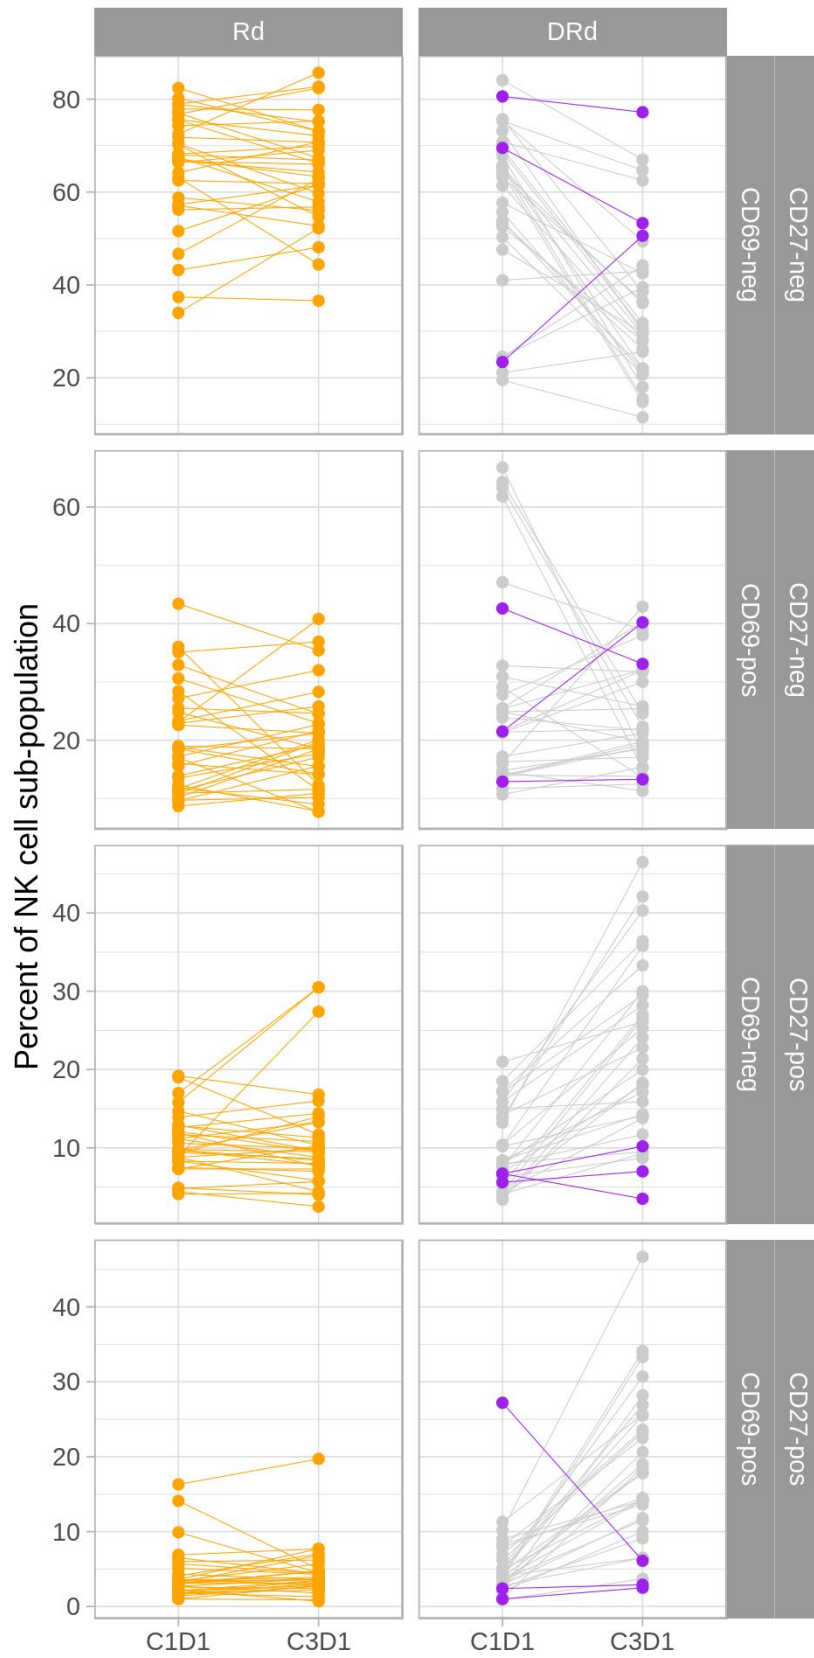

**Figure S5. On-treatment to baseline ratio of CD38 expression levels on PBMCs, lymphocytes, T<sub>reg</sub>, and CD8 T-cell fractions in D-Rd and Rd treatment groups.** (A) PBMCs, (B) lymphocytes, (C) T<sub>reg</sub>, (D) CD8 T-cell, and (E) basophil fractions in D-Rd and Rd treatment groups. C, Cycle; D, Day; D-Rd, daratumumab, lenalidomide, dexamethasone; MFI, median fluorescence intensity; NK, natural killer; PBMC, peripheral-blood mononuclear cell; Rd, lenalidomide, dexamethasone; T<sub>reg</sub>, regulatory T cell.

**A.**

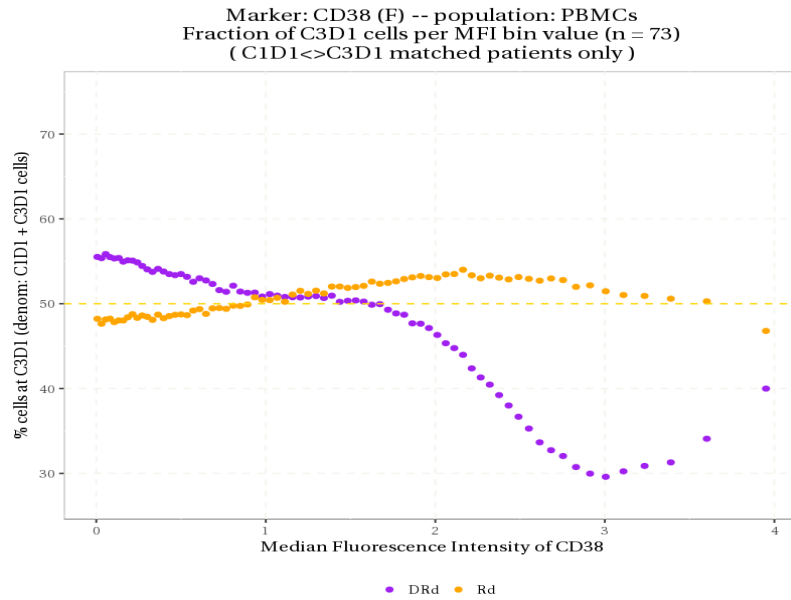

**B.**

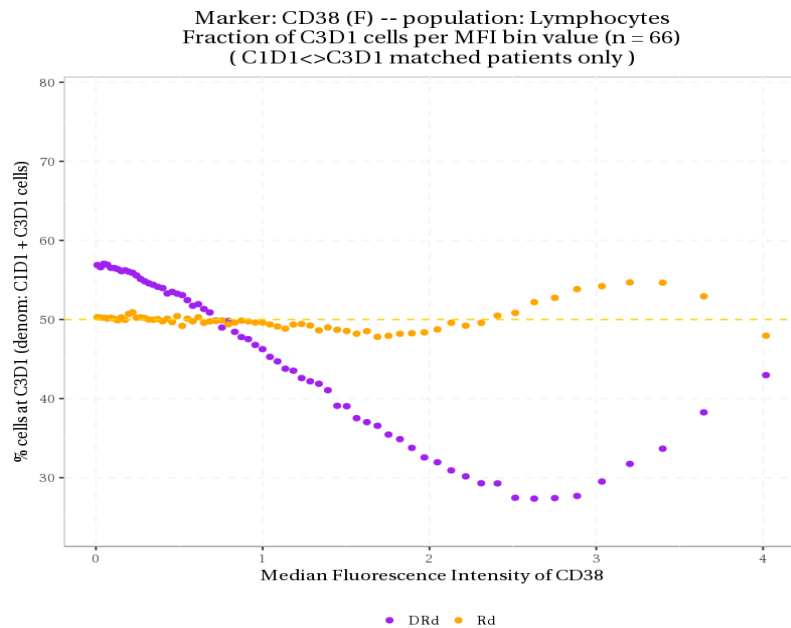

C.

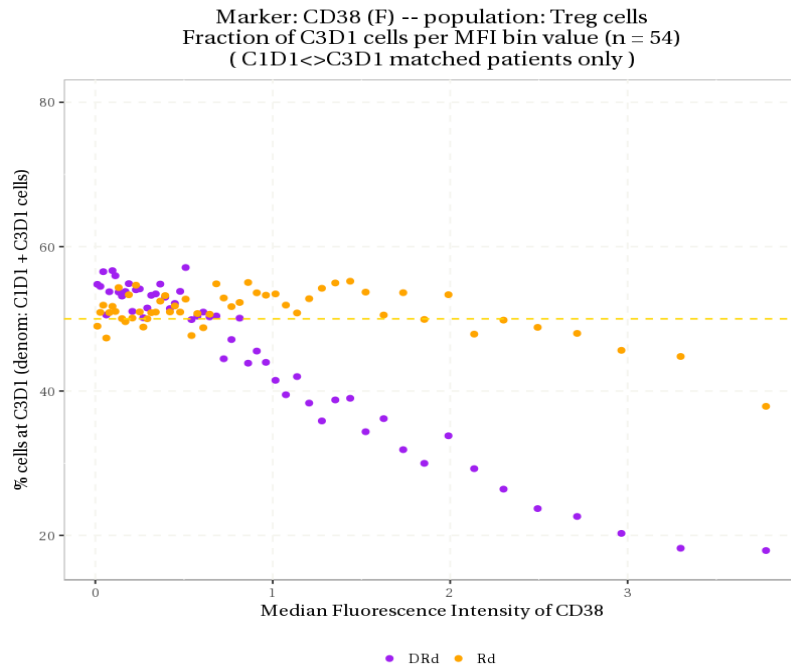

D.

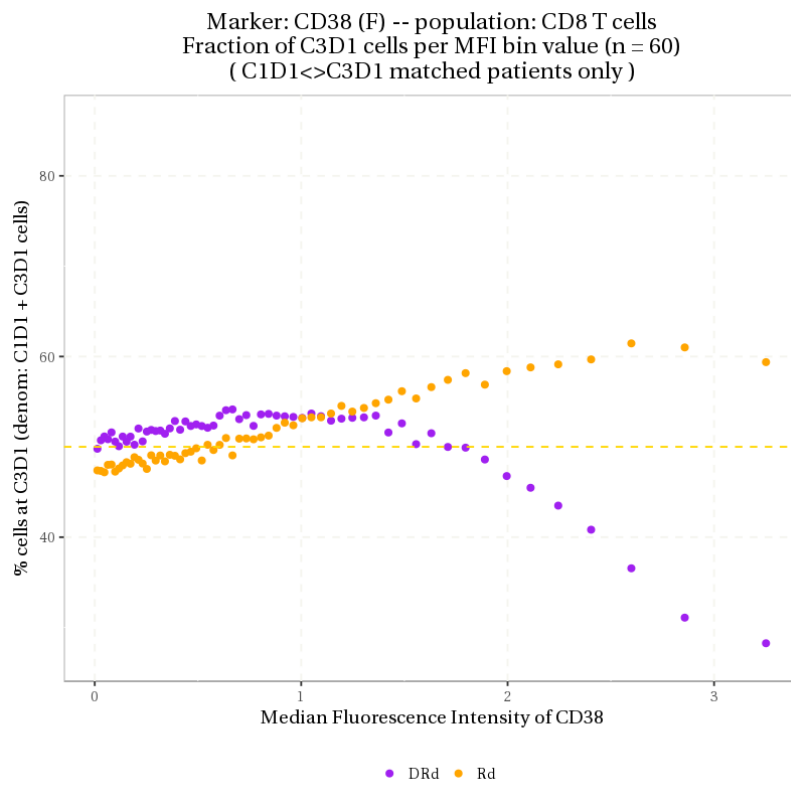

E.

Marker: CD38 (F) -- population: Basophils  
Fraction of C3D1 cells per MFI bin value (n = 90)  
(C1D1<>C3D1 matched patients only)

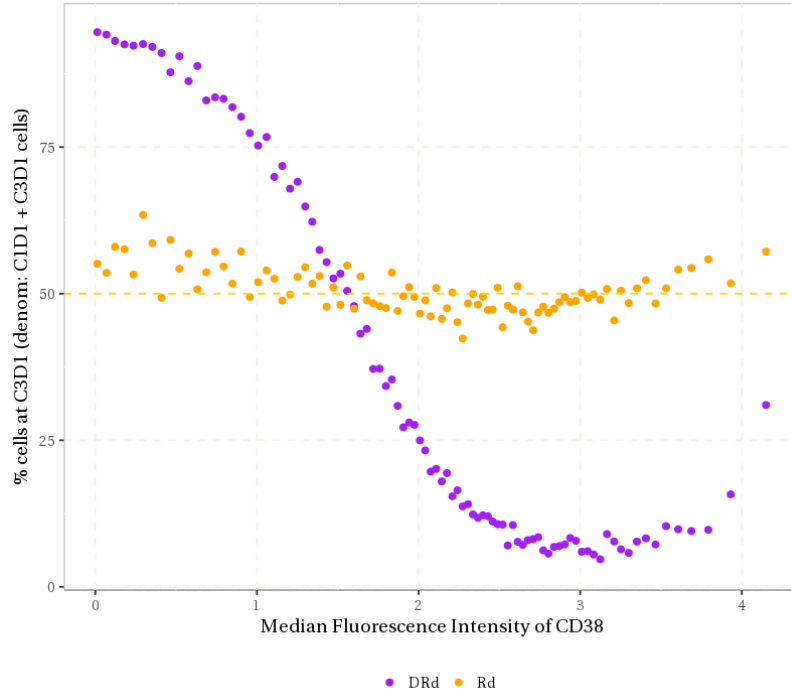

**Figure S6. T-cell clonality, T-cell clonality per patient, and T-cell richness with D-Rd compared with Rd.**

(A) T-cell clonality (B) T-cell clonality per patient, and (C) T-cell richness. D-Rd, daratumumab, lenalidomide, dexamethasone; Rd, lenalidomide, dexamethasone.

**A.**

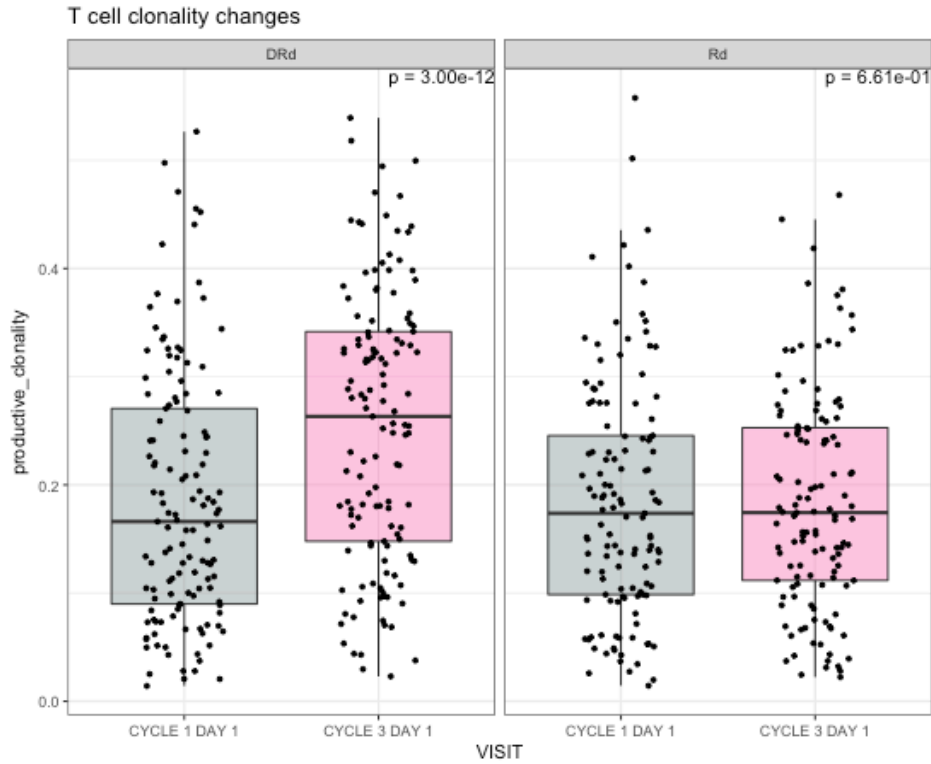

**B.**

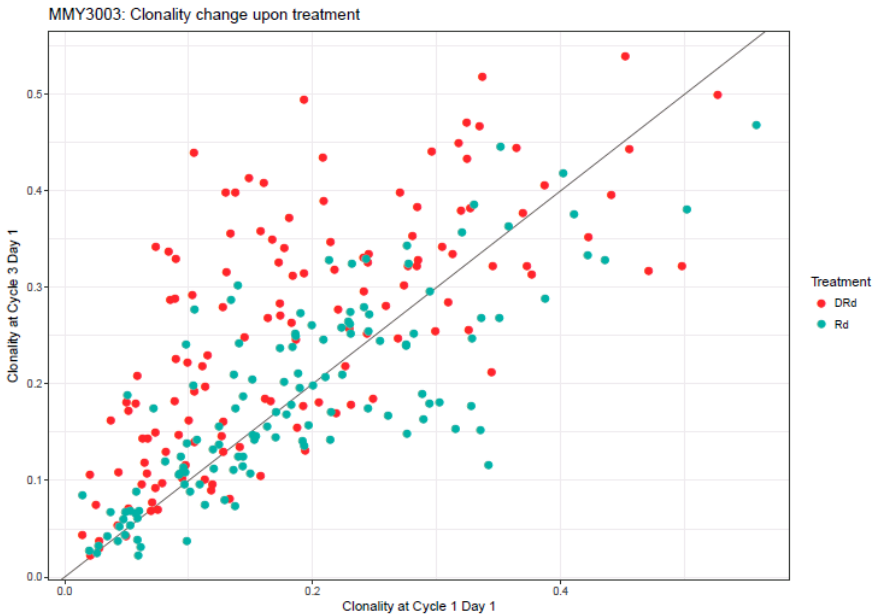

C.

T cell richness changes

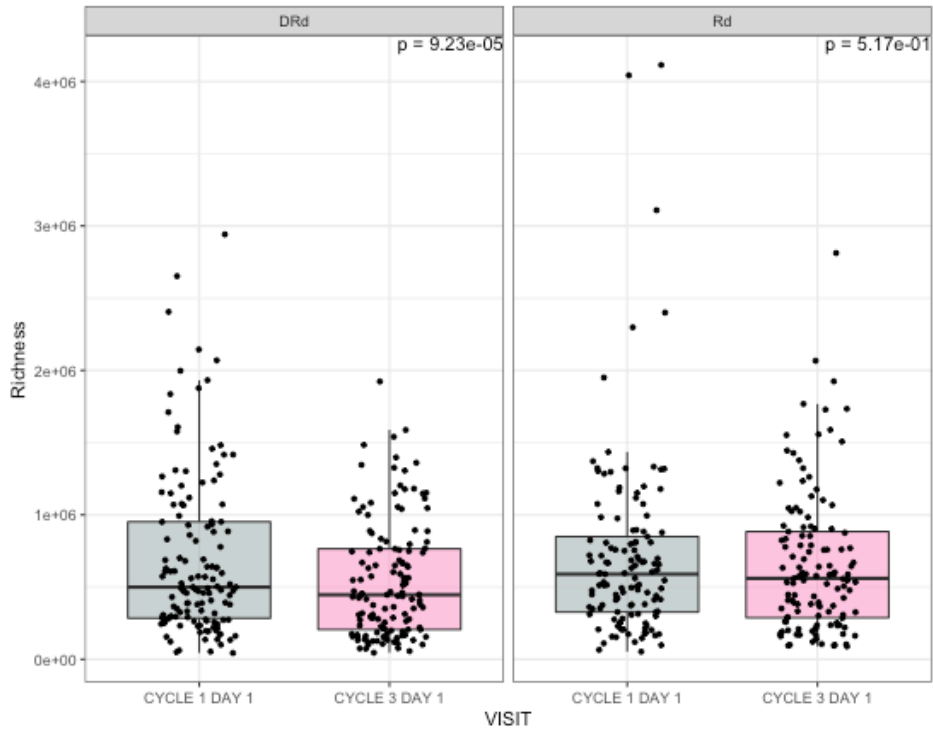

Supplement: 41375_2020_855_MOESM1_ESM.pdf [file 41375_2020_855_MOESM1_ESM.pdf]
